# 1 Population-level asymmetry of the cerebral cortex: reproducibility, 2 lifespan changes, heritability, and individual differences

## 3 4 **Authors and affiliations**

5 James M. Roe<sup>1\*</sup>, Didac Vidal-Piñeiro<sup>1</sup>, Inge K. Amlie<sup>1</sup>, Mengyu Pan<sup>1</sup>, Markus H. Sneve<sup>1</sup>, Michel  
6 Thiebaut de Schotten<sup>2,3</sup>, Patrick Friedrich<sup>4</sup>, Zhiqiang Sha<sup>5</sup>, Clyde Francks<sup>5,6</sup>, Yunpeng Wang<sup>1</sup>, Kristine  
7 B. Walhovd<sup>1,7</sup>, Anders M. Fjell<sup>1,7</sup> & René Westerhausen<sup>8</sup>

8  
9 <sup>1</sup>Center for Lifespan Changes in Brain and Cognition (LCBC), Department of Psychology, University of Oslo, Norway.

10 <sup>2</sup>Groupe d'Imagerie Neurofonctionnelle, Institut des Maladies Neurodégénératives-UMR 5293, CNRS, CEA, University of  
11 Bordeaux, Bordeaux, France.

12 <sup>3</sup>Brain Connectivity and Behaviour Laboratory, Sorbonne Universities, Paris, France.

13 <sup>4</sup>Institute of Neuroscience and Medicine (INM-7: Brain and Behaviour), Research Centre Jülich, Jülich, Germany.

14 <sup>5</sup>Language and Genetics Department, Max Planck Institute for Psycholinguistics, Nijmegen, The Netherlands.

15 <sup>6</sup>Donders Institute Netherlands for Brain, Cognition and Behaviour, Radboud University, Nijmegen, The Netherlands.

16 <sup>7</sup>Department of Radiology and Nuclear Medicine, Oslo University Hospital, Oslo, Norway.

17 <sup>8</sup>Section for Cognitive and Clinical Neuroscience, Department of Psychology, University of Oslo, Norway.

18  
19  
20 \*Address correspondence to James M. Roe, Department of Psychology, PO Box 1094 Blindern, 0317 Oslo, Norway.

21 Email: [j.m.roe@psykologi.uio.no](mailto:j.m.roe@psykologi.uio.no)

22  
23 *Running title:* Population-level cortical asymmetry

24 *Keywords:* Lateralization, population neuroscience, lifespan

25 *Open access license:* yes

26  
27 The authors declare no competing interests

## 28 29 30 **Abstract**

31 Cortical asymmetry is a ubiquitous feature of brain organization that is altered in neurodevelopmental disorders, yet we  
32 lack knowledge of how its development proceeds across life in health. Achieving consensus on cortical asymmetries in  
33 humans is necessary to uncover the genetic-developmental mechanisms that shape them and factors moderating cortical  
34 lateralization. Here, we delineate population-level asymmetry in cortical thickness and surface area vertex-wise in 7  
35 datasets and chart asymmetry trajectories across life (4–89 years; observations = 3937; 70% longitudinal). We reveal  
36 asymmetry interrelationships, heritability, and test associations in large-scale data (N=~37,500). Cortical asymmetry was  
37 robust across datasets. Whereas areal asymmetry is predominantly stable across life, thickness asymmetry grows in  
38 development and declines in aging. Areal asymmetry correlates in specific regions, whereas thickness asymmetry is  
39 globally interrelated across cortex in a pattern suggesting highly left-lateralized individuals tend towards left-lateralization  
40 also in population-level right-asymmetric regions (and vice versa). Areal asymmetry is moderately heritable (max  $h^2_{\text{SNP}}$   
41 ~19%), and phenotypic correlations are reflected by high genetic correlations, whereas heritability of thickness  
42 asymmetry is low. Finally, we detected an asymmetry association with cognition and confirm recently-reported  
43 handedness links. Results suggest areal asymmetry is developmentally stable and arises in early life, whereas  
44 developmental changes in thickness asymmetry may lead to directional variability of global thickness lateralization. Our  
45 results bear enough reproducibility to serve as a standard for future brain asymmetry studies.

## 50 **1. Introduction**

51 The brain's hemispheres exhibit high contralateral symmetry<sup>1,2</sup> and homotopic regions are amongst the most genetically  
52 <sup>3-5</sup> and developmentally linked<sup>3,6</sup>. However, structural asymmetry is also a ubiquitous aspect of brain organization<sup>7,8</sup>.  
53 Cortical thickness (CT) and surface area (SA) are known to exhibit distinct asymmetry patterns<sup>7,9</sup>, but these have been  
54 reported inconsistently<sup>7,8,10-20</sup>. Yet disrupted cortical asymmetry is a confirmed feature of neurodevelopmental disorders  
55 <sup>21</sup>, aging<sup>10</sup>, and Alzheimer's disease<sup>10,22</sup>. Hence, achieving consensus on cortical asymmetries and understanding the  
56 genetic-developmental and lifespan influences that shape and alter them is necessary to discover precise biomarkers for  
57 disease. To reach consensus, an atlas-free description of asymmetries that reliably replicate across international samples  
58 (i.e. population-level asymmetries) is needed. This would enable precision mapping of the genetic and individual-specific  
59 factors moderating cortical lateralization, and serve as a high-fidelity phenotype for future studies on brain asymmetry.  
60 Furthermore, it is unknown how cortical asymmetry development proceeds across life, as no previous study has mapped  
61 cortical asymmetry trajectories longitudinally across the lifespan.

62  
63 Although several studies have mapped cortical asymmetry<sup>7,8,18-20,23,10-17</sup>, conflicting results may be partly due to the use  
64 of brain atlases with varying spatial resolutions, especially if asymmetry conforms poorly to the predefined anatomical  
65 boundaries. Still, even amongst studies adopting an atlas-free approach, conflicting results abound<sup>13-18</sup>. For example,  
66 for CT asymmetry, medial prefrontal cortex (mPFC) has been reported to show both extensive rightward<sup>14,16,17</sup> and  
67 leftward<sup>10-12,20</sup> lateralization. Beyond regional inconsistencies, a recent meta-analysis confirmed the cortex is globally  
68 organized in a characteristic pattern of CT asymmetry, wherein anterior and posterior regions are thicker in the left and  
69 right hemisphere, respectively<sup>7</sup>. Notably, while this agrees with some reports<sup>10-12,20,24</sup>, it is less compatible with many  
70 others<sup>8,13-19,25</sup>. Furthermore, that study applied a relatively coarse brain atlas, and there is currently no high-resolution  
71 complement to describe cortical asymmetries that reliably reproduce across international samples (but see<sup>10,24</sup>). For  
72 areal asymmetry, while results have been broadly more consistent<sup>7,8,14,19,23,26</sup>, there nevertheless remain important  
73 discrepancies, such as reports of right-<sup>7,27,28</sup> and left-<sup>14,26</sup> lateralization of superior temporal sulcus (STS).

74  
75 An accurate description of the lifespan trajectories of cortical asymmetry may shed light on mechanisms underlying  
76 diverse aspects of asymmetry across life. For CT, longitudinal increases in asymmetry have been shown during the first  
77 two years of life<sup>11</sup>, with suggestions of rapid asymmetry growth from birth to 1 year<sup>11</sup>, and continued growth until  
78 adolescence<sup>29</sup>. However, previous studies mapped CT asymmetry linearly across cross-sectional developmental and  
79 adult age-ranges<sup>13,20</sup>, mostly concluding CT asymmetry is minimal in infancy and maximal age ~60. In contrast, recent  
80 work established CT asymmetry shows a non-linear decline from 20 to 90 years that is reproducible across aging cohorts  
81 <sup>10</sup>. Thus, although offering viable developmental insights<sup>13,20</sup>, previous lifespan studies of CT asymmetry do not  
82 accurately capture the aging process, and likely conflate non-linear developmental and aging trajectories with linear  
83 models. A longitudinal exploration of the lifespan trajectories of CT asymmetry accounting for dynamic change is needed  
84 to further knowledge of normal brain development.

85  
86 In addition, few studies have charted developmental<sup>26,28</sup> or aging effects<sup>7</sup> on SA asymmetry. However, indirect evidence  
87 suggests SA asymmetry may exhibit little change from birth to 2 years<sup>26</sup> despite rapid and concurrent developmental  
88 cortical expansion<sup>30</sup>. Determining the developmental timing of cortical asymmetry will provide a useful normative  
89 reference, as subtly altered asymmetry in neurodevelopmental disorders suggests early life perturbations in left-right  
90 brain organization contribute to lifelong detriment in brain health<sup>21,31</sup>.

91  
92 Correlations between cortical asymmetries in adults may provide a window on asymmetries formed under common  
93 genetic-developmental influence. Yet while there has been much research on whether asymmetries of various  
94 morphometric measures<sup>8,14,19</sup> or imaging modalities<sup>27</sup> relate to one another, few have focused on interrelationships  
95 between asymmetries derived from the same metric. Where reported, evidence suggests cortical asymmetries are mostly  
96 independent<sup>32,33</sup> – in line with a multifactorial view of asymmetry phenotypes<sup>34-36</sup> – and a recent study found asymmetry  
97 in anatomically connected regions of the cortical language network was no more related than in regions selected at  
98 random<sup>27</sup>. Currently, it is not known whether or how cortical asymmetries correlate within individuals, though this may  
99 suggest coordinated development of left-right brain asymmetries.

100  
101 Altered lateralization has been hypothesized to relate to poorer cognitive outcomes<sup>20,37,38</sup>. In line with this, recent work  
102 suggests genetic overlap between cortical asymmetry, educational attainment, and neurodevelopmental disorders<sup>31</sup>,  
103 and reduced brain torque<sup>25,39,40</sup> – a gross morphological asymmetry with a strong population-level bias – associates  
104 with lower cognition<sup>41</sup>. For CT and SA asymmetry, however, reported asymmetry-cognition associations have been  
105 conflicting<sup>20,42,43</sup> and remain untested in large-scale data. Furthermore, most large-scale studies of the factors  
106 moderating cortical asymmetry have adopted brain atlases offering limited spatial precision<sup>7,31,44</sup>. Accordingly, previous  
107 large-scale studies did not detect associations with handedness<sup>7,45</sup> that were not found until a recent study applied  
108 vertex-wise mapping in big data<sup>24</sup>. Similarly, it is unclear to what degree poor-fitting atlases drive down heritability  
109 estimates of cortical asymmetry<sup>7,31</sup>, as estimates improve when brain measures better conform to the biology under  
110 genetic investigation<sup>46,47</sup>. However, no previous study has assessed heritability after precisely delineating regions of  
111 cortex that are asymmetric at the population level, and cortex-wide heritability maps have all used the same atlas we  
112 propose fits poorly to the asymmetry of cortex<sup>48</sup>.

113  
114 Here, we 1) delineate population-level cortical SA and CT asymmetries using vertex-wise analyses and their overlap in  
115 7 international datasets, and 2) map their trajectories longitudinally across the lifespan. We 3) investigate interregional  
116 asymmetry correlations, asking whether and how asymmetries correlate within individuals. Next, we 4) tested heritability

117 of cortical asymmetry using both an extended twin design and genome-wide single nucleotide polymorphism (SNP) data.  
 118 Finally, we 5) screened our set of robust, population-level asymmetries for association with general cognitive ability,  
 119 handedness, sex, and brain size in UK Biobank (UKB) <sup>49</sup>.

## 123 2. Results

### 124 2.1 Population-level asymmetry of the cerebral cortex

125 First, to delineate cortical regions exhibiting population-level SA and CT asymmetry, we assessed asymmetry vertex-  
 126 wise in 7 independent samples and quantified overlapping effects (Methods). SA asymmetries were markedly consistent  
 127 across all 7 datasets (Fig. 1A): the spatial overlap between AI maps ranged from  $r = .88$  to  $.97$  (Fig. 1C). Across all 7  
 128 datasets (Fig. 1D), strong leftward SA asymmetry was observed in a large cluster in supramarginal gyrus (SMG) that  
 129 spanned the length of postcentral gyrus, extended inferiorly into planum temporale and primary auditory regions and  
 130 conformed markedly to their anatomical boundaries (see Figure 1-figure supplement 1A for significance). We also  
 131 observed consistently strong leftward asymmetry in anterior insula, anterior temporal cortex, rostral anterior cingulate,  
 132 medially in superior frontal cortex, and precuneus, the latter extending the length of parahippocampal gyrus into  
 133 entorhinal cortex. Strong rightward SA asymmetry was consistently evident in cingulate cortex, inferior parietal cortex,  
 134 STS, lateral and medial occipital cortex, and in mPFC and rostral middle frontal cortex (Fig. 1A). The global pattern  
 135 agrees with previous reports <sup>7,23,24</sup>, and effects showed markedly high overlap across datasets (Fig. 1D)

137 For CT, an anterior-posterior pattern of left-right asymmetry was evident in most datasets (Fig. 1B), consistent with recent  
 138 reports <sup>7,10,24</sup>. Though spatial correlations between AI maps were high, they were notably more variable ( $r = .33$  -  $.93$ ;  
 139 Fig. 1C); HCP showed lower correlation with all datasets ( $r = .33$  -  $.46$ ) whereas all other datasets correlated highly with  
 140 each other (min  $r = .78$ ). Strong leftward CT asymmetry was evident in cingulate cortex, postcentral gyrus, and in superior  
 141 frontal cortex – with consistent effects across datasets (Fig. 1E) – and in medial and lateral prefrontal cortex, though the  
 142 latter two were less consistent among datasets. Strong rightward CT asymmetry was consistently evident in a large  
 143 cluster in and around STS and lateral temporal cortex (Fig 1E; Figure 1-figure supplement 1B), insula, lingual gyrus,  
 144 anterior parahippocampal and entorhinal cortex. Both SA and CT asymmetry extended beyond these described effects  
 145 (Figure 1-figure supplements 1-2).

147 Based on effect size criteria (Fig. 1D-E; Methods), we derived a set of robust clusters exhibiting population-level  
 148 asymmetry for SA (14 clusters) and CT (20 clusters) to be used in further analyses (see Supplementary file 1E-F for  
 149 anatomical descriptions, see Figure 1-figure supplement 3 for variances). We then formally compared our approach to  
 150 asymmetry estimates derived from a gyral-based atlas often used to assess asymmetry <sup>7,19,31</sup>, finding fairly poor  
 151 correspondence with the vertex-wise structure of cortical asymmetry, particularly for CT (Figure 1-figure supplement 4).

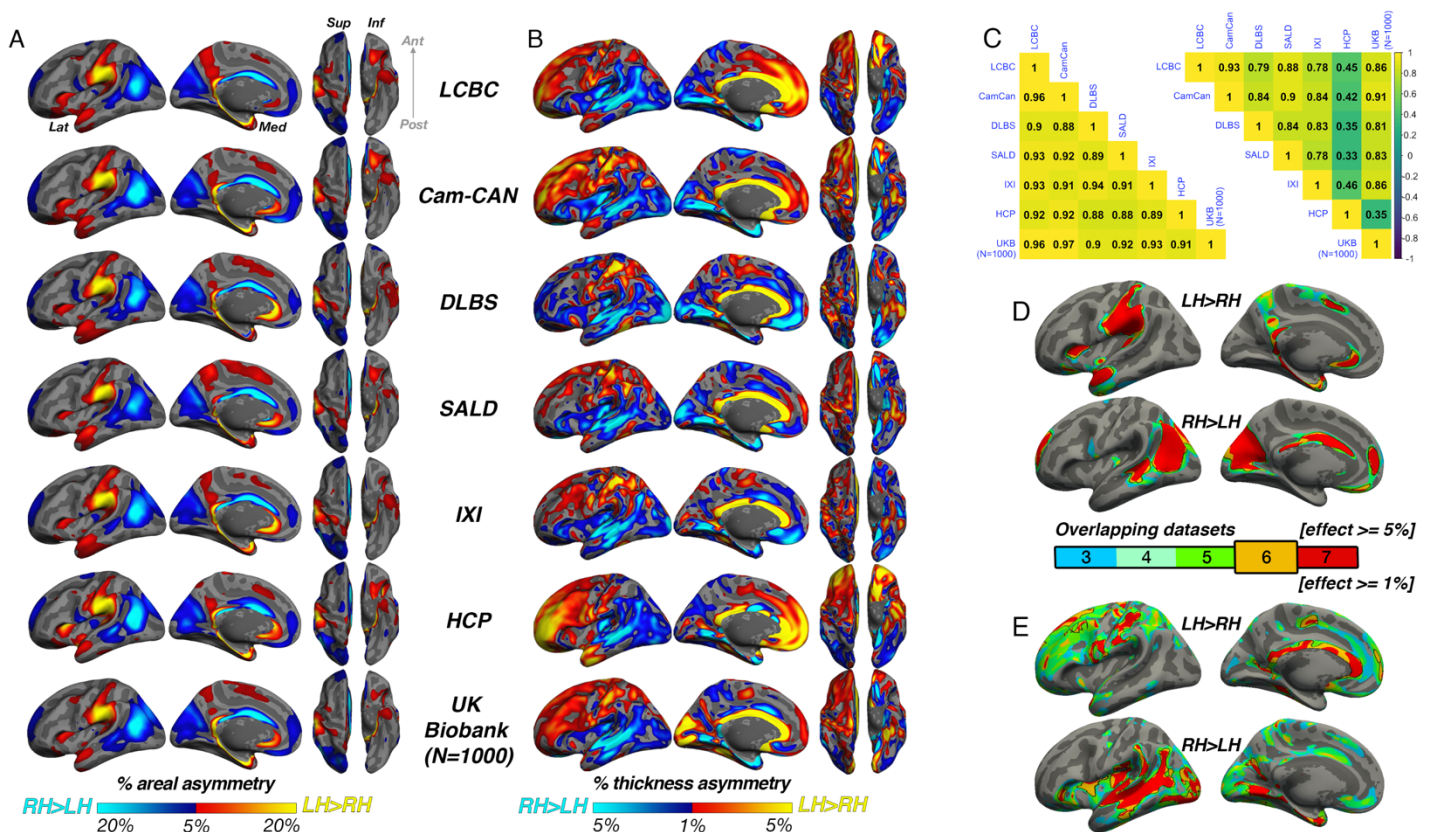

152

153  
154 **Figure 1. A) Mean SA and B) CT asymmetry in each dataset. Warm and cold colours depict leftward and rightward**  
155 **asymmetry, respectively. C) Spatial overlap (Pearson's  $r$ ) of the unthresholded maps between datasets for SA (lower**  
156 **matrix) and CT asymmetry (upper). D) Overlapping effects across datasets were used to delineate clusters exhibiting**  
157 **population-level SA (lower threshold = 5%) and E) CT asymmetry (lower threshold = 1%) based on a minimum 6-dataset**  
158 **overlap (black outlined clusters). Post=posterior; Lat=lateral; Med=medial; Ant=anterior; Sup=superior; Inf=inferior.**  
159

160  
161  
162  
163 **2.2 Lifespan trajectories of cortical asymmetry**  
164 We have recently shown that cortical regions exhibiting age-related reduction of CT asymmetry correspond with regions  
165 exhibiting strong asymmetry on average <sup>10</sup>. Thus, having delineated regions exhibiting population-level SA and CT  
166 asymmetry, we aimed to characterize the trajectories of SA and CT asymmetries longitudinally across the lifespan (4-89  
167 years). To account for potentially non-linear trajectories, we used Generalized Additive Mixed Models (GAMMs) that  
168 enabled modelling the smooth left- (LH) and right hemisphere (RH) age-trajectories within our robust clusters (Methods).  
169

170 In all clusters, SA asymmetry was strongly established already by age ~4 years, and the lifespan trajectories of both  
171 leftward (Fig. 2A) and rightward (Fig. 2B) SA asymmetries were largely parallel. Specifically, a large left-asymmetric  
172 region in and around SMG/perisylvian (#1; Fig. 2A) showed strong asymmetry by age ~4 that was maintained throughout  
173 life through steady aging-associated decline of both hemispheres, whereas leftward asymmetry of temporal cortex (#2,6)  
174 and anterior insular (#4) was maintained through developmental expansion and aging-associated decline of both  
175 hemispheres. Others (retrosplenial #5; mPFC #3,7) showed growth from pre-established asymmetry and more variable  
176 lifespan trajectories. On the other side, rightward asymmetries showed largely preserved asymmetry through aging-  
177 associated decline of both hemispheres (Fig 2B; medial occipital #1; lateral parietal #2; STS #5; orbitofrontal #7), through  
178 bilateral developmental expansion and aging-associated decline (mPFC #6), or steadily expanding bilateral SA until mid-  
179 life (cingulate; #3). Though asymmetry trajectories did show significant change at some point throughout life in most  
180 clusters (Supplementary file 1E), factor-smooth GAMM interaction analyses confirmed that asymmetry was significantly  
181 different from 0 across the entire lifespan in all SA clusters (Figure 3–figure supplements 1-2), and the average  
182 trajectories across all leftward and rightward clusters were clearly parallel (though still exhibited a significant difference;  
183 bordered plots in Fig. 2A-B; Supplementary file 1E).  
184

185 In contrast, though homotopic trajectories of CT clusters were more variable, they were mostly characterized by  
186 developmental increase and aging-associated decrease in asymmetry (i.e. non-parallel lifespan trajectories), through  
187 unequal rates of continuous thinning between the hemispheres from age ~4 (Fig. 3A-B; see Figure 3–figure supplements  
188 1-2). Specifically, leftward CT asymmetry developed through comparatively slower thinning trajectories of the LH,  
189 whereas rightward asymmetry developed through slower RH thinning. In general, asymmetry development was evident  
190 up to a peak around age ~25 for both leftward (Fig. 3A; superior frontal #2; precentral #4, frontal #8,9,10; calcarine #11)  
191 and rightward clusters (Fig 3B; #1-9) and declined thereafter (see also Figure 3–figure supplement 3). Factor-smooth  
192 GAMMs confirmed that the developmental foundation for CT asymmetry was already established by age ~4 (95% of CT  
193 clusters exhibited small but significant asymmetry at age ~4; Figure 3–figure supplement 2B), and again asymmetry  
194 trajectories showed significant change at some point throughout life (Supplementary file 1F). The average trajectories  
195 across all leftward and rightward clusters showed developmental asymmetry increase up to age ~25 and aging-  
196 associated asymmetry decrease from mid to old age (bordered plots; Fig 3). Results were robust to varying the number  
197 of knots used to estimate trajectories (Figure 2–figure supplement 1).

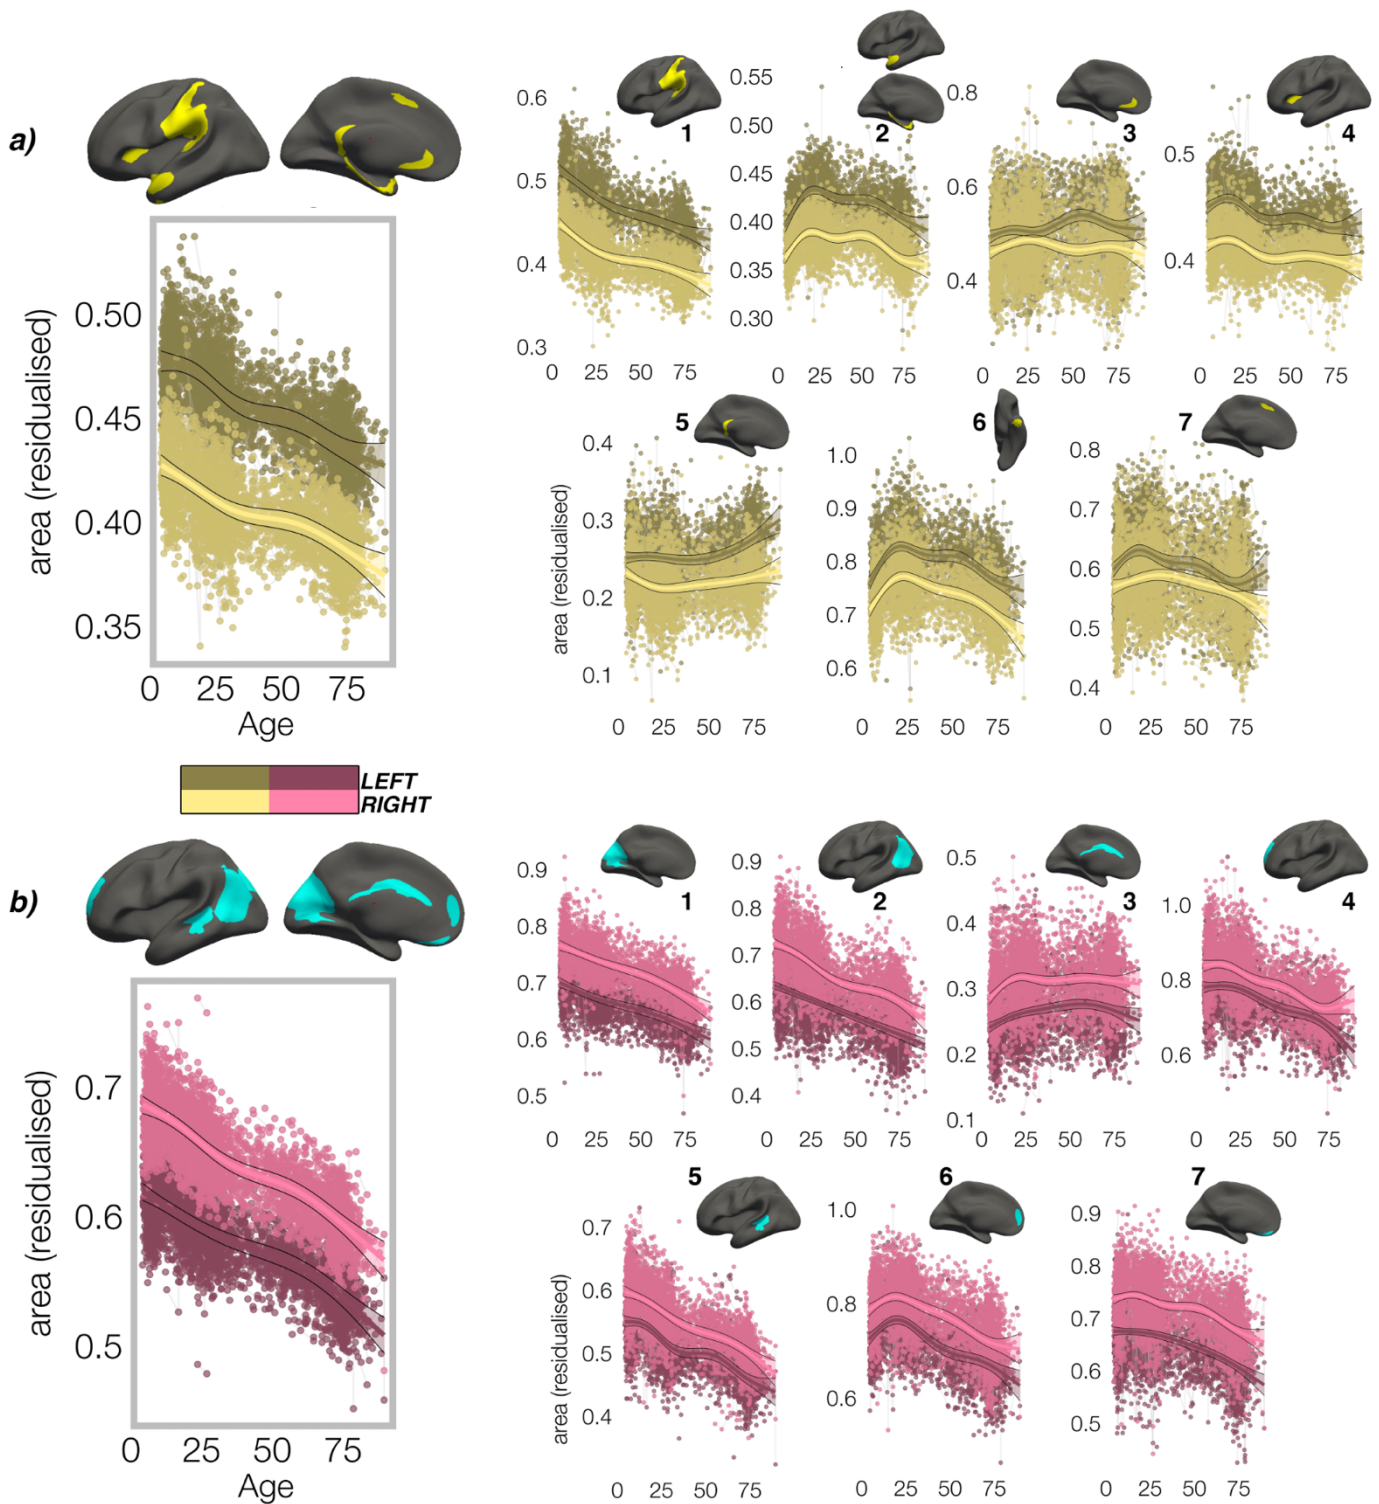

198  
 199  
 200 **Figure 2:** Homotopic lifespan trajectories of SA in clusters exhibiting population-level **a)** leftward (yellow plots; yellow  
 201 clusters) and **b)** rightward (pink plots; blue clusters) areal asymmetry ( $\text{mm}^2$ ). Larger plots on the left show the mean age  
 202 trajectory across all clusters exhibiting leftward (top) and rightward (bottom) asymmetry. Note that the unit of  
 203 measurement is the average surface area of a vertex within the cluster. Dark colours correspond to LH trajectories. All  
 204 age trajectories were fitted using GAMMs. Data is residualized for sex, scanner and random subject intercepts. Clusters  
 205 are numbered for reference.  
 206  
 207  
 208  
 209

210  
211

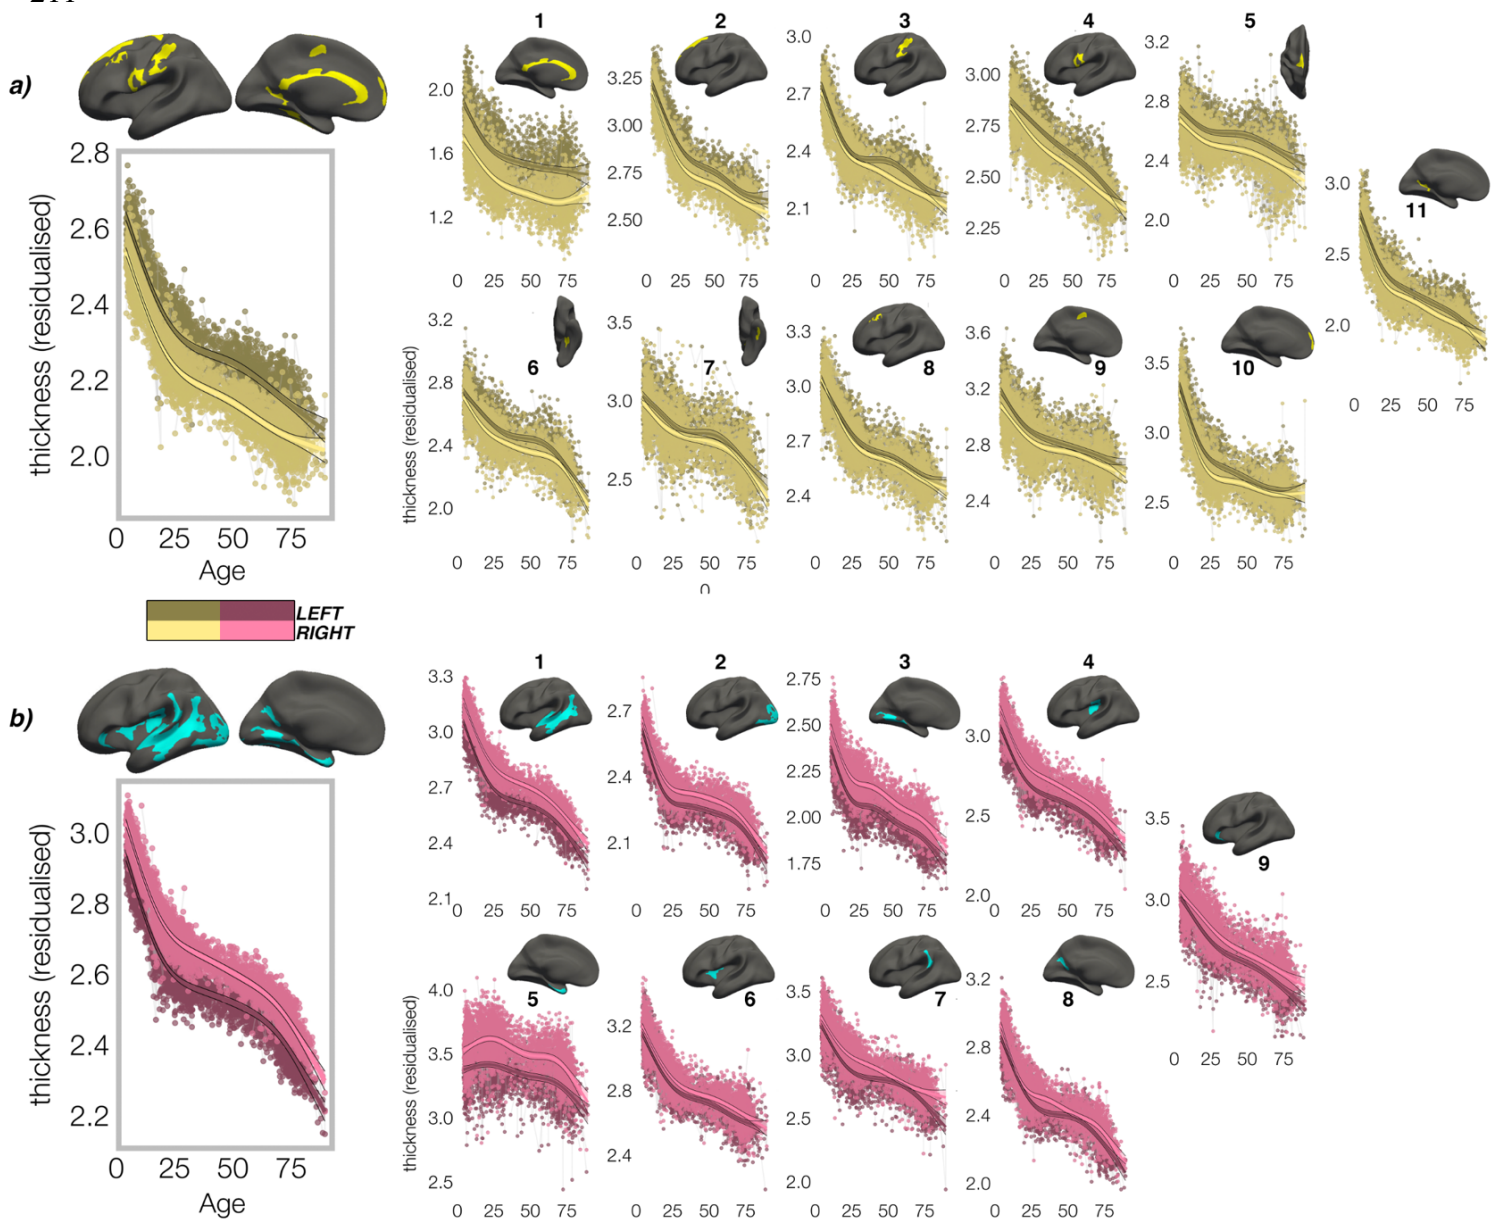

212

213 **Figure 3:** Homotopic lifespan trajectories of CT in clusters exhibiting population-level a) leftward (yellow plots; yellow  
214 clusters) and b) rightward (pink plots; blue clusters) thickness asymmetry ( $\text{mm}^2$ ). Larger plots on the left show the mean  
215 age trajectory across all clusters exhibiting leftward (top) and rightward (bottom) asymmetry. Note that the unit of  
216 measurement is the average surface area of a vertex within the cluster. Dark colours correspond to LH trajectories. All  
217 age trajectories were fitted using GAMMs. Data is residualised for sex, scanner and random subject intercepts. Clusters  
218 are numbered for reference.

219

220

221

222

### 223 2.3 Interregional asymmetry correlations

224 We then investigated whether cortical asymmetry correlates within individuals (Methods).

225

226 For SA, a common covariance structure between asymmetries was detectable across datasets: LCBC, UKB and HCP  
227 all correlated almost perfectly ( $r \geq 0.97$ , all  $p < 9.9 \times 10^{-5}$ ; Fig. 4A; Figure 4-figure supplement 1A). The highest correlations  
228 (or “hotspots”) all reflected positive correlations between regions that are on average left-asymmetric and regions that  
229 are on average right-asymmetric (i.e. higher leftward asymmetry in one region related to higher rightward asymmetry in  
230 another; Fig 3A black outline); leftward asymmetry in SMG/perisylvian (#1L) was related to higher rightward asymmetry  
231 in inferior parietal cortex (#2R;  $r = .46$  [LCBC]), leftward anterior cingulate asymmetry (ACC; #3L) was related to higher

232 rightward asymmetry in mPFC (#6R,  $r = .46$ ), and leftward asymmetry in a superior frontal cluster (#7L) was related to  
 233 rightward asymmetry in the cingulate (#3R,  $r = .67$ ). None of the relationships could be explained by brain size, as  
 234 additionally removing the effect of intracranial volume (ICV) from cluster AI's had a negligible effect on their interrelations  
 235 (max correlation change = 0.003). Post-hoc tests confirmed that opposite-direction asymmetries were more correlated if  
 236 closer in cortex (Methods); geodesic distance was lower between cluster-pairs that were more correlated ( $\rho = -.37$ ,  $p$   
 237  $= .01$  [LCBC];  $-.38$ ,  $p = .007$  [UKB; Fig. 4C];  $-.32$ ,  $p = .02$  [HCP]), though this was driven by the aforementioned "hotspots".  
 238 By contrast, same-direction SA asymmetries were not more correlated if closer in cortex (leftward [all  $p > .5$ ]; rightward  
 239 [all  $p > .5$ ]). This suggests specific SA asymmetries that are closer in cortex and opposite in direction may show  
 240 coordinated development.

242 For CT asymmetry, the correlation matrix exhibited a clear pattern in UKB that was less visible but still apparent in LCBC  
 243 and HCP (Fig. 4B; Figure 4-figure supplement 1B). Mantel tests confirmed that the covariance structure replicated  
 244 between all dataset-pairs (LCBC-UKB  $r = .43$ ,  $p = .01$ ; LCBC-HCP  $r = .45$ ,  $p = .005$ ; UKB-HCP  $r = .46$ ,  $p = .01$ ). The  
 245 observed pattern suggested higher leftward asymmetry in regions that are on average left-asymmetric was associated  
 246 with less rightward asymmetry in regions that are on average right-asymmetric. However, given that the AI measure is  
 247 bidirectional, closer inspection of the correlations revealed that higher leftward asymmetry in regions that are left-  
 248 asymmetric actually corresponded to more *leftward* asymmetry in right-asymmetric regions, and vice versa (and on  
 249 average; see Figure 4-figure supplement 2). In other words, individuals may tend towards either leftward lateralization  
 250 or rightward lateralization (or symmetry) on average, irrespective of the region-specific direction of mean asymmetry in  
 251 the cluster. Similarly, asymmetry in left-asymmetric regions was mostly positively correlated, and asymmetry in right-  
 252 asymmetric regions was mostly positively correlated. Again, additionally removing ICV-associated variance had  
 253 negligible effect (max correlation change = 0.007). Post-hoc principal components analysis (PCA) in UKB revealed PC1  
 254 explained 21.9% of the variance in CT asymmetry and strongly suggested a single global factor for CT asymmetry (Fig.  
 255 4D). Accordingly, we found a strong correlation between mean asymmetry across all leftward vs. mean asymmetry across  
 256 all rightward clusters in UKB ( $r = -.61$ ,  $p < 2.2 \cdot 10^{-16}$  [means weighted by cluster size]; see Fig. 4D;  $r = -.56$ ,  $p < 2.2 \cdot 10^{-16}$  [unweighted raw means];  
 257  $r = .66$ ,  $p < 2.2 \cdot 10^{-16}$  [PC1 across all leftward vs. PC1 across all rightward];  $r = -.56$ ,  $p < 2.2 \cdot 10^{-16}$  [spatial average across vertices]). Though less strong, all  
 258 relationships were significant in LCBC ( $r = -.10$ ;  $p = 1.3 \cdot 10^{-4}$  [weighted];  $r = -.05$ ;  $p = .03$  [unweighted];  $r = .17$ ;  $p = 2.00 \cdot 10^{-11}$  [PC1 vs. PC1];  
 259  $r = -.05$ ;  $p = .04$  [spatial average]) and significant or trend-level in HCP ( $r = -.11$ ;  $p = 1.6 \cdot 10^{-4}$  [weighted];  $r = -.04$ ;  $p = .15$  [unweighted];  $r =$   
 260  $.13$ ,  $p = 2.31 \cdot 10^{-5}$  [PC1 vs. PC1];  $r = -.05$ ;  $p = .07$  [spatial average]; see Figure 4-figure supplement 3). Opposite-direction CT  
 261 asymmetries that were closer in cortex were more negatively correlated in LCBC ( $\rho = .29$ ,  $p = .003$ ) but not HCP ( $p =$   
 262  $.33$ ) or UKB ( $p = .84$ ), whereas CT asymmetry in left-asymmetric ( $\rho = -.40$ ,  $p = .003$  [LCBC];  $\rho = -.44$ ,  $p = 8.1 \cdot 10^{-4}$  [UKB],  
 263  $\rho = -.28$ ,  $p = .04$  [HCP]) and right-asymmetric ( $\rho = -.34$ ,  $p = .04$  [LCBC];  $\rho = -.48$ ,  $p = .003$  [UKB],  $\rho = -.58$ ,  $p =$   
 264  $2.0 \cdot 10^{-4}$  [HCP]) regions was more positively correlated in cluster-pairs that were closer in cortex. These results suggest CT

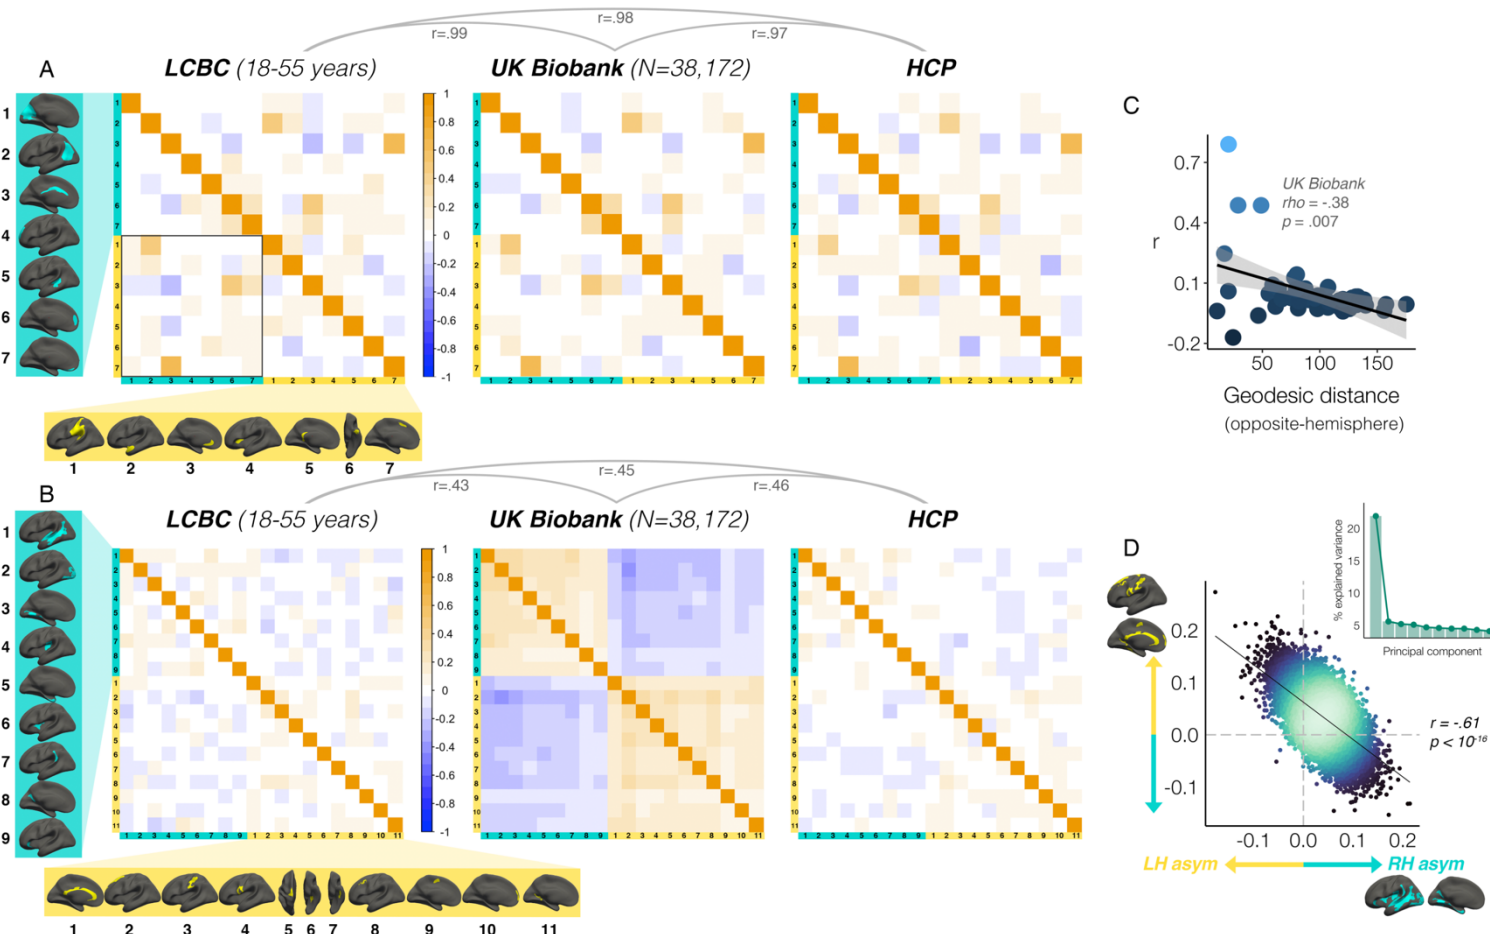

265 asymmetry is globally interrelated across the cortex and shows high directional variability in the adult population.

266  
267  
268 **Figure 4:** Interregional correlations between **A)** SA asymmetries and **B)** CT asymmetries for each replication dataset  
269 (AI's residualized for age, sex, scanner). AI's in rightward clusters are inverted, such that positive correlations denote  
270 positive asymmetry-asymmetry relationships regardless of direction. Yellow and blue brain clusters/colours denote  
271 leftward and rightward asymmetries, respectively (clusters numbered for reference). A consistent covariance structure  
272 was evident both for SA ( $r \geq .97$ ) and CT asymmetry ( $r \geq .43$ ; results above matrices). Black box in A highlights  
273 relationships between opposite-direction asymmetries (i.e. leftward vs rightward regions). **C)** For SA, opposite-direction  
274 cluster-pairs that were closer in cortex were more positively correlated (datapoints show cluster-pairs). **D)** A single  
275 component explained 21.9% variance in CT asymmetry in UKB (inset plot). Accordingly, we found a strong correlation ( $r$   
276 =  $-.61$ ;  $p < 10^{-16}$ ) in UKB between mean asymmetry across leftward clusters (Y-axis) vs. mean asymmetry across  
277 rightward clusters (X-axis; AI's in rightward clusters inverted). Lines of symmetry (0) are in dotted grey (see also [Figure](#)  
278 [4-figure supplements 1-3](#)).

279  
280  
281 **2.4 Heritability**  
282 Heritability of global AI measures was low and only significant for SA asymmetry in UKB (SA  $h^2_{\text{SNP}} = .07$  [95% CI =  $.03 -$   
283  $.10$ ];  $p = 2.16e^{-4}$ ; CT  $h^2_{\text{SNP}} = .01$  [ $-.02 - .05$ ];  $p = .22$ , [Supplementary file 1G](#)). For SA, only two clusters showed significant  
284 heritability in HCP and these did not survive multiple comparison correction. In contrast, SNP-based analyses revealed  
285 71% (10/14) of SA asymmetry clusters exhibited significant heritability ([Supplementary file 1H](#)). Importantly, highest  
286 heritability was observed for leftward SA in the anterior insula cluster ( $h^2_{\text{SNP}} = 18.6\%$ ,  $p < 10^{-10}$ ; see note in [Supplementary](#)  
287 [file 1H](#)), which was substantially higher than the next highest estimates in SMG/perisylvian ( $h^2_{\text{SNP}} = 10.7\%$ ,  $p = 3.01e^{-9}$ ),  
288 retrosplenial cortex, gyrus rectus and the cingulate (all  $h^2_{\text{SNP}} = 8-10\%$ ). For CT, no cluster survived in HCP, only 3/20  
289 (15%) clusters exhibited significant SNP-heritability, and estimates were lower ( $h^2_{\text{SNP}} = 3-7\%$ ; [Supplementary file 1I](#)).

290  
291 We then estimated cortex-wide heritability using a fine-grained parcellation<sup>50</sup> ([Fig. 5](#)). For SA, though no parcels survived  
292 correction in HCP, 53% (267/500) of parcels exhibited significant SNP-heritability (post-correction) in UKB ( $p[\text{FDR}] < .05$ ;  
293 black outlines in [Fig. 5A](#); parcels with suggestive significance in HCP [also in black outline] survived correction in UKB).  
294 Beyond significance, a consistent heritability pattern for SA asymmetry was clearly evident in both samples, notably in  
295 anterior insula, SMG, Sylvian fissure, STS, calcarine sulcus, cingulate, medial and orbitofrontal cortex, and fusiform  
296 (spatial correlation between maps;  $r = .38$ ;  $p < 10^{-16}$ ). Importantly, maximum SNP-heritability (yellow parcel in [Fig. 5](#)) was  
297 observed in anterior insula (parcel  $h^2_{\text{SNP}} = 16.4\%$ ;  $p < 10^{-10}$ ), confirming this region constitutes the most heritable cortical  
298 asymmetry in humans (and not improving on the cluster-wise estimate). For CT, we observed little overlap in heritability  
299 estimates between datasets (spatial correlation was significant but low;  $r = .12$ ;  $p = .01$ ). Significant FDR-corrected SNP-  
300 heritability was observed in 11% (57/500) of parcels, including around superior temporal gyrus, planum temporale, the  
301 posterior insula/Sylvian fissure, anterior insula, and in orbitofrontal cortex (max  $h^2_{\text{SNP}} = 16.6\%$ ), along the cingulate and  
302 in medial visual cortex. However, SNP-heritability for CT asymmetry was substantially lower ( $\beta = -0.71$ ,  $p < 2e^{-16}$ ), and  
303 higher estimates pertained to regions that were limited in extent but showed no clear global pattern.

304  
305 For SA, large genetic correlations explained several phenotypic correlations in [Fig. 4A](#) ([Fig. 5C](#)): high genetic correlations  
306 were found between leftward asymmetry in SMG/perisylvian and higher rightward asymmetry in lateral parietal cortex  
307 (LPC;  $r_G = .83$ ;  $p[\text{FDR}] = 7.76e^{-05}$ ), between leftward superior frontal cortex asymmetry and rightward asymmetry along  
308 the cingulate ( $r_G = .82$ ;  $p[\text{FDR}] = 1.36e^{-02}$ ), and between leftward anterior temporal/parahippocampal asymmetry and  
309 rightward asymmetry in LPC ( $r_G = .68$ ;  $p[\text{FDR}] = 1.36e^{-02}$ ). Genetic correlations between anterior insula and two rightward  
310 superior frontal clusters were also observed ( $r_G = .86$ ;  $p[\text{FDR}] = 1.41e^{-06}$ ;  $r_G = 0.42$ ;  $p[\text{FDR}] = 7.74e^{-04}$ ) in the absence  
311 of phenotypic correlations ([Fig. 4](#)), and several same-direction asymmetries showed moderate genetic correlation. For  
312 CT, one cluster-pair survived FDR-correction (see [Fig. 5C](#);  $r_G = 0.68$ ;  $p[\text{FDR}] = 3.03e^{-02}$ ).

313



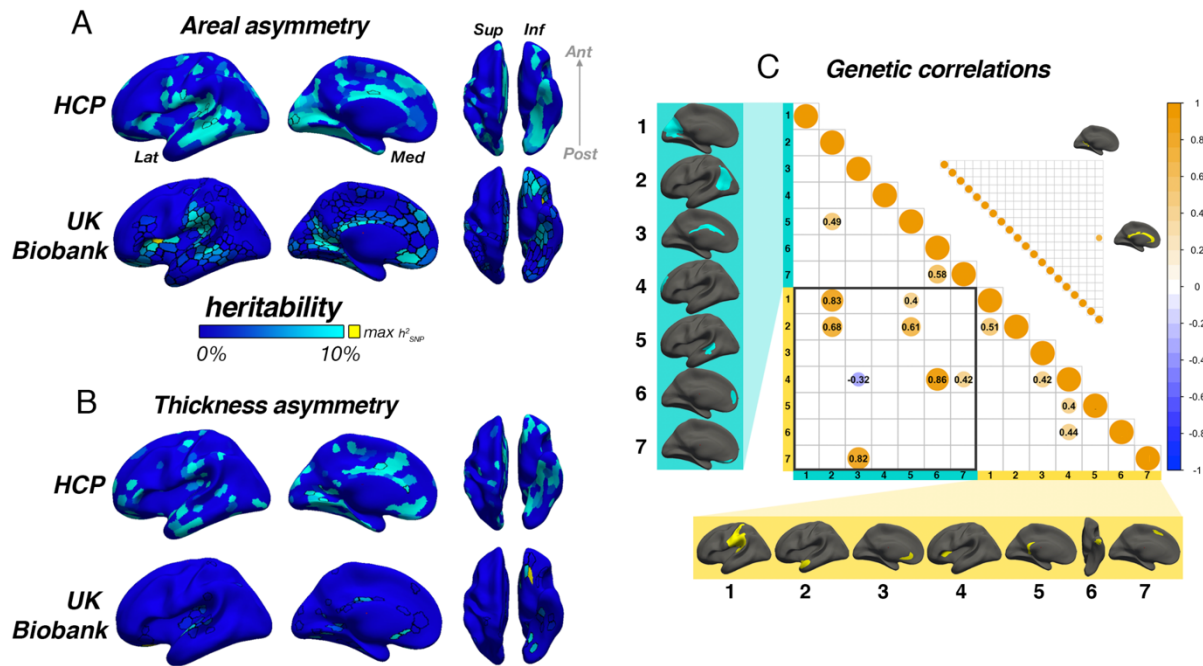

314  
 315 **Figure 5.** Heritability of SA (A) and CT asymmetry (B) estimated cortex-wide in HCP (top row) and UKB (bottom).  
 316 Unthresholded effect maps are shown. In HCP, no parcel survived FDR-correction, whereas for UKB, 53% of SA and  
 317 11% of CT parcels survived. Parcels in black outline show significance at  $p < .05$  (uncorrected) for HCP, and at  $p[FDR] < .05$   
 318 for UKB. Yellow parcels depict maximum SNP-heritability (SA  $h^2 = 16.4\%$ ; CT  $h^2 = 16.6\%$ ). C) SNP-based genetic  
 319 correlations between SA (lower matrix) and CT asymmetries (upper). For SA, genetic correlations explained several  
 320 phenotypic correlations (Fig. 4A). For CT, one pair survived FDR-correction (shown). AI's in rightward clusters were  
 321 inverted such that positive genetic correlations denote asymmetry-asymmetry genetic relationships regardless of  
 322 direction. Yellow and blue brain clusters/colours denote population-level leftward and rightward asymmetries,  
 323 respectively (clusters numbered for reference).

324  
 325  
 326 **2.5 Associations with Cognition, Handedness, Sex, and ICV**  
 327 Several significant associations were observed between factors-of-interest and asymmetry in our clusters (Fig. 6;  
 328 Supplementary file 1J-K). Notably, all effect sizes were small. For general cognitive ability, we found one association:  
 329 higher SA asymmetry in the largest leftward cluster (SMG/perisylvian) was significantly associated with better cognition  
 330 ( $\beta = .03$  [CI = 0.02 – 0.04],  $p = 4.1e^{-7}$ ). This was checked in the substantially reduced non-imputed subset of data with no  
 331 missing cognitive variables and retained the lowest  $p$ -value ( $N = 4696$ ;  $\beta = 0.04$  [CI = 0.01 - 0.07];  $p = 6.9e^{-3}$ ). For  
 332 handedness, reduced leftward SA asymmetry in anterior insula and CT asymmetry along postcentral gyrus was found in  
 333 left-handers, in line with our recent vertex-wise mapping in UKB<sup>24</sup>. For sex effects, which were also small, males typically  
 334 exhibited slightly stronger SA asymmetry in large clusters (e.g. leftward SMG/perisylvian and temporal pole; rightward  
 335 inferior parietal and superior frontal) but reduced leftward and rightward asymmetry in mPFC. For CT, males exhibited  
 336 more rightward asymmetry in STS and posterior insula, more leftward CT asymmetry in superior frontal cortex, but  
 337 reduced rightward CT asymmetry in entorhinal cortex and anterior insula, and reduced leftward asymmetry in caudal  
 338 superior frontal cortex. As ICV effects were typically most nominal, these are shown in Figure 6–figure supplement 1.  
 339

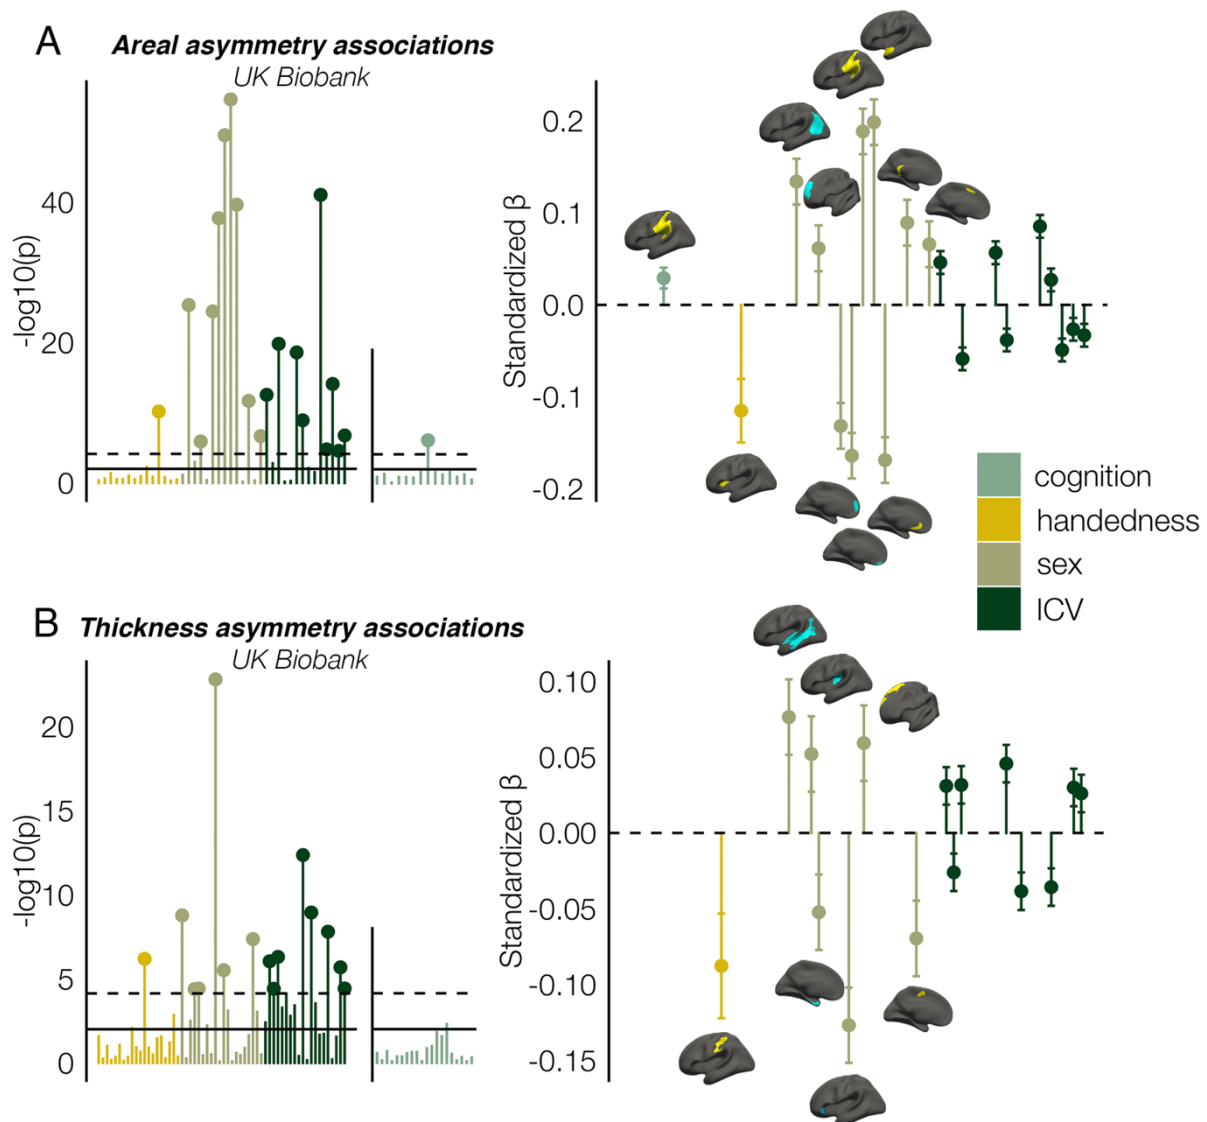

340  
341  
342 **Figure 6.** Associations with general cognitive ability (first principal component), Handedness, Sex, and estimated  
343 intracranial volume (ICV) in UKB, in clusters exhibiting population-level **A**) SA and **B**) CT asymmetry. Left plots denote  
344 significance (negative logarithm; corrected [ $p < 7.3e^{-5}$ ] and uncorrected threshold [ $p = .01$ ] shown by dotted and non-  
345 dotted line, respectively). X-axis displays the test for each cluster-association. As maximum sample size was used to test  
346 each association (Handedness, Sex and ICV:  $N=37,570$ ), effects on cognition were tested in separate models with fewer  
347 observations ( $N = 35,199$ ; separated association plots). Right plots denote effect sizes, 95% confidence intervals (error  
348 bars) and cortical location of associations surpassing Bonferroni-corrected significance. Right handers and females are  
349 coded 0, such that a negative effect for handedness / sex / ICV / cognition denotes less asymmetry in left handers /  
350 males / larger brains / higher cognition. Associations with ICV are shown in Figure 6-figure supplement 1. Yellow and  
351 blue clusters denote leftward and rightward asymmetries, respectively.

352  
353  
354  
355 **3. Discussion**

356 We provide a reference for population-level cortical asymmetries using 7 international datasets and offer the first  
357 description of the longitudinal lifespan trajectories of cortical asymmetry. Our results demonstrate the replicable  
358 interregional relationships between asymmetries within individuals, provide the most detailed heritability maps for cortical  
359 asymmetry to date, uncover novel and confirm previously-reported associations with factors reportedly related to  
360 asymmetry, and further knowledge on normal brain development. All maps are available at neurovault.org/XXXX.

361  
362 Our vertex-wise description of cortical asymmetries that reproduce across cohorts replicates and completes a recent low-  
363 resolution meta-analysis <sup>7</sup>, and can serve as a high-fidelity phenotype for future brain asymmetry studies. The marked  
364 consistency across samples here suggests consensus may now be reached regarding cortical asymmetry phenotypes  
365 in humans, as our results agree with most of the literature <sup>7,8,14,19,23,26,28</sup>, including a recent large-scale mapping in mid-

366 old age<sup>24</sup>. This consensus, along with the genetic findings presented herein, suggests genetic-developmental programs  
367 regulate mean brain lateralization with respect to SA, and the trajectories observed here suggest this form of cerebral  
368 asymmetry is maintained throughout life and formed early on – likely *in utero*<sup>26,31</sup>. For CT asymmetry – for which findings  
369 have been particularly mixed<sup>7,8,18–20,10–17</sup> – the left-right patterning observed here is compatible with recent reports<sup>10,24</sup>,  
370 studies examining CT asymmetry from birth<sup>11</sup>, global meta-analyses<sup>7</sup>, reports using alternative analysis streams<sup>11,20</sup>,  
371 anatomical asymmetries evident early in ontogeny<sup>51,52</sup>, and leftward CT asymmetry overlapping language<sup>53</sup> and motor-  
372 related regions<sup>54,55</sup>. This consistency across adult samples may also indicate that mean CT asymmetry is genetically  
373 regulated at the population-level in humans. However, our findings of development and decline of CT asymmetry across  
374 life<sup>10</sup>, higher directional variability in adult samples and lower heritability converge to suggest CT asymmetry may be  
375 more prone to lifespan change, potentially more malleable to life experience, and susceptible to lifespan accumulation  
376 of insult. Though it remains possible CT asymmetry change could be genetically regulated into old age, this interpretation  
377 agrees with work suggesting SA may trace to prenatal factors<sup>56,57</sup> whereas CT relates more to postnatal lifespan  
378 influences<sup>57,58</sup>.

379  
380 Conceivable sources of previously inconsistent results may be the age-distribution under study<sup>10</sup> and the existence of  
381 varying directional asymmetries within the population (for CT asymmetry). This may partly explain why CT asymmetry  
382 metrics are more variable across datasets compared with SA<sup>7</sup>, though CT asymmetry effects are also smaller<sup>8,14,19</sup> and  
383 likely contain more measurement error. Varying directional asymmetry within atlas-based parcels may also explain  
384 inconsistent reports, such as in insular cortex where we observed consistent but discrepant asymmetry to that reported  
385 in ENIGMA<sup>7</sup>. However, this does not account for the discrepancy that studies using the same atlas<sup>48</sup> typically report  
386 areal asymmetry in STS to be left-lateralized<sup>7,27,28</sup>, as the right-lateralization evidenced here and elsewhere<sup>14,26</sup> seems  
387 unambiguous. And although we did not find strong SA asymmetry in inferior frontal regions as reported by Kong et al<sup>7</sup>,  
388 both the unthresholded significance maps and standard parcellation analyses were compatible with this (Figure 1–figure  
389 supplement 2, Figure 1–figure supplement 5). The high overlap in effects between 7 datasets from 4 countries suggests  
390 our results likely apply universally, though future studies will be needed to confirm this in non-American/North European  
391 samples.

392  
393 Our longitudinal description of cortical asymmetry lifespan trajectories gleaned novel insight into normal brain  
394 development. For SA, adult-patterns of lateralization were strongly established already before ~4 years, indicating SA  
395 asymmetry traces back further and does not primarily emerge through later cortical expansion<sup>59</sup>. Rather, the lifespan  
396 trajectories predominantly show stability from childhood to old age, as SA asymmetry was generally maintained through  
397 periods of developmental expansion and aging-associated change that were region-specific and bilateral. This agrees  
398 with evidence indicating SA asymmetry is primarily determined *in utero*<sup>26</sup>, and indirect evidence suggesting little change  
399 in SA asymmetry from birth to 2 years despite rapid and concurrent cortical expansion<sup>26,30,59</sup>. It may also fit with the  
400 principle that the primary microstructural basis of SA<sup>60</sup> – the number of and spacing between cortical minicolumns – is  
401 determined in prenatal life<sup>58,60</sup>, and agree with evidence suggesting asymmetry at this microstructural level may underly  
402 hemispheric differences in SA<sup>61</sup>. The developmental trajectories agree with studies indicating SA asymmetry is  
403 established and strongly directional early in life<sup>26,28</sup>. That anatomical change in later development specifically in SA  
404 follows embryonic gene expression gradients may also agree with a prenatal account for SA asymmetry<sup>58</sup>. These results  
405 may therefore constrain the extent to which SA asymmetry can be viewed as a plastic feature of brain organization, and  
406 may even suggest SA asymmetry may sometimes be a marker for innate hemispheric specializations shared by most  
407 humans. The high degree of precision with which leftward SA asymmetry follows the contours of auditory-related regions  
408 in the Sylvian fissure (Figure 1–figure supplement 1) which show left functional lateralization in humans may be one  
409 example<sup>61–63</sup>.

410  
411 In stark contrast, although weak CT asymmetry was evident by age 4, we observed considerable developmental growth  
412 and lifespan change in CT asymmetry thereafter. Developmental trajectories showed non-linear asymmetry growth by  
413 virtue of accelerated thinning of the non-dominant hemisphere, and led to maximally established asymmetry around ~25  
414 years of age. These trajectories clearly suggest differentiation of the cortex is occurring with respect to CT asymmetry in  
415 development, possibly, though not necessarily, suggesting CT asymmetry may be more amenable to experience-  
416 dependent plastic change. Still, as cortical thinning in childhood is thought to partly reflect likely learning-dependent  
417 processes such as intracortical myelination<sup>64</sup> and possibly pruning of initially overproduced synapses<sup>65,66</sup> and neuropil  
418 reduction, CT asymmetry may reflect hemispheric differences in the developmental optimization of cortical networks at  
419 least partly shaped by childhood experience. This raises the possibility CT asymmetry may be a marker of ontogenetic  
420 hemispheric specialization within neurocognitive networks. Our findings in development agree with work finding a similar  
421 left-right CT asymmetry pattern shows rapid asymmetry increase in the first years of life<sup>11</sup>, with especially rapid increase  
422 in leftward mPFC<sup>11</sup>. As we also observed rapid differentiation in mPFC that spanned across childhood and adolescence  
423 (Fig. 3; Figure 3–figure supplement 3), we extend these earlier findings in neonates<sup>11</sup>. As prefrontal CT asymmetry  
424 seems particularly vulnerable in neurodevelopmental disorders<sup>21</sup>, aging, and Alzheimer's disease<sup>10</sup>, these trajectories  
425 may provide a useful normative reference. With regards to aging, most clusters exhibited the expected aging-associated  
426 reduction of CT asymmetry we have previously shown is a feature of aging in heteromodal cortex<sup>10</sup>. The differentiation  
427 and dedifferentiation of CT asymmetry at either end of life we show here underscores its proposed role in supporting  
428 optimal brain organization and function.

429  
430 For SA asymmetry, we uncovered a covariance structure that almost perfectly replicated across datasets. In general,  
431 this fit with a multifaceted view<sup>27,34,35</sup>, in which most asymmetries were either not or only weakly correlated, but reliably  
432 so. However, we identified several regions wherein SA asymmetry reliably correlated within individuals, showing the

433 variance in cortical asymmetries is not always dissociable, as often thought <sup>27,34,35</sup>. The strongest relationships all  
434 pertained to asymmetries that were proximal in cortex but opposite in direction. Several of these were underpinned by  
435 high asymmetry-asymmetry genetic correlations, illustrating cerebral lateralizations in SA that are formed under common  
436 genetic-developmental influence, and in agreement with likely prenatal origins for SA asymmetry <sup>26,60</sup>.

437  
438 For CT asymmetry, we also uncovered a common covariance structure – particularly clear in UKB – that nevertheless  
439 replicated with moderate precision across datasets. Furthermore, a single global factor explained a relatively high  
440 proportion of variance in CT asymmetry in UKB, and a strong correlation across 38,172 individuals further suggested CT  
441 asymmetry is globally interrelated across the cortex (Fig. 4D). These data for CT indicate individuals tend towards either  
442 leftward asymmetry, rightward asymmetry, or symmetry, both globally across the cortex and irrespective of the region-  
443 specific average direction of asymmetry (Figure 4–figure supplements 2-3). This result seems in broad agreement with  
444 the notion that some lateralized genetic-developmental programs may trigger lateralization in either direction <sup>35</sup> or lose  
445 their directional bias through environmental interaction <sup>35</sup>. As CT asymmetry seems established at but minimal from birth  
446 <sup>11</sup>, genetic effects may determine the average region-specific hemispheric bias in the population, but developmental  
447 change may subsequently confer major increases upon its directional variance <sup>35</sup>. Overall, the evidence converges to  
448 suggest a high degree of developmental change may shape CT asymmetry and lead to higher directional variability in  
449 the population. Thus, far from being independent phenotypes <sup>27,34</sup>, CT asymmetries may be globally interrelated across  
450 the cortex and their direction coordinated through development.

451  
452 For SA asymmetry, we found replicable patterns of moderate heritability across datasets and across twin and genomic  
453 methods. We also found SA asymmetry in the anterior insula is, to our knowledge, the most heritable brain or behavioural  
454 asymmetry yet reported with genomic methods <sup>31,67,68</sup>, with common SNPs explaining ~19% variance. This is a  
455 substantial improvement on our recent report of < 5% <sup>24</sup>, and illustrates a benefit of our data-driven population-mapping  
456 approach. As we reported recently <sup>24</sup>, we confirm asymmetry in this region associates with handedness (see below).  
457 Furthermore, highest SNP-heritability for SA was found in all regions that constitute the earliest emerging cortical  
458 asymmetries *in utero* <sup>51,69–71</sup>: anterior insula, STS, PT, medial occipital cortex, and parahippocampal gyrus (Fig. 6A). Still,  
459 we found most SA asymmetries exhibited significant – albeit often lower – heritability, as did most parcels when estimated  
460 cortex-wide, and significant heritability was also evident in regions not found in the present analyses to show strong SA  
461 asymmetry, such as Broca’s area (but see Figure 1–figure supplement 5). These effects agree with and elaborate on two  
462 genetic explorations using atlas-based methods <sup>7,31</sup> and reports of heritable SA asymmetry in handedness-associated  
463 clusters <sup>24</sup>. By contrast, CT asymmetry was generally not heritable, or showed low and localized heritability effects. We  
464 also observed divergent results using twin and genomic methods for CT, possibly due to low-power for twin-models,  
465 though we note the SNP-based effects we observed were somewhat in agreement with a previous twin study <sup>7</sup>. Overall,  
466 these reproducible results can guide phenotypic selection in future genomic and biological studies on cerebral laterality.

467  
468 Considered together, lifespan stability possibly from birth <sup>26</sup>, less interindividual directional variability, higher heritability,  
469 and phenotypic and genetic correlations all converge to suggest comparatively higher genetic influence upon SA  
470 asymmetry and possibly limited plasticity. This agrees with work showing genetic variants associated with (mostly SA)  
471 asymmetry are primarily expressed in prenatal life <sup>31</sup>. By contrast, developmental change, high interindividual directional  
472 variability and low heritability for CT asymmetry may fit a scenario whereby CT asymmetry may be more responsive to  
473 postnatal individual exposures <sup>58</sup>, or driven by random developmental influences <sup>72</sup>. Whether region-specific CT  
474 asymmetry-change relates to the maturation of lateralized brain functions <sup>72,73</sup> will be an important question for future  
475 research. Regardless, our results support a relative prenatal-postnatal developmental dichotomy for SA and CT  
476 asymmetry.

477  
478 Screening asymmetries for association with cognition revealed one region – SMG/perisylvian – wherein higher leftward  
479 asymmetry related to higher cognition. Across all samples tested, this cluster was consistently the most lateralized, with  
480 ~95% directional concordance (Figure 1–figure supplement 3), suggesting highly regulated genetic-developmental  
481 programs shape its laterality in humans. Asymmetry here is likely related to brain torque <sup>25,40</sup>, a gross anatomical twist of  
482 the hemispheres leading to interhemispheric anatomical differences especially around the Sylvian fissure <sup>25</sup>. Given that  
483 brain torque also represents a population-level norm <sup>74</sup>, this result suggests disruptions in prenatal cerebral lateralization  
484 may lead to cognitive deficits detectable in later life, and agrees with recent work suggesting brain torque may be related  
485 to cognitive outcomes <sup>41,74</sup>. That this was found specifically in the most lateralized SA cluster may agree with work  
486 suggesting general cognitive abilities that show inter-individual stability across life <sup>75,76</sup> relate primarily to SA phenotypes  
487 that depend mostly on prenatal factors <sup>56,58</sup>.

488  
489 Consistent with our recent vertex-wise analysis in UKB <sup>24</sup>, we confirmed leftward SA asymmetry of the anterior insula,  
490 and leftward CT asymmetry of somatosensory cortex, is subtly reduced in left handers. Sha et al. <sup>24</sup> reported shared  
491 genetic influences upon handedness and cortical asymmetry in anterior insula and other more focal regions not identified  
492 with the approach used here. Anterior insula lies within a left-lateralized functional language network <sup>77</sup>, and its structural  
493 asymmetry may relate to language lateralization <sup>33,78,79</sup> in which left-handers show increased incidence of atypicality  
494 <sup>45,80,81</sup>. Together with observations that its asymmetry emerges early *in utero* <sup>69</sup>, we agree with others <sup>33</sup> that future  
495 research will find this ontogenetically foundational region of cortex <sup>82,83</sup> a fruitful line of inquiry for understanding genetic-  
496 developmental mechanisms influencing laterality phenotypes. Leftward CT asymmetry reduction in somatosensory  
497 cortex in left handers also echoes our recent report, where it was suggested to reflect plastic adaptation to an already-  
498 established hand preference <sup>24</sup>. We extend these results by showing CT asymmetry both postcentrally and in general  
499 shows developmental differentiation and lifespan change. Given this region overlaps with functional representations of

500 the hands <sup>54,55,84</sup> – as in Sha et al. <sup>24</sup> – and our approach also detected no significant heritability, these findings may also  
501 fit a scenario whereby CT asymmetries are amenable to alteration through use-dependent plasticity and possibly carry  
502 information regarding group-level hemispheric specializations of function. However, the small effects cast doubt on the  
503 utility of cortical asymmetry to predict individual hand preference.

504  
505 Asymmetry-relationships with other factors were often compatible with those reported in the ENIGMA meta-analysis <sup>7</sup>.  
506 Concerning sex effects – which were small and differing in direction – we similarly observed leftward SA asymmetry in  
507 temporal and SMG/perisylvian regions to be larger in males <sup>7</sup>, replicating earlier findings <sup>32</sup>. Previous genetic analyses  
508 imply steroid-hormone pathways underly this difference <sup>32</sup>, and sex in general was found to be more predictive than ICV  
509 both here and elsewhere <sup>32</sup>. We also found lower SA asymmetry in medial prefrontal cortex in males that was compatible  
510 with this earlier report <sup>7</sup>. Inconsistencies evident between ours and the ENIGMA report include findings of increased  
511 (here) and decreased <sup>7</sup> lateral parietal SA asymmetry in males, and increased <sup>7</sup> and decreased (here) entorhinal CT  
512 asymmetry in males, and our approach detected other regions slightly more asymmetric in males (e.g. STS). Possibly,  
513 differences in sample median age (here UKB = ~64; Kong et al. = 26 <sup>7</sup>) and potential sex-differences in age decline  
514 trajectories <sup>85</sup> may underlie some inconsistencies, possibly moreso for CT measures in structures vulnerable to age-  
515 related degeneration <sup>24</sup>.

516  
517 Several limitations should be mentioned. First, our delineation of population-level asymmetry used a single analysis  
518 software. As with most current papers, we used FreeSurfer's default 'recon-all' function to delineate the cortex, which  
519 has been extensively validated against postmortem measurements <sup>86</sup> and is the software underlying most large-scale  
520 studies involving brain measures. It is currently unclear to what extent differences in pipelines account for previous mixed  
521 results <sup>7,8,18–20,10–17</sup>. Although we highlight there are clear commonalities between our results and studies using alternative  
522 pipelines <sup>11,12,20</sup>, which may suggest our results generalize across analysis systems <sup>11,12,20,23</sup>, we found one instance  
523 where the MRI pipeline leads to different results for CT asymmetry (Figure 1–figure supplement 6). It is not known what  
524 underlies this difference, though we find it is unrelated to the cross-hemispheric registration methods employed here, as  
525 our results reproduce using standard parcellation methods and thus are likely evident in most FreeSurfer-derived  
526 datasets (Figure 1–figure supplement 5). One possibility could be that thickness asymmetry may not reflect cortical  
527 thickness differences per se, but rather reflect biologically meaningful hemispheric differences in intracortical myelination  
528 levels that are consistently picked up on via FreeSurfer's standard delineation procedure. That the anterior-posterior CT  
529 asymmetry pattern shows a clear developmental trajectory also suggests it is a true biological effect (Figure 3; Figure 3–  
530 figure supplements 1–3). Relatedly, while the reported SA and CT asymmetry patterns and strengths using cross-  
531 hemispheric methods agree with standard analysis (Figure 1–figure supplement 5), it is possible the magnitude of some  
532 specific asymmetries near the boundary of the subcortex may be exaggerated via this approach <sup>24</sup>. Second, while  
533 GAMMs are considered an optimal modelling technique for longitudinal lifespan data and are robust to non-normal age  
534 distributions <sup>87</sup>, relative underrepresentation of the mid-adulthood age-range may drive trajectory inflection points around  
535 this age <sup>10</sup>, suggesting caution is warranted regarding interpreting mid-life inflection points as reflecting real change.  
536 Third, though the differing heritability methods applied enabled replication for SA, twin studies are prone to overestimating  
537 heritability due to unmet assumptions <sup>88</sup>, whereas SNP-based methods may not capture all phenotype-relevant genetic  
538 variance and have their own assumptions <sup>89</sup>. Indeed, we found twin-based estimates were often substantially higher even  
539 where only nominally significant, agreeing with recent calls for caution when interpreting twin-based heritability estimates  
540 <sup>88</sup>. Fourth, we imposed a necessary cluster size limit for overlapping asymmetry effects across samples, and thus more  
541 focal asymmetries may also be informative in relation to the factors tested here <sup>24</sup>. Fifth, as only dichotomous handedness  
542 self-reports are available with UKB, future studies might benefit from incorporating more nuanced handedness  
543 assessments not currently available in data of this size. Relatedly, because UKB cognitive data is not exhaustive (e.g.  
544 fluid IQ ranges from 1–13), we extracted the common variance across core tests to index general cognitive ability. This  
545 approach did not permit testing associations with specific cognitive abilities, which may be highly informative in the  
546 context of asymmetry, particularly in the case of lateralized cognition <sup>90</sup>.

547  
548 Overall, we provide an openly-available comprehensive characterization of asymmetry in the cerebral cortex including  
549 longitudinal lifespan changes, heritability, and individual differences that bears enough reproducibility to be used as a  
550 standard in future research.

## 551 552 553 **4. Methods**

### 554 **4.1 Samples**

555 We used anatomical T1 -weighted ( $T1_w$ ) scans from 7 independent international MRI datasets originating from 4  
556 countries (see [Supplementary file 1A](#) for an overview of samples used for each analysis). Note that with the exception  
557 of vertex-wise analyses in UKB (see below), all analyses made use of all available observations from each sample  
558 meeting the stated criteria for each analysis (e.g. age-range).

#### 559 **4.1.1 Reproducibility across samples**

560 To delineate average adult patterns of whole-cortical SA and CT asymmetry, we restricted the age-range of all samples  
561 used in the vertex-wise analyses to 18–55. **Dataset 1:** Here, the Center for Lifespan Changes in Brain and Cognition  
562 (LCBC) sample comprised 1572 mixed cross-sectional and longitudinal scans (N longitudinal = 812; timepoint range =  
563 1–6) from 923 participants (mean age =  $30.6 \pm 9.6$ ) collected across 2 scanners. Additionally, 125 individuals were double-  
564 scanned at the same timepoint on both scanners. **Dataset 2:** The Cambridge Centre for Ageing and Neuroscience (Cam-  
565 CAN) <sup>91</sup> sample comprised cross-sectional scans of 321 individuals (mean age =  $38.7 \pm 9.7$ ) <sup>92</sup>. **Dataset 3:** The Dallas

567 Lifespan Brain Study (*DLBS*)<sup>93</sup> sample comprised cross-sectional scans of 160 individuals (mean age = 37.5 ± 10.7).  
568 **Dataset 4:** The Southwest University Adult Lifespan Dataset (*SALD*)<sup>94</sup> sample comprised cross-sectional scans of 301  
569 individuals (mean age = 33.7 ± 11.5). **Dataset 5:** The *IXI* sample comprised cross-sectional scans of 313 healthy  
570 individuals collected across 3 scanners (mean age = 36.8 ± 9.6; <http://brain-development.org/ixi-dataset>). **Dataset 6:**  
571 Here, the Human Connectome Project (*HCP*) 1200<sup>95</sup> sample comprised 1111 scans (mean age = 28.8 ± 3.7). **Dataset**  
572 **7:** Here, the UKB sample consisted of 1000 randomly sampled cross-sectional scans (mean age = 52.1 ± 1.9), restricted  
573 to be comparable in size to the other datasets in this analysis.

574  
575 **4.1.2 Lifespan trajectories**  
576 Here, we used the full age-range of LCBC (4.1 - 89.4 years), with a sample comprising 3937 cross-sectional and  
577 longitudinal scans (N longitudinal = 2762) from 1886 individuals (females = 1139; mean age = 36.8) collected across 4  
578 scanners (271 double-scans)<sup>96,97</sup>.

579  
580 **4.1.3 Interregional correlations**  
581 Here, we used the three largest datasets; LCBC (N = 923; N obs = 1572), UKB (N = 38,172), and HCP (N = 1109; two  
582 outliers removed; see 4.3.3).

583  
584 **4.1.4 Heritability and individual differences**  
585 For twin heritability, we used HCP 1200 extended twin data (1037 scans from twins and non-twin siblings; age-range =  
586 22-37; mean age = 28.9 ± 3.7). The various kinships are described in [Supplementary file 1B](#). All included twin pairs were  
587 same-sex. For SNP-heritability, we used the UKB imaging sample with genome-wide data (N = 31,433; see 4.3.4). For  
588 individual differences analyses, we used the UKB imaging sample with the maximum number of available observations  
589 for each variable-of-interest (see 4.3.5).

590  
591 **4.2. MRI preprocessing**  
592 T1w anatomical images (see [Supplementary file 1C](#) for MRI acquisition parameters) were processed with FreeSurfer  
593 (v6.0.0)<sup>98</sup> and vertex-wise SA and CT morphometry estimates were obtained for each MRI observation. As the LCBC  
594 sample also contained longitudinal observations, initial cross-sectional reconstructions in LCBC were subsequently ran  
595 through FreeSurfer's longitudinal pipeline. As HCP data was acquired at a higher voxel resolution (0.7mm isotropic), the  
596 T1w scans were processed with the --hires flag to recon-all<sup>99</sup>. SA and CT maps of the LH and RH of each participant in  
597 each dataset were resampled from the native cortical geometry to a symmetrical surface template ("*LH\_sym*")<sup>14,100</sup> based  
598 on cross-hemispheric registration<sup>101</sup>. This procedure achieves vertex-wise alignment of the data from each participant  
599 and homotopic hemisphere in a common analysis space. SA values were resampled with an additional Jacobian  
600 correction to ensure preservation of the areal quantities<sup>102</sup>. We then applied an 8mm FWHM Gaussian kernel to surface-  
601 smooth the LH and RH data.

602  
603 **4.3 Data analysis**  
604 All analyses were performed in FreeSurfer (v6.0) and R (v4.1.1).

605  
606 **4.3.1 Reproducibility across samples: population-level asymmetry**  
607 We assessed SA and CT asymmetry vertex-wise using FreeSurfer's Linear Mixed Effects (LME) tool<sup>103</sup>. Asymmetry was  
608 delineated via the main effect of Hemisphere (controlling for Age, Age × Hemisphere, Sex, Scanner [where applicable],  
609 with a random subject term). For each sample and metric, we computed mean Asymmetry Index maps (AI; defined as  
610 (LH-RH) / ((LH+RH)/2)). Spatial overlap of AI maps across datasets was quantified using Pearson's *r*. To delineate  
611 regions exhibiting robust SA and CT asymmetry across datasets, we thresholded and binarized the AI maps by a given  
612 absolute effect size (SA = 5%; CT = 1%; achieving  $p[\text{FDR}] < .001$  in most datasets with FreeSurfer's 2-stage FDR-  
613 procedure<sup>103</sup>), and summed the binary maps. After removing the smallest clusters (<200 mm<sup>2</sup>), a set of robust clusters  
614 was defined as those exhibiting overlapping effects in 6 out of 7 samples. We then extracted SA and CT data in  
615 symmetrical space for each cluster, subject, and hemisphere, spatially averaging across vertices.

616  
617 **4.3.2 Lifespan trajectories**  
618 Factor-smooth GAMMs ("*gam4*"<sup>104</sup>) were used to fit a smooth Age trajectory per Hemisphere, and assess the smooth  
619 Age × Hemisphere interaction in our clusters. The linear predictor matrix of the GAMM was used to obtain asymmetry  
620 trajectories and their confidence intervals, computed as the difference between zero-centered (i.e. demeaned)  
621 hemispheric age-trajectories. We included Hemisphere as an additional fixed effect, sex and scanner as covariates-of-  
622 no-interest, and a random subject intercept. A low number of basis dimensions for each smoothing spline was chosen to  
623 guard against overfitting (knots = 6; see [Figure 2—figure supplement 1](#)). Here, outliers falling > 6SD from the trajectory of  
624 either hemisphere were removed on a region-wise basis ([Supplementary file 1E-F](#)).

625  
626 **4.3.3 Interregional correlations**  
627 We assessed covariance between asymmetries, separately for SA and CT. Here, we regressed out age, sex and scanner  
628 (where applicable) from each AI, and obtained a cluster-cluster correlation matrix. Individual AI's in clusters with rightward  
629 mean asymmetry were inverted, such that positive correlations denote asymmetry-asymmetry relationships regardless  
630 of the direction of mean asymmetry in the cluster. At this point, two outliers in HCP data were detected and discarded for  
631 this and all subsequent analyses ([Figure 4—figure supplement 4](#)). Replication was assessed using the Mantel test ("*ade4*"  
632<sup>105</sup>) between each dataset-pair (LCBC, UKB, HCP) across 10,000 permutations. We then post-hoc tested whether  
633 covariance between asymmetries was related to proximity in cortex, obtaining the average geodesic distance between

634 all clusters along the ipsilateral surface (“SurfDist” Python package <sup>106</sup>), and correlating pair-wise distance with pair-wise  
635 correlation coefficient (Fisher’s transformed coefficients; Spearman’s correlation). To post-hoc test whether observed  
636 covariance patterns for CT reflected a global factor, we ran a PCA across z-transformed AIs for all CT clusters (pre-  
637 corrected for the same covariates). Based on the results, we computed the mean AIs across all leftward and across all  
638 rightward clusters and tested the partial correlation between mean leftward CT asymmetry in left-asymmetric clusters  
639 and mean rightward CT asymmetry in right-asymmetric clusters, in each of the three cohorts.

#### 640 641 **4.3.4 Heritability**

642 Heritability of SA and CT asymmetry was assessed using both twin- and SNP-based methods, both for our set of robust  
643 clusters and cortex-wide across 500 parcels <sup>50</sup>. For cluster analyses, significance was considered at Bonferroni-corrected  
644  $p < .05$  applied separately across each metric. Cortex-wide significance was considered at  $p(FDR) < .05$  (500 tests per  
645 map). Twin heritability was assessed using ACE models in “OpenMx” <sup>107</sup>. Using observed cross-twin and cross-sibling  
646 covariance, the ACE model decomposes the proportion of observed phenotypic variance into additive genetic effects [A],  
647 shared environmental effects [C], and unique environmental effects and/or error [E]. Data were reformatted such that  
648 rows represented family-wise observations. As is standard, we set A to be 1 for MZ twins assumed to share 100% of  
649 their segregating genes (but see <sup>108</sup>), 0.5 for DZ twins and siblings that share 50% on average, and shared environment  
650 was assumed equal for twins and non-twin siblings (but see <sup>88,109</sup>). For each phenotype we first regressed out age and  
651 sex and computed z-scores. Statistical significance was assessed by comparing ACE model fit to submodels with the  
652 parameter-of-interest removed.

653 For SNP-heritability, the final genetic sample consisted of 31,433 UKB participants (application #32048) with imaging  
654 and quality checked genetic data. We removed subjects that were outliers based on heterozygosity [field 22027] and  
655 missingness ( $> 0.05$ ), mismatched genetic and reported sex [22001], sex chromosome aneuploidies [22019], and those  
656 not in the “white British ancestry” subset [22006] <sup>110</sup>. At variant level, after removing SNPs with minor allele frequency  $<$   
657 0.01, data from 654,584 autosomal SNPs were used to compute a genetic relationship matrix using GCTA (v1.93.2) <sup>111</sup>.  
658 For each phenotype, we first regressed out age and sex and computed z-scores. Genome-based restricted maximum  
659 likelihood (GREML) methods as implemented in GCTA were then used to compute SNP-heritability for each AI measure,  
660 applying a kinship coefficient cut-off of 0.025 (excluding one individual from each pair), and controlling for genetic  
661 population structure (first ten principal components). Bivariate GREML analysis was used to test genetic correlations  
662 between asymmetry clusters <sup>111</sup>, with relationships tested only for cluster-pairs where both clusters exhibited significant  
663 SNP-heritability ( $p < .05$ ; pre-corrected; 78 tests for SA, 48 for CT). Significance of genetic correlations was assessed at  
664  $p(FDR) < .05$ .

#### 665 666 667 **4.3.5 Associations with Cognition, Sex, Handedness, & ICV**

668 Finally, we assessed relationships between asymmetry in our robust clusters and cognitive ability, handedness, sex and  
669 ICV. For cognition, we used the first principal component across the following 11 core UK Biobank cognitive variables  
670 <sup>112</sup>: Mean reaction time (log transformed) [field 20023], Numeric memory [4282], Fluid reasoning [20016], Matrix  
671 completion [6373], Tower rearranging [21004], Symbol digit substitution [23324], Paired associate learning [20197],  
672 Prospective memory [20018], Pairs matching (log) [399], Trail making A (log) [6348], Trail making B (log) [6350]. Prior to  
673 the PCA, for participants with cognitive data, data was imputed for missing cognitive variables via the “imputePCA” R  
674 function (number of estimated components tentatively optimized using general cross validation; “missMDA” Package <sup>113</sup>).  
675 PC1 (explaining 39.2%; Supplementary file 1L) was inverted to correlate negatively with age ( $r = -.39$ ), ensuring higher  
676 values reflected higher cognition. As fewer participants had cognitive data relative to the other variables, for each cluster  
677 we ran one set of linear models to assess the marginal effect of cognition (PC1 as predictor; age, sex, ICV controlled;  $N$   
678 = 35,199), and one set of linear models to assess the marginal effects of Handedness, Sex, and ICV in a model including  
679 all three predictors (age controlled,  $N = 37,570$  with available handedness data). For the cognitive analysis, effects  
680 identified in the imputed dataset were checked against the confidence intervals for the effect in the subset of the data  
681 with no missing cognitive variables ( $N = 4696$ ). Participants who self-reported as mixed handed were not included as this  
682 can be unreliable over repeat time-points <sup>24</sup>. Significance was considered at Bonferroni-corrected  $\alpha = p < 7.3^{-5}$  (.01/136  
683 [34 clusters  $\times$  4]).

#### 684 685 686 **Data sharing/availability**

687 All summary-level maps are available at neurovault.org/XXXX (upon acceptance). All code underlying the main  
688 analyses is available at <https://github.com/jamesmroe/PopAsym> and on the Open Science Framework (upon  
689 acceptance). All derived source data underlying all figures is also available here and in Supplementary files 2-3. All  
690 datasets used in this work are openly available, with the exception of LCBC, where participants, which include many  
691 children, have not consented to share their data publicly online. Other datasets used in this work are available without  
692 restrictions and are not subject to application approval (DLBS; [https://fcon\\_1000.projects.nitrc.org/indi/retro/dlbs.html](https://fcon_1000.projects.nitrc.org/indi/retro/dlbs.html);  
693 CC BY-NC; SALD; [http://fcon\\_1000.projects.nitrc.org/indi/retro/sald.html](http://fcon_1000.projects.nitrc.org/indi/retro/sald.html); CC BY-NC; IXI; [https://brain-  
694 development.org/ixi-dataset](https://brain-development.org/ixi-dataset); CC BY-SA 3.0). Accordingly, we have made the individual-level data for these samples  
695 available and our code can be used to reproduce vertex-wise analyses in these samples. Individual-level data for the  
696 remaining samples (LCBC; Cam-CAN, HCP; UKB) may be available upon reasonable request, given appropriate  
697 ethical, data protection, and data-sharing agreements where applicable. Requests must be submitted and approved via  
698 the relevant channel (details are provided in Supplementary File 2).

#### 699 700 **Acknowledgements**

701 Scripts were ran on the Colossus processing cluster at the University of Oslo, and on resources provided by UNINETT  
702 Sigma2 (NN9769K). LCBC funding: European Research Council under grants 283634, 725025 (to A.M.F.), and 313440  
703 (to K.B.W.); Norwegian Research Council (to A.M.F. and K.B.W.) under grants 249931 (TOPPFORSK) and 302854  
704 (FRIPRO; to Y.W.), The National Association for Public Health's dementia research program, Norway (to A.M.F). Data  
705 used in the preparation of this work were obtained from the MGH-USC Human Connectome Project  
706 (<https://ida.loni.usc.edu/login.jsp>). Data used in this work was also provided by the Cambridge Centre for Ageing and  
707 Neuroscience (CamCAN). This research has been conducted using the UK Biobank Resource.  
708  
709

## 710 4.9 References

- 711 1. van Kesteren, E.-J. & Kievit, R. A. Exploratory factor analysis with structured residuals for brain network data. *Netw.*  
712 *Neurosci.* 1–45 (2020). doi:10.1162/netn\_a\_00162
- 713 2. Stark, D. E. *et al.* Regional Variation in Interhemispheric Coordination of Intrinsic Hemodynamic Fluctuations. *J.*  
714 *Neurosci.* **28**, 13754–13764 (2008).
- 715 3. Schmitt, J. E., Giedd, J. N., Raznahan, A. & Neale, M. C. The genetic contributions to maturational coupling in the  
716 human cerebrum: A longitudinal pediatric twin imaging study. *Cereb. Cortex* **28**, 3184–3191 (2018).
- 717 4. Chen, C. H. *et al.* Genetic topography of brain morphology. *Proc. Natl. Acad. Sci. U. S. A.* **110**, 17089–17094 (2013).
- 718 5. Eyler, L. T. *et al.* Conceptual and Data-based Investigation of Genetic Influences and Brain Asymmetry: A Twin Study  
719 of Multiple Structural Phenotypes. *J. Cogn. Neurosci.* **26**, 1100–1117 (2014).
- 720 6. Raznahan, A. *et al.* Patterns of coordinated anatomical change in human cortical development: A longitudinal  
721 neuroimaging study of maturational coupling. *Neuron* **72**, 873–884 (2011).
- 722 7. Kong, X.-Z. *et al.* Mapping cortical brain asymmetry in 17,141 healthy individuals worldwide via the ENIGMA  
723 Consortium. *Proc. Natl. Acad. Sci.* **115**, E5154–E5163 (2018).
- 724 8. Chiarello, C., Vazquez, D., Felton, A. & McDowell, A. Structural asymmetry of the human cerebral cortex: Regional and  
725 between-subject variability of surface area, cortical thickness, and local gyrification. *Neuropsychologia* **93**, 365–379  
726 (2016).
- 727 9. Meyer, M., Liem, F., Hirsiger, S., Jäncke, L. & Hänggi, J. Cortical surface area and cortical thickness demonstrate  
728 differential structural asymmetry in auditory-related areas of the human cortex. *Cereb. Cortex* **24**, 2541–2552 (2014).
- 729 10. Roe, J. M. *et al.* Asymmetric thinning of the cerebral cortex across the adult lifespan is accelerated in Alzheimer's  
730 disease. *Nat. Commun.* **12**, 1–11 (2021).
- 731 11. Li, G., Lin, W., Gilmore, J. H. & Shen, D. Spatial patterns, longitudinal development, and hemispheric asymmetries of  
732 cortical thickness in infants from birth to 2 years of age. *J. Neurosci.* **35**, 9150–9162 (2015).
- 733 12. Luders, E. *et al.* Hemispheric asymmetries in cortical thickness. *Cereb. Cortex* **16**, 1232–1238 (2006).
- 734 13. Zhou, D., Lebel, C., Evans, A. & Beaulieu, C. Cortical thickness asymmetry from childhood to older adulthood.  
735 *Neuroimage* **83**, 66–74 (2013).
- 736 14. Maingault, S., Tzourio-Mazoyer, N., Mazoyer, B. & Crivello, F. Regional correlations between cortical thickness and  
737 surface area asymmetries: A surface-based morphometry study of 250 adults. *Neuropsychologia* **93**, 350–364 (2015).
- 738 15. Shaw, P., Lalonde, F. & Al, L. C. *et.* Development of Cortical Asymmetry in Typically Developing Children and Its  
739 Disruption in Attention-Deficit/Hyperactivity Disorder. **66**, 888–896 (2009).
- 740 16. Lou, Y. *et al.* Brain asymmetry differences between Chinese and Caucasian populations : a surface-based  
741 morphometric comparison study. (2019).
- 742 17. Hamilton, L. S. *et al.* Asymmetries of cortical thickness: Effects of handedness, sex, and schizophrenia. *Neuroreport*  
743 **18**, 1427–1431 (2007).
- 744 18. Zhou, D. *et al.* Preserved cortical asymmetry despite thinner cortex in children and adolescents with prenatal alcohol  
745 exposure and associated conditions. *Hum. Brain Mapp.* **39**, 72–88 (2018).
- 746 19. Koelkebeck, K. *et al.* The contribution of cortical thickness and surface area to gray matter asymmetries in the healthy  
747 human brain. *Hum. Brain Mapp.* **35**, 6011–6022 (2014).
- 748 20. Plessen, K. J., Hugdahl, K., Bansal, R., Hao, X. & Peterson, B. S. Sex, age, and cognitive correlates of asymmetries in  
749 thickness of the cortical mantle across the life span. *J Neurosci* **34**, 6294–6302 (2014).
- 750 21. Postema, M. C. *et al.* Altered structural brain asymmetry in autism spectrum disorder in a study of 54 datasets. *Nat.*  
751 *Commun.* **10**, 1–12 (2019).
- 752 22. Thompson, P. M. *et al.* Tracking Alzheimer's disease. *Ann. N. Y. Acad. Sci.* **1097**, 183–214 (2007).
- 753 23. Lyttelton, O. C. *et al.* Positional and surface area asymmetry of the human cerebral cortex. *Neuroimage* **46**, 895–903  
754 (2009).
- 755 24. Sha, Z. *et al.* Handedness and its genetic influences are associated with structural asymmetries of the cerebral cortex  
756 in 31,864 individuals. *Proc. Natl. Acad. Sci.* **118**, 1–9 (2021).
- 757 25. Toga, a W. & Thompson, P. M. Mapping brain asymmetry. *Nat. Rev. Neurosci.* **4**, 37–48 (2003).
- 758 26. Li, G. *et al.* Mapping longitudinal hemispheric structural asymmetries of the human cerebral cortex from birth to 2 years  
759 of age. *Cereb. Cortex* **24**, 1289–1300 (2014).
- 760 27. Bain, J. S., Filo, S. & Mezer, A. A. The robust and independent nature of structural STS asymmetries. *Brain Struct.*  
761 *Funct.* **224**, 3171–3182 (2019).
- 762 28. Remer, J. *et al.* Quantifying cortical development in typically developing toddlers and young children, 1–6 years of age.  
763 *Neuroimage* **153**, 246–261 (2017).
- 764 29. Nie, J., Li, G. & Shen, D. Development of cortical anatomical properties from early childhood to early adulthood.  
765 *Neuroimage* **76**, 216–224 (2013).
- 766 30. Li, G. *et al.* Mapping region-specific longitudinal cortical surface expansion from birth to 2 years of age. *Cereb. Cortex*  
767 **23**, 2724–2733 (2013).
- 768 31. Sha, Z. *et al.* The genetic architecture of structural left–right asymmetry of the human brain. *Nat. Hum. Behav.* (2021).  
769 doi:10.1038/s41562-021-01069-w
- 770 32. Guadalupe, T. *et al.* Asymmetry within and around the human planum temporale is sexually dimorphic and influenced  
771 by genes involved in steroid hormone receptor activity. *Cortex* **62**, 41–55 (2015).
- 772 33. Chiarello, C., Vazquez, D., Felton, A. & Leonard, C. M. Structural asymmetry of anterior insula: Behavioral correlates  
773 and individual differences. *Brain Lang.* **126**, 109–122 (2013).
- 774



- 775 34. Rentería, M. E. Cerebral asymmetry: A quantitative, multifactorial, and plastic brain phenotype. *Twin Res. Hum. Genet.* **15**, 401–413 (2012).
- 776
- 777 35. Francks, C. Exploring human brain lateralization with molecular genetics and genomics. *Ann. N. Y. Acad. Sci.* **1359**, 1–13 (2015).
- 778
- 779 36. Liu, H., Stufflebeam, S. M., Sepulcre, J., Hedden, T. & Buckner, R. L. Evidence from intrinsic activity that asymmetry of the human brain is controlled by multiple factors. *Proc. Natl. Acad. Sci. U. S. A.* **106**, 20499–20503 (2009).
- 780
- 781 37. Crow, T. J., Crow, L. R., Done, D. J. & Leask, S. Relative hand skill predicts academic ability: Global deficits at the point of hemispheric indecision. *Neuropsychologia* **36**, 1275–1282 (1998).
- 782
- 783 38. Ocklenburg, S., Güntürkün, O., Hugdahl, K. & Hirnstein, M. Laterality and mental disorders in the postgenomic age – A closer look at schizophrenia and language lateralization. *Neurosci. Biobehav. Rev.* **59**, 100–110 (2015).
- 784
- 785 39. Kong, X.-Z. *et al.* Large-Scale Phenomic and Genomic Analysis of Brain Asymmetrical Skew. *Cereb. Cortex* 1–18 (2021). doi:10.1093/cercor/bhab075
- 786
- 787 40. LeMay, M. Morphological Cerebral Asymmetries of Modern Man, Fossil Man, and Nonhuman Primate. *Ann. N. Y. Acad. Sci.* **280**, 349–366 (1976).
- 788
- 789 41. Zhao, L., Matloff, W., Shi, Y., Cabeen, R. P. & Toga, A. W. Mapping Complex Brain Torque Components and Their Genetic and Phenomic Architecture in 24 , 112 healthy individuals. (2021).
- 790
- 791 42. Moodie, J. E. *et al.* Fluctuating asymmetry in brain structure and general intelligence in 73-year-olds. *Intelligence* **78**, 101407 (2020).
- 792
- 793 43. Yeo, R. A., Ryman, S. G., Pommy, J., Thoma, R. J. & Jung, R. E. General cognitive ability and fluctuating asymmetry of brain surface area. *Intelligence* **56**, 93–98 (2016).
- 794
- 795 44. Kong, X. *et al.* Mapping brain asymmetry in health and disease through the ENIGMA consortium. *Hum. Brain Mapp.* 1–15 (2020).
- 796
- 797 45. Wiberg, A. *et al.* Handedness , language areas and neuropsychiatric diseases : insights from brain imaging and genetics. *Brain* 1–10 (2019). doi:10.1093/brain/awz257
- 798
- 799 46. van der Meer, D. *et al.* Quantifying the Polygenic Architecture of the Human Cerebral Cortex: Extensive Genetic Overlap between Cortical Thickness and Surface Area. *Cereb. Cortex* **30**, 5597–5603 (2020).
- 800
- 801 47. Eyer, L. T. *et al.* A comparison of heritability maps of cortical surface area and thickness and the influence of adjustment for whole brain measures: A magnetic resonance imaging twin study. *Twin Res. Hum. Genet.* **15**, 304–314 (2012).
- 802
- 803 48. Desikan, R. S. *et al.* An automated labeling system for subdividing the human cerebral cortex on MRI scans into gyral based regions of interest. *Neuroimage* **31**, 968–80 (2006).
- 804
- 805 49. Miller, K. L. *et al.* Multimodal population brain imaging in the UK Biobank prospective epidemiological study. *Nat. Neurosci.* **19**, 1523–1536 (2016).
- 806
- 807 50. Schaefer, A. *et al.* Local-Global Parcellation of the Human Cerebral Cortex from Intrinsic Functional Connectivity MRI. *Cereb. Cortex* 1–20 (2017). doi:10.1093/cercor/bhx179
- 808
- 809 51. Habas, P. A. *et al.* Early folding patterns and asymmetries of the normal human brain detected from in utero MRI. *Cereb. Cortex* **22**, 13–25 (2012).
- 810
- 811 52. Glasel, H. *et al.* A robust cerebral asymmetry in the infant brain: The rightward superior temporal sulcus. *Neuroimage* **58**, 716–723 (2011).
- 812
- 813 53. Foundas, A. L., Eure, K. F., Luevano, L. F. & Weinberger, D. R. MRI asymmetries of Broca's area: The pars triangularis and pars opercularis. *Brain Lang.* **64**, 282–296 (1998).
- 814
- 815 54. Penfield, W. & Boldrey, E. Somatic Motor and Sensory Representation in Man. *Brain* 389–443 (1937).
- 816
- 817 55. Roux, F. E., Djidjeli, I. & Durand, J. B. Functional architecture of the somatosensory homunculus detected by electrostimulation. *J. Physiol.* **596**, 941–956 (2018).
- 818
- 819 56. Walhovd, K. B. *et al.* Neurodevelopmental origins of lifespan changes in brain and cognition. *Proc. Natl. Acad. Sci. U. S. A.* **113**, 9357–9362 (2016).
- 820
- 821 57. Grasby, K. L. *et al.* The genetic architecture of the human cerebral cortex. *Science (80-. )*. **367**, (2020).
- 822
- 823 58. Fjell, A. M. *et al.* Continuity and Discontinuity in Human Cortical Development and Change From Embryonic Stages to Old Age. *Cereb. Cortex* **29**, 3879–3890 (2019).
- 824
- 825 59. Wierenga, L. M., Langen, M., Oranje, B. & Durston, S. Unique developmental trajectories of cortical thickness and surface area. *Neuroimage* **87**, 120–126 (2014).
- 826
- 827 60. Rakic, P. A small step for the cell, a giant leap for mankind: a hypothesis of neocortical expansion during evolution. *Trends Neurosci.* **18**, 383–388 (1995).
- 828
- 829 61. Chance, S. A., Casanova, M. F., Switala, A. E. & Crow, T. J. Minicolumnar structure in Heschl's gyrus and planum temporale: Asymmetries in relation to sex and callosal fiber number. *Neuroscience* **143**, 1041–1050 (2006).
- 830
- 831 62. Tzourio-Mazoyer, N., Crivello, F. & Mazoyer, B. Is the planum temporale surface area a marker of hemispheric or regional language lateralization? *Brain Struct. Funct.* **223**, 1217–1228 (2018).
- 832
- 833 63. Ocklenburg, S. *et al.* Neurite architecture of the planum temporale predicts neurophysiological processing of auditory speech. *Sci. Adv.* **4**, 1–9 (2018).
- 834
- 835 64. Natu, V. S. *et al.* Apparent thinning of human visual cortex during childhood is associated with myelination. *Proc. Natl. Acad. Sci.* **116**, 20750–20759 (2019).
- 836
- 837 65. Petanjek, Z. *et al.* Extraordinary neoteny of synaptic spines in the human prefrontal cortex. *Proc. Natl. Acad. Sci. U. S. A.* **108**, 13281–13286 (2011).
- 838
- 839 66. Faust, T. E., Gunner, G. & Schafer, D. P. Mechanisms governing activity-dependent synaptic pruning in the developing mammalian CNS. *Nat. Rev. Neurosci.* **22**, 657–673 (2021).
- 840
- 841 67. Cuellar-Partida, G. *et al.* Genome-wide association study identifies 48 common genetic variants associated with handedness. *Nat. Hum. Behav.* (2020). doi:10.1038/s41562-020-00956-y
- 842
- 843 68. Carrion-Castillo, A. *et al.* Genetic effects on planum temporale asymmetry and their limited relevance to neurodevelopmental disorders, intelligence or educational attainment. *Cortex* **124**, 137–153 (2020).
- 844
- 845 69. Dubois, J. *et al.* Structural asymmetries of perisylvian regions in the preterm newborn. *Neuroimage* **52**, 32–42 (2010).
- 846
- 847 70. Kaspran, G. *et al.* The prenatal origin of hemispheric asymmetry: An in utero neuroimaging study. *Cereb. Cortex* **21**, 1076–1083 (2011).
- 848
- 849 71. Hill, J. *et al.* A Surface-Based Analysis of Hemispheric Asymmetries and Folding of Cerebral Cortex in Term-Born Human Infants. *J. Neurosci.* **30**, 2268–2276 (2010).
- 850 72. Bishop, D. V. M. & Bates, T. C. Heritability of language laterality assessed by functional transcranial Doppler ultrasound: A twin study. *Wellcome Open Res.* **4**, 1–52 (2020).

- 851 73. Somers, M. *et al.* Linkage analysis in a Dutch population isolate shows no major gene for left-handedness or atypical  
852 language lateralization. *J. Neurosci.* **35**, 8730–8736 (2015).
- 853 74. Kong, X.-Z. *et al.* Handedness and Other Variables Associated with Human Brain Asymmetrical Skew. *bioRxiv* 756395  
854 (2019). doi:10.1101/756395
- 855 75. Karama, S. *et al.* Childhood cognitive ability accounts for associations between cognitive ability and brain cortical  
856 thickness in old age. *Mol. Psychiatry* **19**, 555–559 (2014).
- 857 76. Deary, I. J., Whiteman, M. C., Starr, J. M., Whalley, L. J. & Fox, H. C. The Impact of Childhood Intelligence on Later  
858 Life: Following Up the Scottish Mental Surveys of 1932 and 1947. *J. Pers. Soc. Psychol.* **86**, 130–147 (2004).
- 859 77. Labache, L. *et al.* A SENTence Supramodal Areas Atlas (SENSAAS) based on multiple task-induced activation  
860 mapping and graph analysis of intrinsic connectivity in 144 healthy right-handers. *Brain Struct. Funct.* **224**, 859–882  
861 (2019).
- 862 78. Bidula, S. P. & Króliczak, G. Structural asymmetry of the insula is linked to the lateralization of gesture and language.  
863 *Eur. J. Neurosci.* **41**, 1438–1447 (2015).
- 864 79. Keller, S. S. *et al.* Can the language-dominant hemisphere be predicted by brain anatomy? *J. Cogn. Neurosci.* **23**,  
865 2013–2029 (2011).
- 866 80. Mazoyer, B. *et al.* Gaussian mixture modeling of hemispheric lateralization for language in a large sample of healthy  
867 individuals balanced for handedness. *PLoS One* **9**, 9–14 (2014).
- 868 81. Knecht, S. *et al.* Handedness and hemispheric language dominance in healthy humans. *Brain* **123**, 2512–2518 (2000).
- 869 82. Afif, A., Bouvier, R., Buenerd, A., Trouillas, J. & Mertens, P. Development of the human fetal insular cortex: Study of  
870 the gyration from 13 to 28 gestational weeks. *Brain Struct. Funct.* **212**, 335–346 (2007).
- 871 83. Kalani, M. Y. S., Kalani, M. A., Gwinn, R., Keogh, B. & Tse, V. C. K. Embryological development of the human insula  
872 and its implications for the spread and resection of insular gliomas. *Neurosurg. Focus* **27**, 1–4 (2009).
- 873 84. Saadon-Grosman, N., Loewenstein, Y. & Arzy, S. The ‘creatures’ of the human cortical somatosensory system. *Brain*  
874 *Commun.* **2**, 1–10 (2020).
- 875 85. McCarrey, A. C., An, Y., Kitner-Triolo, M. H., Ferrucci, L. & Resnick, S. M. Sex differences in cognitive trajectories in  
876 clinically normal older adults. *Psychol. Aging* **31**, 166–175 (2016).
- 877 86. Cardinale, F. *et al.* Validation of FreeSurfer-Estimated Brain Cortical Thickness: Comparison with Histologic  
878 Measurements. *Neuroinformatics* **12**, 535–542 (2014).
- 879 87. Sørensen, Ø., Walhovd, K. B. & Fjell, A. M. A Recipe for Accurate Estimation of Lifespan Brain Trajectories,  
880 Distinguishing Longitudinal and Cohort Effects. (2020).
- 881 88. Dalmaijer, E. S. Twin studies with unmet assumptions are biased towards genetic heritability. *bioRxiv*  
882 2020.08.27.270801 (2020).
- 883 89. Hibar, D. P. *et al.* Novel genetic loci associated with hippocampal volume. *Nat. Commun.* **8**, (2017).
- 884 90. Ocklenburg, S., Hirnstein, M., Beste, C. & Güntürkün, O. Lateralization and cognitive systems. *Washington, DC APA,*  
885 *Guidel. Dev. Panel Treat. Posttraumatic Stress Disord. Adults.* **5**, (2014).
- 886 91. Shafto, M. A. *et al.* The Cambridge Centre for Ageing and Neuroscience (Cam-CAN) study protocol: A cross-sectional,  
887 lifespan, multidisciplinary examination of healthy cognitive ageing. *BMC Neurol.* **14**, 1–25 (2014).
- 888 92. Taylor, J. R. *et al.* The Cambridge Centre for Ageing and Neuroscience (Cam-CAN) data repository: Structural and  
889 functional MRI, MEG, and cognitive data from a cross-sectional adult lifespan sample. *Neuroimage* **144**, 262–269  
890 (2017).
- 891 93. Kennedy, K. M. *et al.* Effects of beta-amyloid accumulation on neural function during encoding across the adult  
892 lifespan. *Neuroimage* **62**, 1–8 (2012).
- 893 94. Wei, D. *et al.* Data Descriptor: Structural and functional brain scans from the cross-sectional Southwest University adult  
894 lifespan dataset. *Sci. Data* **5**, 1–10 (2018).
- 895 95. Van Essen, D. C. *et al.* The WU-Minn Human Connectome Project: An overview. *Neuroimage* **80**, 62–79 (2013).
- 896 96. Fjell, A. M. *et al.* Self-reported sleep relates to hippocampal atrophy across the adult lifespan - results from the  
897 Lifebrain consortium. *Sleep* **1–15** (2019). doi:10.1093/sleep/zsz280
- 898 97. Vidal-Pineiro, D. *et al.* Cellular correlates of cortical thinning throughout the lifespan. Preprint at  
899 <https://www.biorxiv.org/content/10.1101/585786v3>. (2019).
- 900 98. Fischl, B. & Dale, A. M. Measuring the thickness of the human cerebral cortex from magnetic resonance images. *Proc.*  
901 *Natl. Acad. Sci. U. S. A.* **97**, 11050–5 (2000).
- 902 99. Zaretskaya, N., Fischl, B., Reuter, M., Renvall, V. & Polimeni, J. R. Advantages of cortical surface reconstruction using  
903 submillimeter 7 T MEMPRAGE. *Neuroimage* **165**, 11–26 (2018).
- 904 100. Marie, D., Maingault, S., Crivello, F., Mazoyer, B. & Tzourio-Mazoyer, N. Surface-Based Morphometry of Cortical  
905 Thickness and Surface Area Associated with Heschl’s Gyri Duplications in 430 Healthy Volunteers. *Front. Hum.*  
906 *Neurosci.* **10**, (2016).
- 907 101. Greve, D. *et al.* A Surface-based Analysis of Language Lateralization and Cortical Asymmetry. *J. Cogn. Neurosci.* **25**,  
908 1477–1492 (2013).
- 909 102. Winkler, A. M. *et al.* Measuring and comparing brain cortical surface area and other areal quantities. *Neuroimage* **61**,  
910 1428–1443 (2012).
- 911 103. Bernal-Rusiel, J. L., Reuter, M., Greve, D. N., Fischl, B. & Sabuncu, M. R. Spatiotemporal linear mixed effects  
912 modeling for the mass-univariate analysis of longitudinal neuroimage data. *Neuroimage* **81**, 358–370 (2013).
- 913 104. Wood, S. & Scheipl, F. gamm4: Generalized Additive Mixed Models using ‘mgcv’ and ‘lme4’. R package version 0.2-5,  
914 available at <https://cran.r-project.org/web/packages/gamm4/gamm4.pdf>. (2017).
- 915 105. Dray, S. & Dufour, A. B. The ade4 package: Implementing the duality diagram for ecologists. *J. Stat. Softw.* **22**, 1–20  
916 (2007).
- 917 106. Margulies, D. S., Falkiewicz, M. & Huntenburg, J. M. A cortical surface-based geodesic distance package for Python.  
918 *Gigascience* **5**, 1–26 (2016).
- 919 107. Neale, M. C. *et al.* OpenMx 2.0: Extended Structural Equation and Statistical Modeling. *Psychometrika* **81**, 535–549  
920 (2016).
- 921 108. Jonsson, H. *et al.* Differences between germline genomes of monozygotic twins. *Nat. Genet.* **53**, 27–34 (2021).
- 922 109. Mayhew, A. J. & Meyre, D. Assessing the Heritability of Complex Traits in Humans: Methodological Challenges and  
923 Opportunities. *Curr. Genomics* **18**, 332–340 (2017).
- 924 110. Bycroft, C. *et al.* The UK Biobank resource with deep phenotyping and genomic data. *Nature* **562**, 203–209 (2018).
- 925 111. Yang, J. *et al.* Common SNPs explain a large proportion of the heritability for human height. *Nat. Genet.* **42**, 565–569  
926 (2010).

927 112. Fawns-Ritchie, C. & Deary, I. J. Reliability and validity of the UK Biobank cognitive tests. *PLoS One* **15**, 1–24 (2020).  
 928 113. Josse, J. & Husson, F. missMDA: A package for handling missing values in multivariate data analysis. *J. Stat. Softw.*  
 929 **70**, (2016).  
 930  
 931  
 932

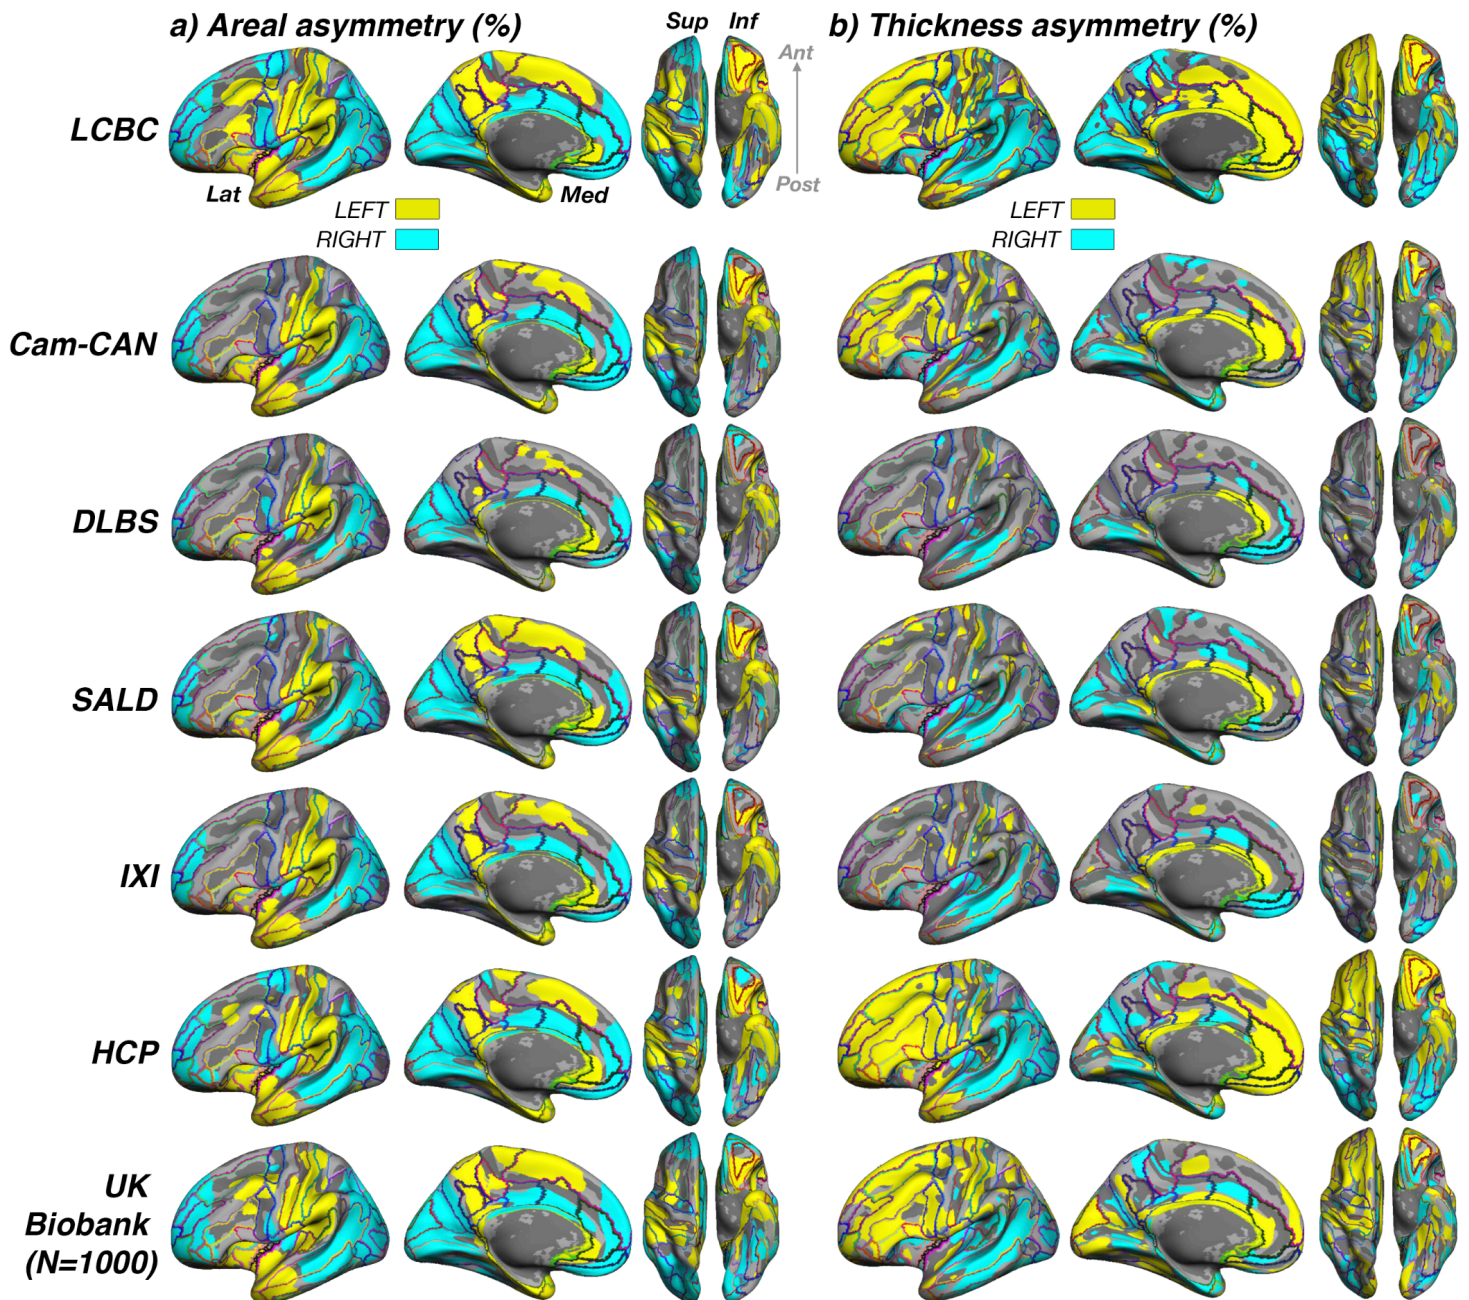

933 **Figure 1–figure supplement 1**

934 **Significance of asymmetry effects across samples**

935 **A) Significance for A) SA and B) CT asymmetry across all samples.** Note that because differences in sample size and  
 936 test power affect the overall level of significance and consequently the FDR-correction, the visualization threshold is set  
 937 to match the FDR-corrected significance level for each cortical metric in the first sample (LCBC;  $p < .001$ ). Warm and  
 938 cold colours depict significance of leftward and rightward asymmetry, respectively. To permit more fine grained  
 939 interpretation of anatomical correspondence, an outline of the Destrieux<sup>1</sup> cortical atlas is overlain. Compare with effect  
 940 sizes in Fig. 1 and 2 in main paper.

941

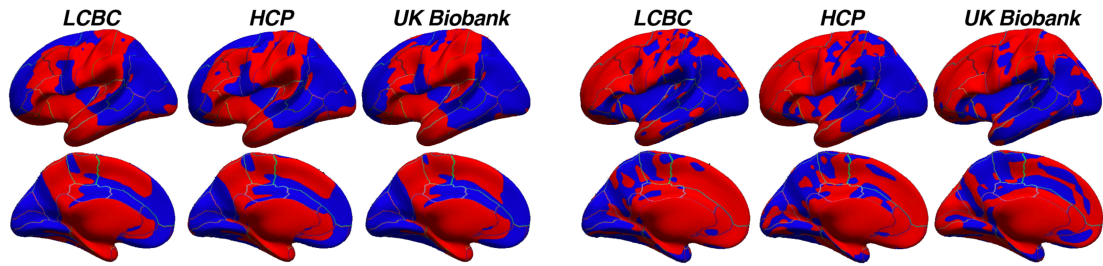

942  
 943 **Figure 1–figure supplement 2**  
 944 **Unthresholded maps**  
 945 Completely unthresholded significance maps of SA (leftmost 3 columns) and CT (rightmost 3 columns) asymmetry  
 946 “effects” for the three largest samples. Desikan-Killiany atlas is overlain.  
 947

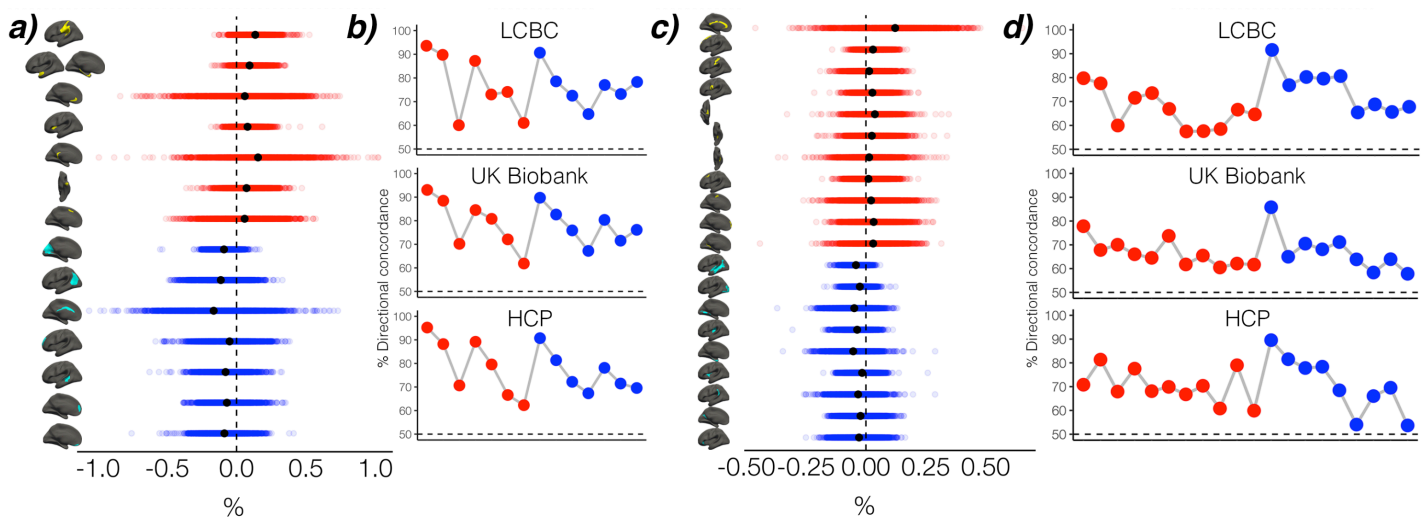

948 **Figure 1–figure supplement 3**  
 949 **Variances of asymmetries**  
 950 Raw distribution of asymmetry (AI's) within population-level **A)** SA and **C)** CT asymmetries in adults (mean AI in black),  
 951 and the proportion of observations with the expected directionality for **B)** SA and **D)** CT clusters. B and D are ordered  
 952 as in A and C. Raw distributions are shown for the LCBC (18-55 years) dataset. % on the x-axis denotes the AI of the  
 953 average CT and SA of a vertex within the cluster.  
 954

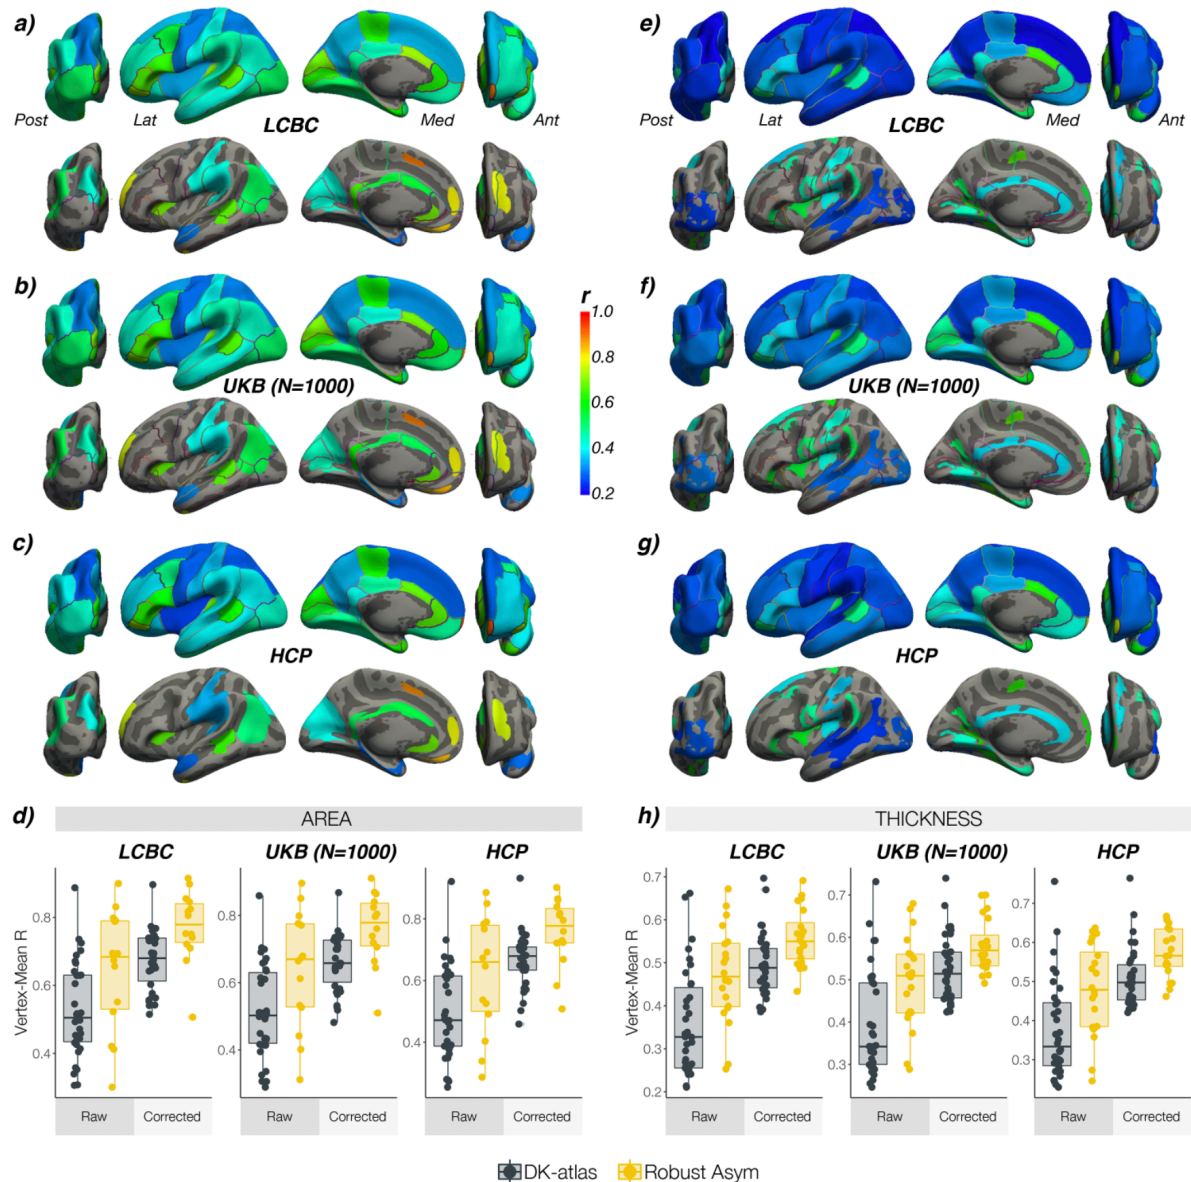

955  
 956  
 957 **Figure 1—figure supplement 4**  
 958 **Comparison of vertex-wise and atlas-based asymmetry estimates**  
 959 To assess to what extent vertex-wise SA and CT asymmetry estimates adhere to the anatomical boundaries of the Desikan-  
 960 Killiany (DK) atlas, we derived AI maps per subject and extracted a vertex  $\times$  subject matrix. Then, within each of the 34 DK  
 961 parcels we correlated the AI at each vertex with the parcel mean (i.e. the mean asymmetry across parcel vertices) and  
 962 computed the mean correlation for each parcel. High correlations would be expected where atlas-derived parcels fit well to  
 963 the underlying vertex-wise structure of cortical asymmetry. We then repeated this analysis using our set of robust  
 964 asymmetry clusters. As a formal test, for each cortical metric the resulting coefficients were used as response variable in  
 965 linear regressions with Cluster Type (DK parcels vs. Robust clusters) as predictor, controlling for cluster size (nVertices)  
 966 and the Cluster Type  $\times$  nVertices interaction. For SA asymmetry, the average vertex-mean correlations across all Desikan-  
 967 Killiany (DK) parcels were  $r = .53 \pm .14$  [LCBC],  $r = .51 \pm .14$  [UK Biobank], and  $r = .49 \pm .15$ , which respectively increased  
 968 to  $r = .65 \pm .18$ ,  $r = .64 \pm .18$ , and  $r = .62 \pm .19$  for SA asymmetry clusters. For CT, the average vertex-mean correlations  
 969 across all DK parcels were  $r = .36 \pm .12$  [LCBC],  $r = .39 \pm .12$  [UK Biobank] and  $r = .38 \pm .12$ , which respectively increased  
 970 to  $r = .47 \pm .11$ ,  $r = .50 \pm .11$  and  $r = .48 \pm .12$ . As would be expected, within parcel/cluster vertex-mean correlations were  
 971 significantly lower in larger parcels/clusters. Linear regressions (size controlled) revealed a significant main effect of Cluster  
 972 Type in all but one association test (see SI Table 5), confirming the visual impression that DK parcels conform poorly to the  
 973 underlying asymmetry of cortex. **A-C)** Average correlation between vertex-wise estimates of SA asymmetry within DK  
 974 parcels to the mean across each parcel (top rows) and between vertex-wise estimates of SA asymmetry within robust  
 975 clusters to the mean across each cluster (bottom rows) within each dataset. **D)** Vertex-mean correlation coefficients for SA  
 976 asymmetry in DK parcels and robust asymmetry clusters, shown as raw values and after correcting for number of vertices  
 977 in the parcel/cluster. Comparable analyses for CT asymmetry are shown in **D-H)**. The complete set of raw vertex-mean

978 correlation coefficients correlated highly between all dataset-pairs for both SA (min  $r = 0.97$ ) and CT (min  $r = 0.95$ )  
 979 Post=posterior; Lat=lateral; Med=medial; Ant=anterior.  
 980  
 981

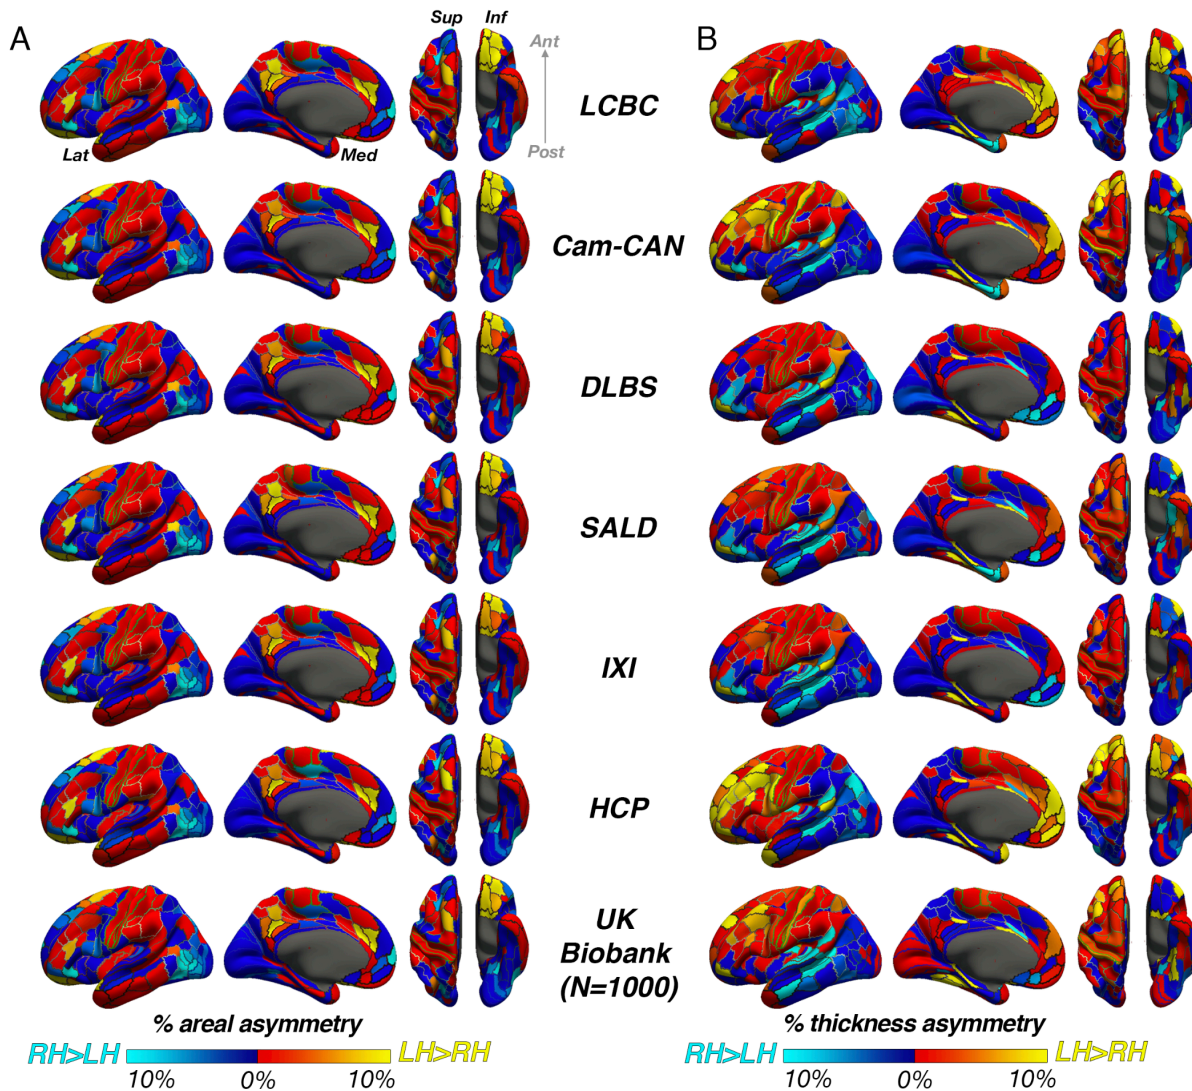

983  
 984 **Figure 1–figure supplement 5**  
 985 **Unthresholded asymmetry effects analysed using a standard brain atlas with no cross-hemispheric registration**  
 986 **of data**  
 987 Mean SA and B) CT asymmetry in each dataset analysed using standard methods on the *fsaverage* template within  
 988 parcels from the HCP multimodal brain atlas<sup>2</sup>. We used this atlas here because it appeared best suited to assess  
 989 parcels that are homotopic. Warm and cold colours depict leftward and rightward asymmetry, respectively.  
 990 Post=posterior; Lat=lateral; Med=medial; Ant=anterior; Sup=superior; Inf=inferior.  
 991

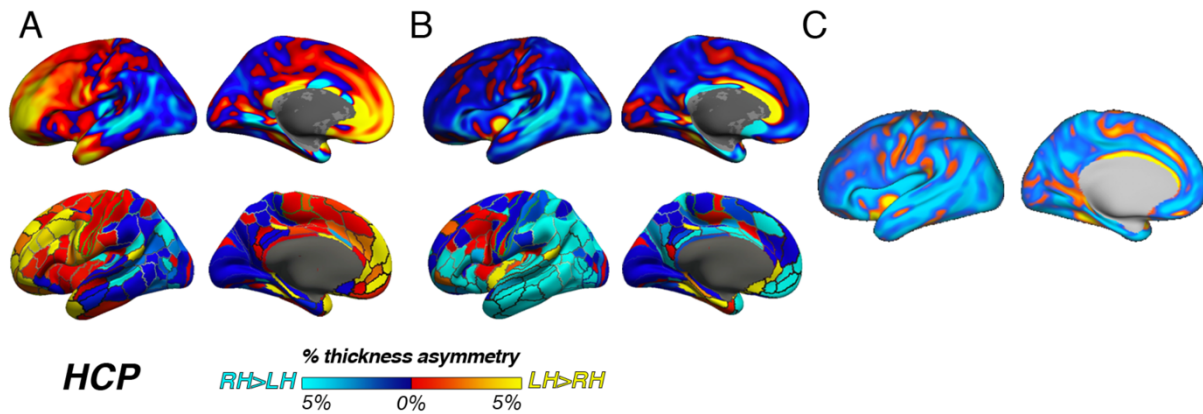

992  
993 **Figure 1–figure supplement 6**  
994 **HCP pipeline**  
995 CT asymmetry results in the HCP dataset vary depending on the preprocessing pipeline. A) Results from using the –  
996 hires argument to recon-all (as in main paper). We used this method to best harmonize preprocessing across cohorts  
997 whilst accounting for the higher resolution of HCP data. Shown again for comparison, the top row in A is akin to the  
998 results in the main paper (analysed using cross-hemispheric registration methods) whereas the bottom row is the same  
999 data analysed using standard parcellation methods (as in Figure 1–figure supplement 5). B) CT asymmetry results  
1000 using the HCP preprocessed data subject to extra preprocessing steps and inputs, analysed using cross-hemispheric  
1001 registration methods (top row) and standard parcellation methods (bottom). C) Results using the HCP preprocessed  
1002 data when calculating thickness asymmetry on the fs\_LR template. Warm and cold colours depict leftward and  
1003 rightward asymmetry, respectively. Post=posterior; Lat=lateral; Med=medial; Ant=anterior; Sup=superior; Inf=inferior.  
1004

1005

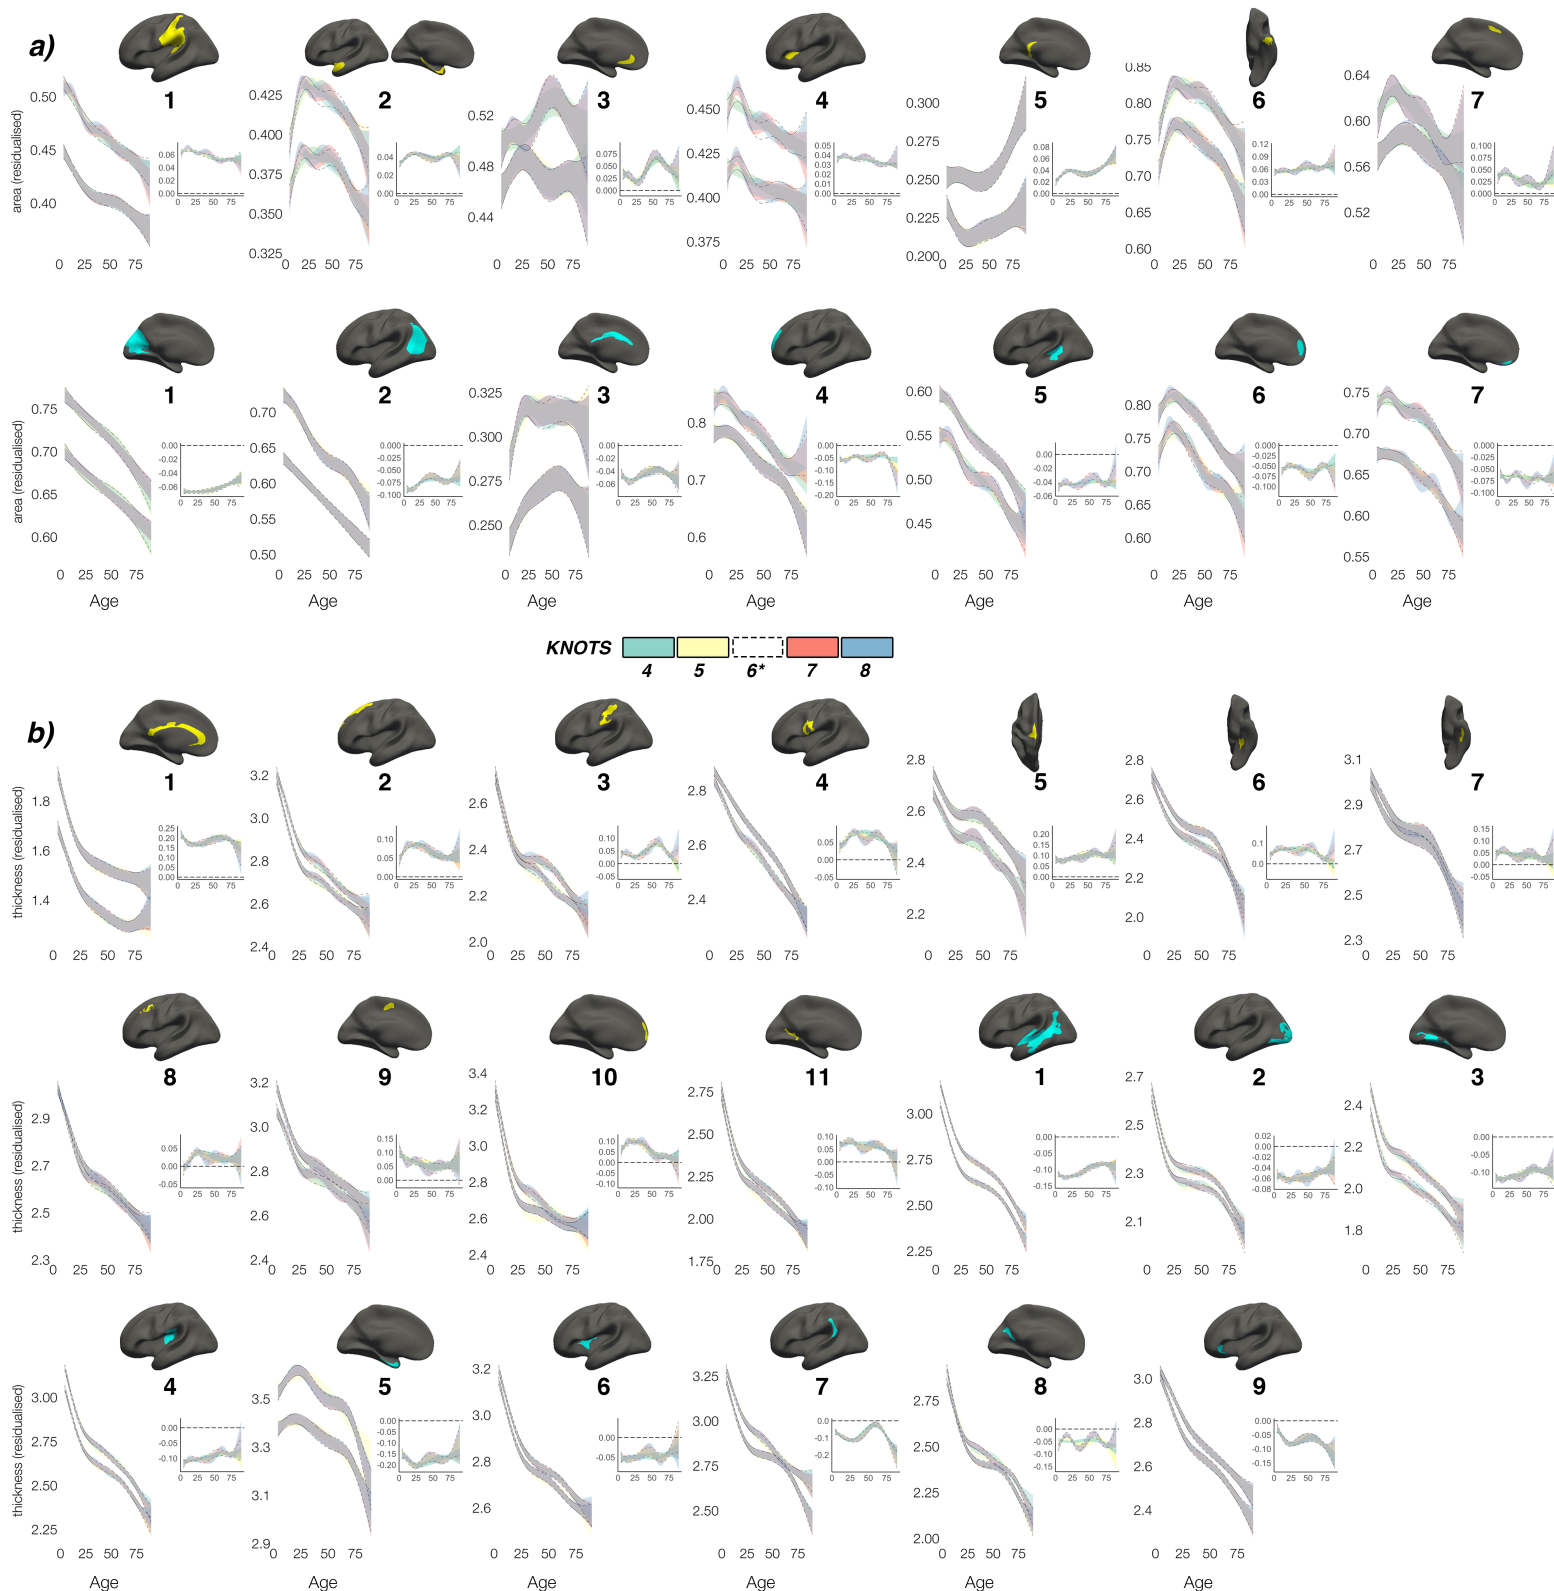

1006 **Figure 3—figure supplement 1**

1007 **Knot comparison**

1008 Lifespan trajectories of population-level **a)** SA and **b)** CT asymmetries modelled with different smoothing parameters  
 1009 (number of knots 4-8, with the selected number of knots [6] shown in black dotted outline). Grey indicates overlap. All  
 1010 age trajectories were fitted using GAMMs. Inset plots show absolute asymmetry trajectories across life at the different  
 1011 smoothing parameters.



1012

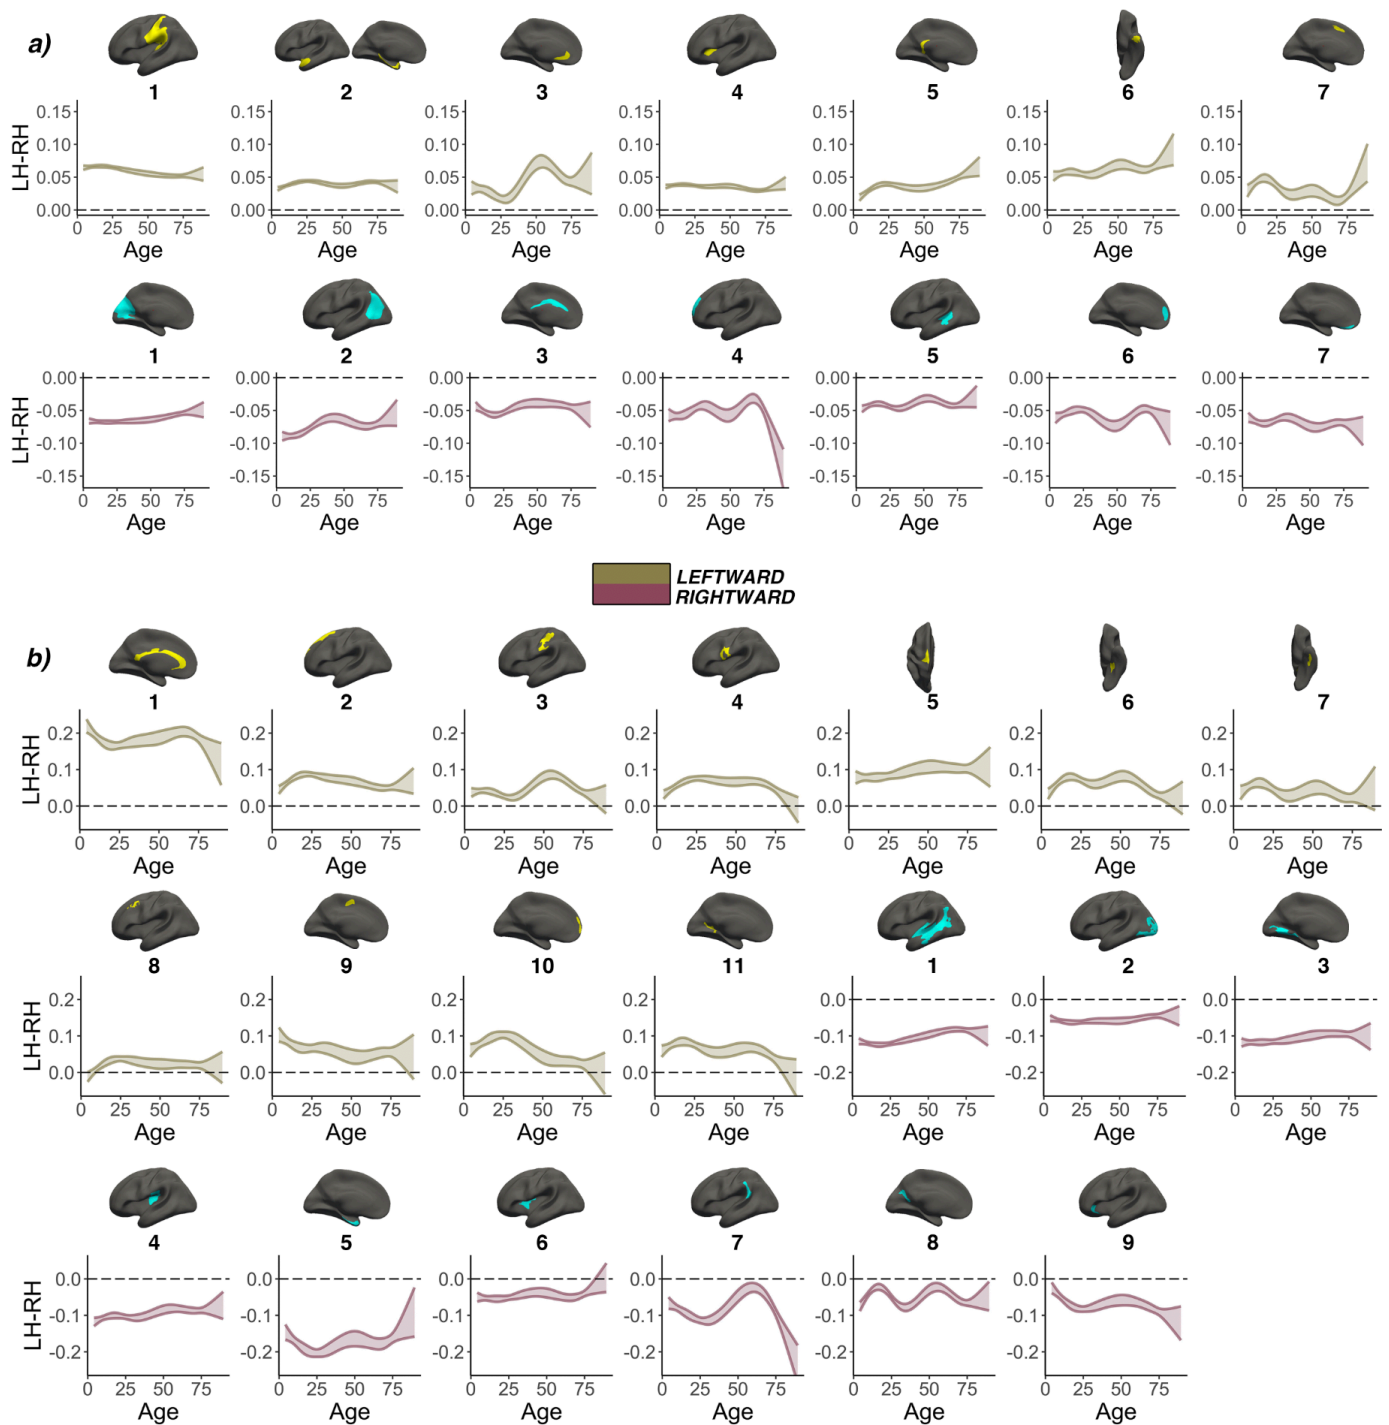

1013

1014 **Figure 3-figure supplement 2**

1015 **Smooth Age x Hemisphere interactions**

1016 Generalized additive mixed Model (GAMM) results for population-level **a)** SA and **b)** CT asymmetries. A smooth Age  $\times$  Hemisphere interaction  $[s(LH)-s(RH)-Age]$  was fitted to model asymmetry changes across the lifespan. Specifically, GAMMs were used to compute the zero-centered age-trajectories of the left  $[s(LH-Age)]$  and right  $[s(RH-Age)]$  hemisphere for each cluster, and the asymmetry trajectory was computed as the difference between the two  $[s(LH-Age)-s(RH-Age)]$ . Gold and pink colours denote clusters defined by leftward or rightward asymmetry, respectively. For each cluster the main effect of Hemisphere was added to visualize the lifespan trajectory of absolute asymmetry. Bands represent 95% confidence intervals. Note that all SA clusters show asymmetry trajectories that are significantly different from 0 (symmetry; dotted line) across the entire lifespan, and 19/20 CT clusters were significantly asymmetric already by  $\sim$ age 4.

1024

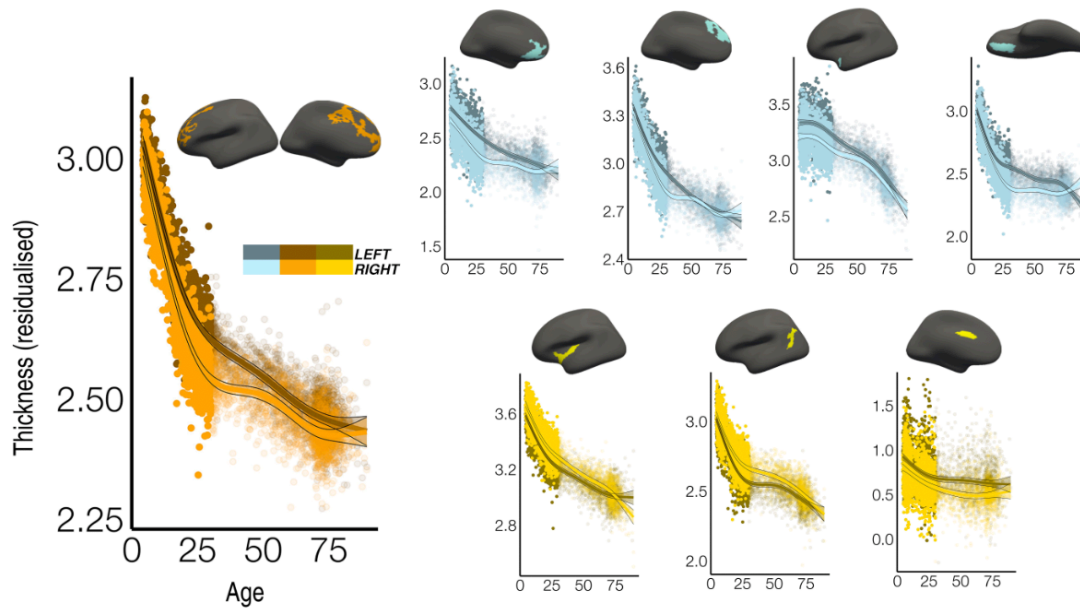

Figure 3–

1025  
1026 **Figure 3–figure supplement 3**  
1027 **Lifespan CT trajectories in regions exhibiting age-related change in asymmetry**  
1028 *Homotopic lifespan CT trajectories in an alternative set of regions derived from a previous analysis (clusters from Roe et al., 2021<sup>3</sup>; derived from vertex-wise analyses of age-related CT asymmetry change in LCBC adult data [20-89 years]).*  
1029 *Dark colours correspond to LH trajectories (colours correspond to clustering solutions in Roe et al., 2021<sup>3</sup>). To highlight*  
1030 *development, datapoints are semitransparent after age 30. All GAMM models are equivalent to those in main paper.*  
1031  
1032

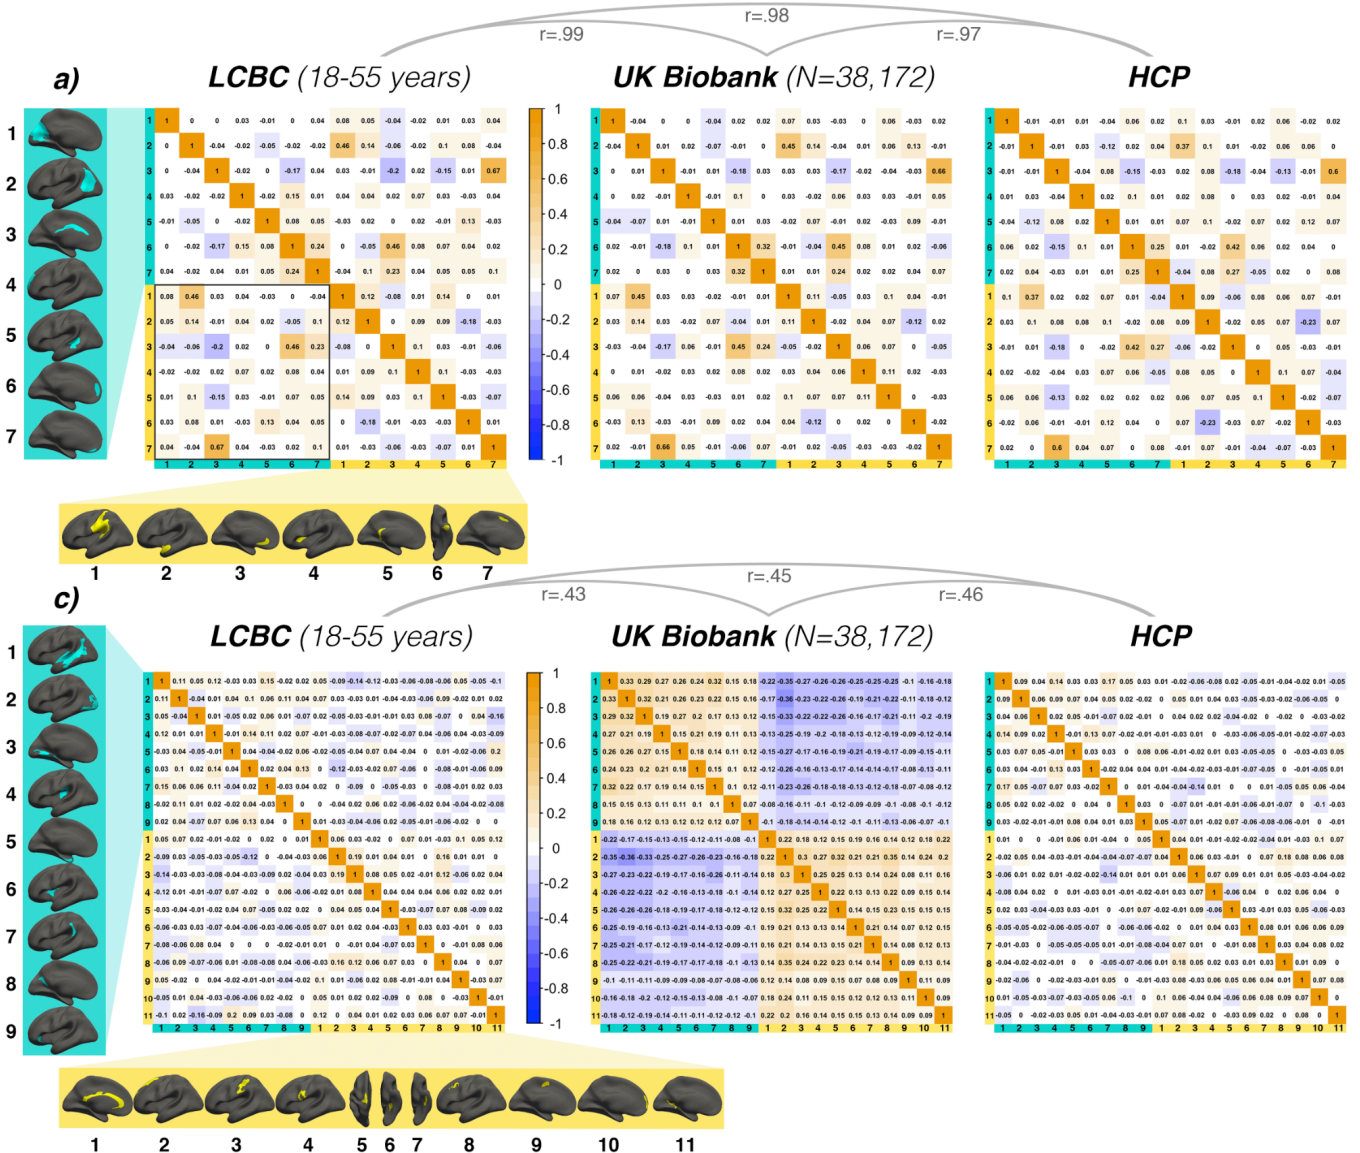

1033  
 1034 **Figure 4—figure supplement 1**  
 1035 **Annotated covariance matrices**  
 1036 *Correlation coefficients of the inter-relationships between robust asymmetry phenotypes exhibiting A) SA asymmetry and*  
 1037 *C) CT asymmetry for each replication dataset (AI's residualized for age, sex and scanner). Rightward AI's are inverted,*  
 1038 *such that positive correlations denote positive asymmetry-asymmetry relationships regardless of direction. Covariance*  
 1039 *structures were highly consistent across replication datasets for SA asymmetry (A;  $r \geq .97$ ) and CT asymmetry (C;  $r \geq .42$ ),*  
 1040 *as revealed by pair-wise whole-matrix comparisons (Mantel tests; results shown above matrices). Black box in A highlights*  
 1041 *the relationships between opposite-direction asymmetries in different regions of cortex (i.e. leftward v rightward regions).*  
 1042 *Yellow and blue clusters/colours denote robust leftward and rightward asymmetries, respectively (clusters numbered for*  
 1043 *reference). Thickness inter-relationships in the lower left quadrant of UK Biobank matrix are visualized in SI Fig. 6.*  
 1044

LH asymmetry RH asymmetry

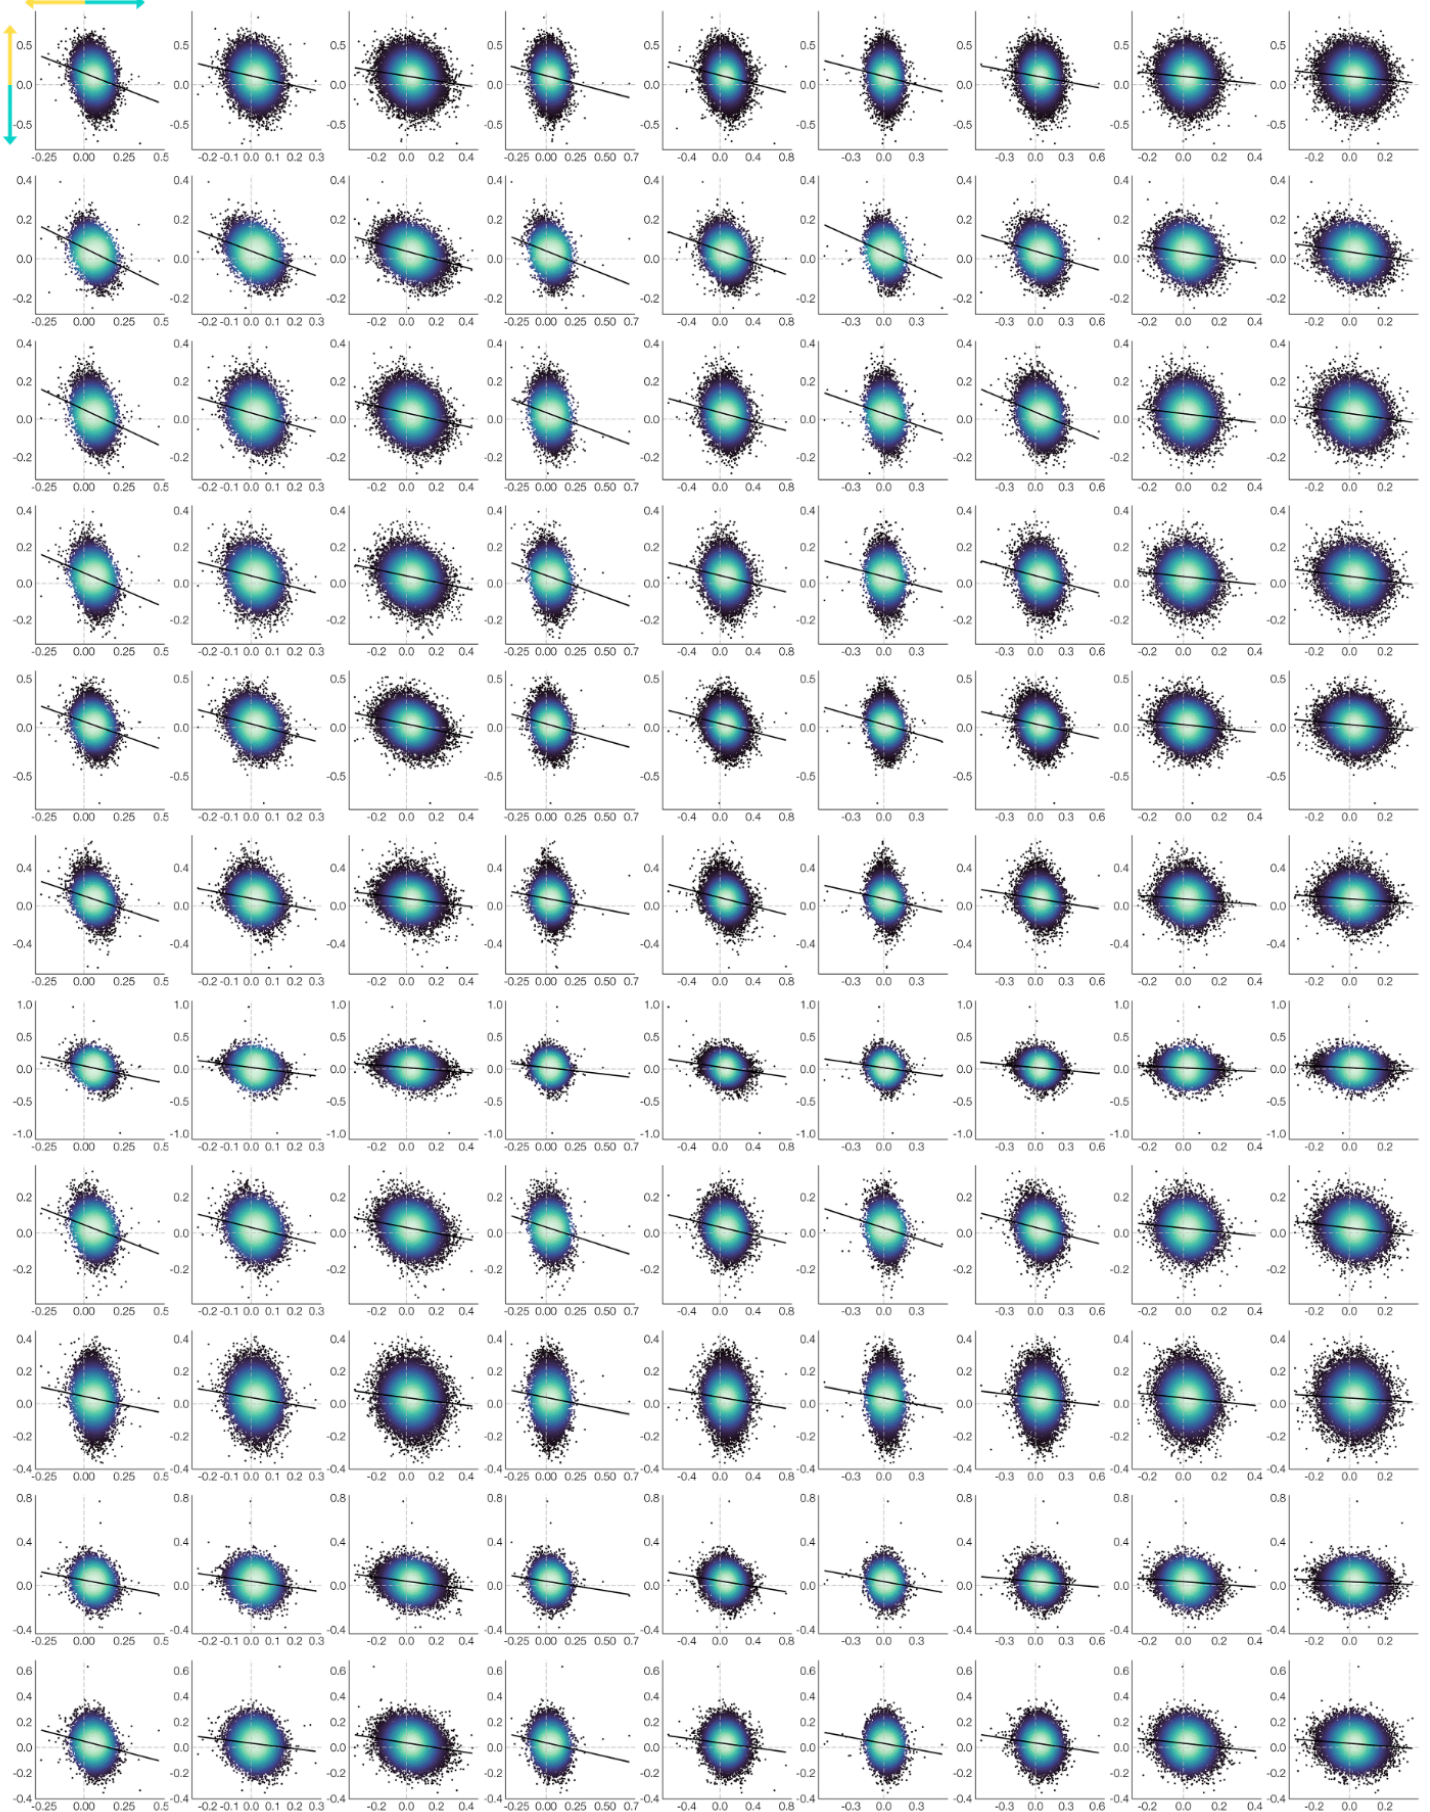

1046 **Figure 4–figure supplement 2**

1047 **SI Fig. 10 – UK Biobank lower quadrant**

1048 Thickness asymmetry interrelationships between opposite-direction asymmetries (lower left quadrant of the UK Biobank  
 1049 correlation matrix in SI. Fig. 3; N = 38,172) are visualized to describe whether negative asymmetry-asymmetry correlations  
 1050 pertained to reduced or reversed thickness asymmetry. Lines of symmetry (0) are shown in grey. X-axis and Y-show raw  
 1051 AI data after removing the fixed effects of age and sex (i.e. data is not scaled to have a mean of 0). AI's in rightward clusters  
 1052 are inverted, such that positive correlations would denote positive asymmetry-asymmetry relationships regardless of  
 1053 direction. Order of cortical locations is in SI. Fig. 3)

1054

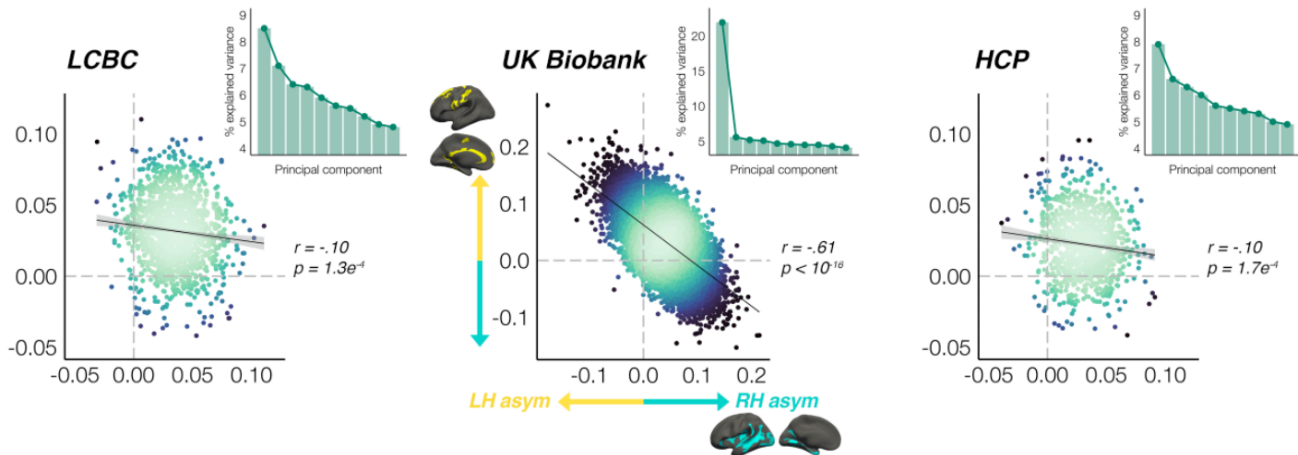

1055

1056

1057 **Figure 4–figure supplement 3**

1058 **SI Fig. 11 – Global thickness asymmetry relationships**

1059 Global thickness asymmetry relationships. Principal components analysis across AI's in all leftward and rightward CT  
 1060 asymmetry clusters revealed a single component explained most of the variance in UK Biobank, and there was evidence  
 1061 of a relatively stronger first component in LCBC and HCP (inset scree plots). Scatter plots show the partial correlation of  
 1062 the mean asymmetry across all leftward vs. all rightward clusters (means weighted by cluster size) plotted for each cohort,  
 1063 after AI's were corrected for age, sex and (where applicable) scanner. Lines of symmetry (0) are shown as dotted grey. AI's  
 1064 in rightward clusters are inverted, such that positive correlations would denote positive asymmetry-asymmetry relationships  
 1065 regardless of direction.

1066

1067

1068

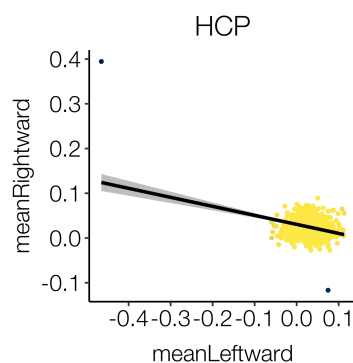

1069 **Figure 4–figure supplement 4**

1070 **HCP outliers discarded**

1071 Two outliers (black) were detected in the cortical thickness data of HCP and subsequently discarded for all subsequent  
 1072 analyses. Plot shows mean CT asymmetry across all leftward vs. mean CT asymmetry across all rightward clusters.

1073

1074

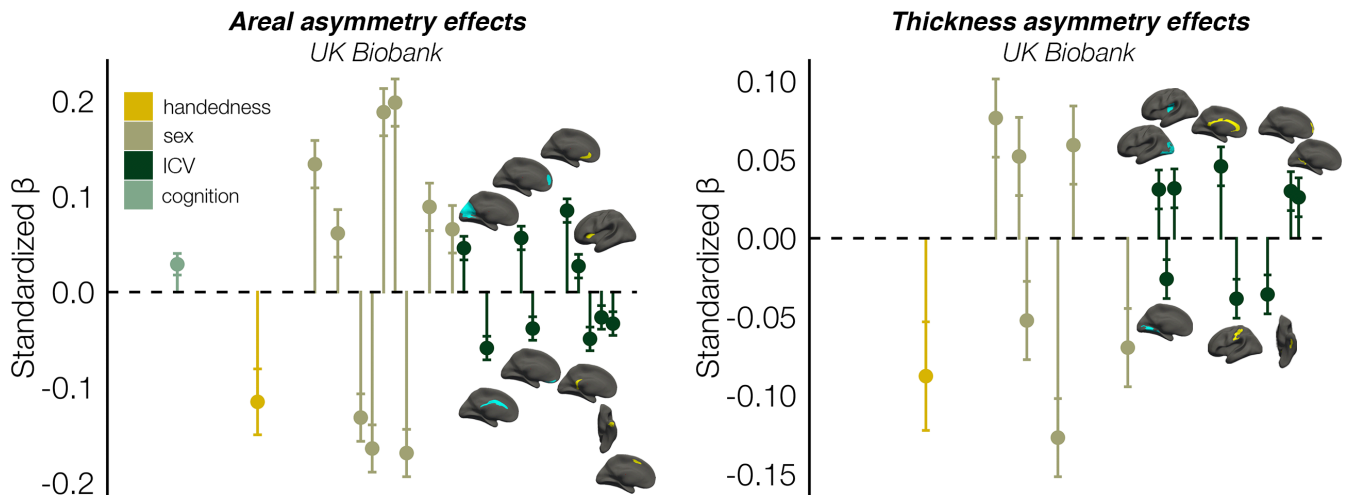

1075 **Figure 6–figure supplement 1**

1076 **ICV effects**

1077 Continuation of Fig. 5 in main paper. Cortical locations of the effects underlying the observed associations of robust SA  
1078 (left) and CT (right) asymmetry phenotypes with brain size (ICV) in UK Biobank. Plots denote the effect sizes  
1079 (standardized Betas) and cortical location of all associations surpassing Bonferroni-corrected significance (Fig. 5). Right  
1080 handers and females are coded 0, such that a negative effect size for handedness / sex / ICV / cognition denotes less  
1081 asymmetry in left handers / males / larger brains / higher cognition. Blue and yellow clusters denote leftward and rightward  
1082 asymmetry, respectively.

1083

1084

1085

1086
