# 1 Tracing the development and lifespan change of population-level 2 structural asymmetry in the cerebral cortex

## 3 4 **Authors and affiliations**

5 James M. Roe<sup>1\*</sup>, Didac Vidal-Piñeiro<sup>1</sup>, Inge K. Amlien<sup>1</sup>, Mengyu Pan<sup>1</sup>, Markus H. Sneve<sup>1</sup>, Michel  
6 Thiebaut de Schotten<sup>2,3</sup>, Patrick Friedrich<sup>4</sup>, Zhiqiang Sha<sup>5</sup>, Clyde Francks<sup>5,6,7</sup>, Yunpeng Wang<sup>1</sup>, Kristine  
7 B. Walhovd<sup>1,8</sup>, Anders M. Fjell<sup>1,8</sup> & René Westerhausen<sup>9</sup>

8  
9 <sup>1</sup>Center for Lifespan Changes in Brain and Cognition (LCBC), Department of Psychology, University of Oslo, Norway.

10 <sup>2</sup>Groupe d'Imagerie Neurofonctionnelle, Institut des Maladies Neurodégénératives-UMR 5293, CNRS, CEA, University of  
11 Bordeaux, Bordeaux, France.

12 <sup>3</sup>Brain Connectivity and Behaviour Laboratory, Sorbonne Universities, Paris, France.

13 <sup>4</sup>Institute of Neuroscience and Medicine (INM-7: Brain and Behaviour), Research Centre Jülich, Jülich, Germany.

14 <sup>5</sup>Language and Genetics Department, Max Planck Institute for Psycholinguistics, Nijmegen, the Netherlands.

15 <sup>6</sup>Donders Institute for Brain, Cognition and Behaviour, Radboud University, Nijmegen, the Netherlands

16 <sup>7</sup>Department of Human Genetics, Radboud University Medical Center, Nijmegen, the Netherlands

17 <sup>8</sup>Department of Radiology and Nuclear Medicine, Oslo University Hospital, Oslo, Norway.

18 <sup>9</sup>Section for Cognitive and Clinical Neuroscience, Department of Psychology, University of Oslo, Norway.

19  
20  
21 \*Address correspondence to James M. Roe, Department of Psychology, PO Box 1094 Blindern, 0317 Oslo, Norway.

22 Email: [j.m.roe@psykologi.uio.no](mailto:j.m.roe@psykologi.uio.no)

23  
24 **Running title:** Development of population-level cortical asymmetry

25 **Keywords:** Brain development, lateralization, population neuroscience, lifespan

26 **Open access license:** yes

27  
28 The authors declare no competing interests

## 29 30 31 **Abstract**

32 Cortical asymmetry is a ubiquitous feature of brain organization that is subtly altered in some neurodevelopmental  
33 disorders, yet we lack knowledge of how its development proceeds across life in health. Achieving consensus on the  
34 precise cortical asymmetries in humans is necessary to uncover the genetic and later influences that shape them, such  
35 as age. Here, we delineate population-level asymmetry in cortical thickness and surface area vertex-wise in 7 datasets  
36 and chart asymmetry trajectories longitudinally across life (4-89 years; observations = 3937; 70% longitudinal). We find  
37 replicable asymmetry interrelationships, heritability maps, and test asymmetry associations in large-scale data. Cortical  
38 asymmetry was robust across datasets. Whereas areal asymmetry is predominantly stable across life, thickness  
39 asymmetry grows in childhood and peaks in early adulthood. Areal asymmetry correlates phenotypically and genetically  
40 in specific regions, and is low-moderately heritable (max  $h^2_{\text{SNP}} \sim 19\%$ ). In contrast, thickness asymmetry is globally  
41 interrelated across the cortex in a pattern suggesting highly left-lateralized individuals tend towards left-lateralization also  
42 in population-level right-asymmetric regions (and vice versa), and exhibits low or absent heritability. We find less areal  
43 asymmetry in the most consistently lateralized region in humans associates with subtly lower cognitive ability, and confirm  
44 small handedness and sex effects. Results suggest areal asymmetry is developmentally stable and arises in early life  
45 through genetic but mainly subject-specific stochastic effects, whereas childhood developmental growth shapes  
46 thickness asymmetry and may lead to directional variability of global thickness lateralization in the population.

## 51 **1. Introduction**

52 The brain's hemispheres exhibit high contralateral symmetry<sup>1,2</sup>, homotopic regions are under similar genetic influence  
53<sup>3-5</sup> and show highly correlated developmental change<sup>3,6</sup>. Despite this, structural asymmetry is also a ubiquitous aspect  
54 of brain organization<sup>7,8</sup>. Cortical thickness and surface area are known to exhibit distinct asymmetry patterns<sup>7,9</sup>, albeit  
55 reported inconsistently<sup>7,8,18-22,10-17</sup>. Yet achieving consensus on cortical asymmetries in humans is a prerequisite to  
56 uncover the genetic-developmental and lifespan influences that shape and alter them. Although an extensive literature  
57 in search of structural asymmetry deviations in various conditions and disorders is in several cases being challenged by  
58 newer data<sup>23</sup>, at least some aspects of cortical asymmetry are confirmed to be subtly reduced in neurodevelopmental  
59 disorders such as autism<sup>24,25</sup>, but also through later life influences such as aging<sup>18</sup>, and Alzheimer's disease<sup>18,26</sup>. Hence,  
60 altered cortical asymmetry at various lifespan stages may be associated with reduced brain health. However, it is  
61 currently unknown how cortical asymmetry development proceeds across life in health, because no previous study has  
62 charted cortical asymmetry trajectories from childhood to old age using longitudinal data.

63  
64 Compounding the lack of longitudinal investigation, previous large-scale studies do not delineate the precise brain  
65 regions exhibiting robust cortical asymmetry<sup>7</sup>, relying on brain atlases with predefined anatomical boundaries that may  
66 not conform well to the underlying asymmetry of cortex<sup>7,27</sup>. Taking an atlas-free approach to delineate asymmetries that  
67 reliably reproduce across international samples as starting point (i.e. population-level asymmetries) would better enable  
68 mapping of the developmental principles underlying structural cortical asymmetries, as well as the genetic and individual-  
69 specific factors associated with cortical lateralization. Furthermore, such an approach would help resolve the many  
70 reported inconsistencies for cortical asymmetry maps<sup>7,8,18-21,10-17</sup> – e.g. reports of both right- and left- thickness  
71 lateralization in medial<sup>(11,13,14,28 and 17-20)</sup> and lateral prefrontal cortex (PFC; <sup>17,18,20,22,28 and 8,10-12,16</sup>), and right-<sup>11,31</sup> and  
72 left-<sup>7,29,30</sup> areal lateralization of superior temporal sulcus (STS) – while serving as a high-fidelity phenotype for future  
73 brain asymmetry studies to complement existing low-resolution atlases<sup>7</sup>.

74  
75 Determining the developmental and lifespan trajectories of cortical asymmetry may shed light on how cortical  
76 asymmetries are shaped through childhood or set from early life, and provide evidence of the timing of expected brain  
77 change in normal development. Although important in and of itself, this would also provide a useful normative reference,  
78 as subtly altered cortical asymmetry – in terms of both area and thickness – has been linked at the group-level to  
79 neurodevelopmental disorders along the autism spectrum<sup>24,25</sup>, suggesting altered lateralized neurodevelopment may be  
80 a neurobiologically relevant outcome in at least some cases of developmental perturbation<sup>24,25</sup>. For areal asymmetry,  
81 surprisingly few studies have charted developmental<sup>30,31</sup> or aging-related effects<sup>7,28</sup>, although indirect evidence in  
82 neonates suggests adult-like patterns of areal asymmetry are evident at birth and may exhibit little change from birth to  
83 2 years<sup>31</sup> despite rapid and concurrent developmental cortical expansion<sup>32</sup>. For thickness asymmetry, longitudinal  
84 increases in asymmetry have been shown during the first two years of life<sup>19</sup>, with suggestions of rapid asymmetry growth  
85 from birth to 1 year<sup>19</sup>, and potentially continued growth until adolescence<sup>33</sup>. However, previous lifespan studies mapped  
86 thickness asymmetry linearly across cross-sectional developmental and adult age-ranges<sup>10,17</sup>, mostly concluding  
87 thickness asymmetry is minimal in infancy and maximal age ~60. In contrast, recent work established thickness  
88 asymmetry shows a non-linear decline from 20 to 90 years that is reproducible across longitudinal aging cohorts<sup>18</sup>. Thus,  
89 although offering viable developmental insights<sup>10,17</sup>, previous lifespan studies of thickness asymmetry do not accurately  
90 capture the aging process, and likely conflate non-linear developmental and aging trajectories with linear models. A  
91 longitudinal exploration of the lifespan trajectories of thickness asymmetry accounting for dynamic change is needed to  
92 further knowledge of normal human brain development.

93  
94 Correlations between cortical asymmetries may provide a window on asymmetries formed under common genetic or  
95 developmental influences. Contemporary research suggests brain asymmetries are complex, multifactorial and largely  
96 independent (i.e. uncorrelated) traits<sup>34-36</sup>, contrasting earlier theories emphasizing a single<sup>37,38</sup> or predominating factor  
97<sup>39,40</sup> controlling various cerebral lateralizations. Yet while there has been much research on whether asymmetries of  
98 various morphometric measures<sup>8,11,16</sup> or imaging modalities<sup>29</sup> relate to one another, few have focused on interregional  
99 relationships between asymmetries derived from the same metric. Where reported, evidence suggests cortical  
100 asymmetries may be mostly independent<sup>27,41,42</sup> – in line with a multifactorial view<sup>34,35,43</sup> – and a recent study found  
101 asymmetry in anatomically connected regions of the cortical language network was no more related than in regions  
102 selected at random<sup>29</sup>. Currently, it is not known whether or how cortical asymmetries may correlate within individuals,  
103 though this may signify coordinated genetic or later development of left-right brain asymmetries – a genetic or later  
104 developmental account depending on joint evidence of trait heritability, and whether or not phenotypic correlations are  
105 underpinned by genetic correlations.

106  
107 Finally, altered development of cerebral lateralization in general has been widely hypothesized to relate to average poorer  
108 cognitive outcomes<sup>17,44,45</sup>. Specifically in the context of cortical asymmetry, however, although one previous study  
109 reported larger thickness asymmetry may relate to better verbal and visuospatial cognition<sup>17</sup>, phenotypic asymmetry-  
110 cognition associations have been rarely reported<sup>17,46,47</sup>, conflicting<sup>46,47</sup>, not directly comparable<sup>17,46</sup>, and to date remain  
111 untested in large-scale data. Still, recent work points to small but significant overlap between genes underlying  
112 multivariate brain asymmetries and those influencing educational attainment and specific developmental disorders  
113 impacting cognition<sup>27</sup>, indicating either pleiotropy between non-related traits or capturing shared genetic susceptibility to  
114 altered brain lateralization and cognitive outcomes. Furthermore, most large-scale studies of the factors widely assumed  
115 to be important in the context of asymmetry have adopted brain atlases offering limited spatial precision<sup>7,23,27</sup>.  
116 Accordingly, such studies did not detect associations with handedness<sup>7,48</sup> that were not found until a recent study applied  
117 higher resolution (i.e. vertex-wise) mapping in big data<sup>22</sup>. Therefore, as a final step, we reasoned that combining an

118 optimal delineation of population-level cortical asymmetries with big data would enhance detection and quantification of  
119 such effects – i.e. general cognitive ability, handedness and sex.

120  
121 Here, we first delineate population-level cortical areal and thickness asymmetries using vertex-wise analyses and their  
122 overlap in 7 international datasets. To gain insight into their development, we then trace a series of lifespan and genetic  
123 analyses. Specifically, we chart the developmental and lifespan trajectories of cortical asymmetry for the first time  
124 longitudinally across the lifespan. We then examine phenotypic interregional asymmetry correlations – under the  
125 assumption correlations indicate coordinated development of left-right asymmetries through genes or lifespan influences  
126 – test heritability using both extended twin and genome-wide single nucleotide polymorphism (SNP) data, and whether  
127 phenotypic associations are underpinned by genetics. Finally, we screened our set of robust, population-level  
128 asymmetries for association with general cognitive ability and factors purportedly related to asymmetry in UK Biobank  
129 (UKB)<sup>49</sup>. Based on findings of aging-related dedifferentiation in thickness asymmetry<sup>18</sup>, we hypothesized trajectories of  
130 cortical thickness would show developmental growth in thickness asymmetry (i.e. differentiation), but remained agnostic  
131 regarding lifespan areal asymmetry development.

132  
133

## 134 **2. Results**

### 135 **2.1 Population-level asymmetry of the cerebral cortex**

136 First, to delineate cortical regions exhibiting population-level areal and thickness asymmetry, we assessed asymmetry  
137 vertex-wise in 7 independent adult samples and quantified overlapping effects (Methods). Areal asymmetries were highly  
138 consistent across all 7 datasets (Figure 1A): the spatial correlation between surface AI maps ranged from  $r = .88$  to  $.97$   
139 (Figure 1C). Across all 7 datasets (Figure 1D), overlapping effects for strong leftward areal asymmetry were observed in  
140 a large cluster in supramarginal gyrus (SMG) that spanned postcentral gyrus, planum temporale and primary auditory  
141 regions (and conformed well to their anatomical boundaries; see Figure 1–figure supplement 1A for significance), anterior  
142 insula and temporal cortex, rostral anterior cingulate, medial superior frontal cortex, and precuneus, the latter spanning  
143 parahippocampal and entorhinal cortex. Overlapping effects for strong rightward areal asymmetry were evident in  
144 cingulate, inferior parietal cortex, STS, medial occipital cortex, mPFC and rostral middle frontal cortex (Figure 1D). This  
145 global pattern agrees with previous reports<sup>7,21,22</sup>.

146 For thickness, an anterior-posterior pattern of left-right asymmetry was evident in most datasets (Figure 1B), consistent  
147 with more recent reports<sup>7,17,18,22,28</sup>. Though spatial correlations between AI maps from independent datasets were high,  
148 they were notably more variable ( $r = .33 - .93$ ; Figure 1C); HCP showed lower correlation with all datasets ( $r = .33 - .46$ )  
149 whereas all other datasets correlated highly (min  $r = .78$ ). Consistent leftward thickness asymmetry effects were evident  
150 in cingulate, postcentral gyrus, and superior frontal cortex (Figure 1E), whereas consistent effects for rightward thickness  
151 asymmetry were evident in a large cluster in and around STS (Fig 1E; Figure 1–figure supplement 1B), insula, lingual  
152 gyrus, parahippocampal and entorhinal cortex. Of note, both areal and thickness asymmetry extended beyond these  
153 described overlapping effects (Figure 1–figure supplements 1-2 & 5).

154 Based on effect size criteria (Figure 1D-E; Methods), we derived a set of robust clusters exhibiting population-level areal  
155 (14 clusters) and thickness asymmetry (20 clusters) for further analyses (see Supplementary file 1E-F for anatomical  
156 descriptions). The proportion of individuals lateralized in the population direction in each cluster was highly similar across  
157 datasets, on average ranging between 61-94% for area, and 57-90% for thickness (Figure 1F-I). We then formally  
158 compared our approach to asymmetry estimates derived from a gyral-based atlas often used to assess asymmetry<sup>7,16,27</sup>,  
159 finding fairly poor correspondence with the vertex-wise structure of cortical asymmetry for atlas-based regions,  
160 particularly for thickness asymmetry (Figure 1–figure supplement 3).

161

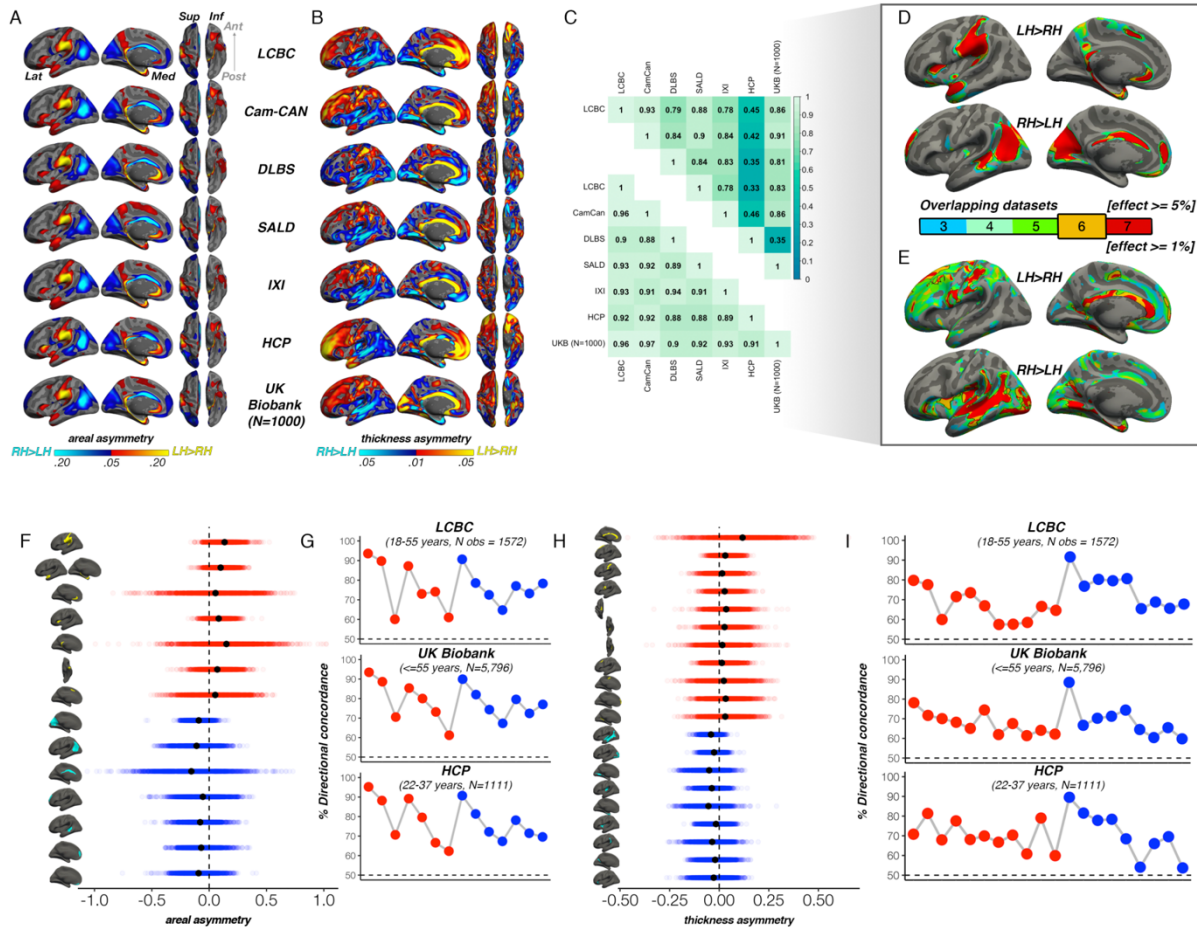

162  
 163 **Figure 1. A)** Mean areal and **B)** thickness asymmetry in each dataset. Warm and cold colours depict leftward and  
 164 rightward asymmetry, respectively. **C)** Spatial overlap (Pearson's  $r$ ) of the unthresholded maps between datasets for  
 165 areal (lower matrix) and thickness asymmetry (upper). **D)** Overlapping effects across datasets were used to delineate  
 166 clusters exhibiting population-level areal (lower threshold = 5%) and **E)** thickness asymmetry (lower threshold = 1%)  
 167 based on a minimum 6-dataset overlap (black outlined clusters). **F, H)** Raw distribution of the individual-level  
 168 asymmetry index (AI) in adults extracted from clusters exhibiting areal and thickness asymmetry, respectively. Mean AI's are in black,  
 169 Raw distributions are shown for the LCBC (18-55 years, N obs = 1572) dataset with mixed effects data (outliers defined in lifespan  
 170 analysis removed on a region-wise basis; Methods; Supplementary File 1E-F). X-axis denotes the AI of the average  
 171 thickness and area of a vertex within the cluster. **G, I)** Proportion of individuals with the expected directionality of  
 172 asymmetry within each cluster exhibiting areal and thickness asymmetry, respectively, shown for the three largest adult  
 173 datasets. The X-axes in G and I are ordered according to the clusters shown in F and H, respectively. Lat=lateral;  
 174 Med=medial; Post=posterior; Ant=anterior; Sup=superior; Inf=inferior.

## 175 176 177 178 179 **2.2 Lifespan trajectories of population-level cortical asymmetries**

180 Having delineated regions exhibiting population-level areal and thickness asymmetry, we aimed to characterize the  
 181 developmental and lifespan trajectories of cortical asymmetry from early childhood to old age, using a lifespan sample  
 182 incorporating dense longitudinal data (Methods). For this, we used the mixed-effects LCBC lifespan sample covering the  
 183 full age-range (4-89 years). To account for non-linear lifespan change, we used Generalized Additive Mixed Models  
 184 (GAMMs) to model the smooth left- (LH) and right hemisphere (RH) age-trajectories in our robust clusters (Methods).  
 185

186 In all clusters, the homotopic areal trajectories revealed areal asymmetry was strongly established already by age ~4,  
 187 and the lifespan trajectories of both leftward (Figure 2A) and rightward (Figure 2B) asymmetries were largely parallel.  
 188 Specifically, a large left-asymmetric region in and around SMG/perisylvian (#1; Figure 2A) showed strong asymmetry by  
 189 age ~4 that was largely maintained throughout life through steady aging-associated decline of both hemispheres,  
 190 whereas leftward asymmetry of temporal cortex (#2,6) and anterior insular (#4) was maintained through developmental  
 191 expansion and aging-associated decline of both hemispheres. Others (retrosplenial #5; mPFC #3,7) showed growth from  
 192 pre-established asymmetry and more variable lifespan trajectories. On the other side, rightward asymmetries showed  
 193 largely preserved asymmetry through aging-associated decline of both hemispheres (Figure 2B; medial occipital #1;  
 194 lateral parietal #2; STS #5; orbitofrontal #7), through bilateral developmental expansion and aging-associated decline  
 195 (mPFC #6), or steadily expanding bilateral surface area until mid-life (cingulate; #3). There was also little indication of

196 relative hemispheric differences during cortical developmental expansion from 4-30 years ([Figure 3–figure supplement](#)  
197 [3A](#)) or aging from 30-89 years ([Figure 3–figure supplement 5](#)). Though lifespan areal asymmetry trajectories did show  
198 significant change at some point throughout life in most clusters ([Supplementary file 1E](#)), factor-smooth GAMM  
199 interaction analyses confirmed that areal asymmetry was significantly different from zero across the entire lifespan in all  
200 clusters ([Figure 3–figure supplements 1-2](#)), and the average trajectories across all leftward and rightward clusters were  
201 clearly parallel (though still both exhibited a significant difference; bordered plots in [Figure 2A-B](#); [Supplementary file 1E](#)).  
202

203 In contrast, though homotopic trajectories of thickness clusters were more variable, they were non-parallel, and mostly  
204 characterized by developmental increase in thickness asymmetry from age 4-30, through seemingly unequal rates of  
205 continuous thinning between hemispheres ([Figure 3](#); [Figure 3–figure supplements 1-3](#)). Importantly, in 10/20 clusters the  
206 data indicated developmental increase in thickness asymmetry corresponded to a significant relative hemispheric  
207 difference in the rate of developmental thinning. Mostly, these conformed to a pattern whereby the thicker homotopic  
208 hemisphere thinned comparatively slower ([Figure 4](#)): leftward thickness asymmetry developed through comparatively  
209 slower thinning of the LH that was significant in 6 clusters (superior, lateral and medial PFC #2 #8 #10, precentral #4,  
210 inferior temporal #6, calcarine #11; [Figure 3A](#); [Figure 4](#)), whereas rightward asymmetry developed through significantly  
211 slower RH thinning (STS #1, planum temporale #7, anterior insula #9; [Figure 3A](#); [Figure 4](#)), or significantly faster RH  
212 thickening (#5 entorhinal). Only one other cluster exhibited a relative hemispheric difference seemingly driven by faster  
213 thinning of the thicker hemisphere (#8 posterior cingulate; [Figure 4](#)). In these clusters, asymmetry development was  
214 generally evident until a peak in early adulthood (median age at peak = 24.3; see [Figure 4](#)) for both leftward and rightward  
215 clusters, around a point of inflection to less developmental thinning (see also [Figure 3–figure supplement 4](#)). The average  
216 trajectories across all leftward and rightward clusters also indicated developmental asymmetry increase (bordered plots;  
217 [Figure 3](#)). Despite the developmental growth, factor-smooth GAMMs nevertheless confirmed the developmental  
218 foundation for thickness asymmetry was already established by age ~4 (95% of clusters exhibited small but significant  
219 asymmetry at age ~4; [Figure 3–figure supplement 2B](#)), and again asymmetry trajectories showed significant change at  
220 some point throughout life ([Supplementary file 1F](#)). Across clusters delineated here we observed little evidence aging-  
221 related change from 30-89 years corresponded to a relative hemispheric difference in the rate of aging-related thinning,  
222 except in regions overlapping with our previous report<sup>18</sup> (e.g. medial PFC #10; [Figure 3–figure supplement 5B](#); [Figure](#)  
223 [3–figure supplement 4](#)). Thus, across population-level thickness asymmetries, the data indicated either developmental  
224 growth in asymmetry, or conserved relative asymmetry through development and aging despite absolute asymmetry  
225 change. Results were robust to varying the number of knots used to estimate trajectories ([Figure 3–figure supplement](#)  
226 [1](#)).  
227

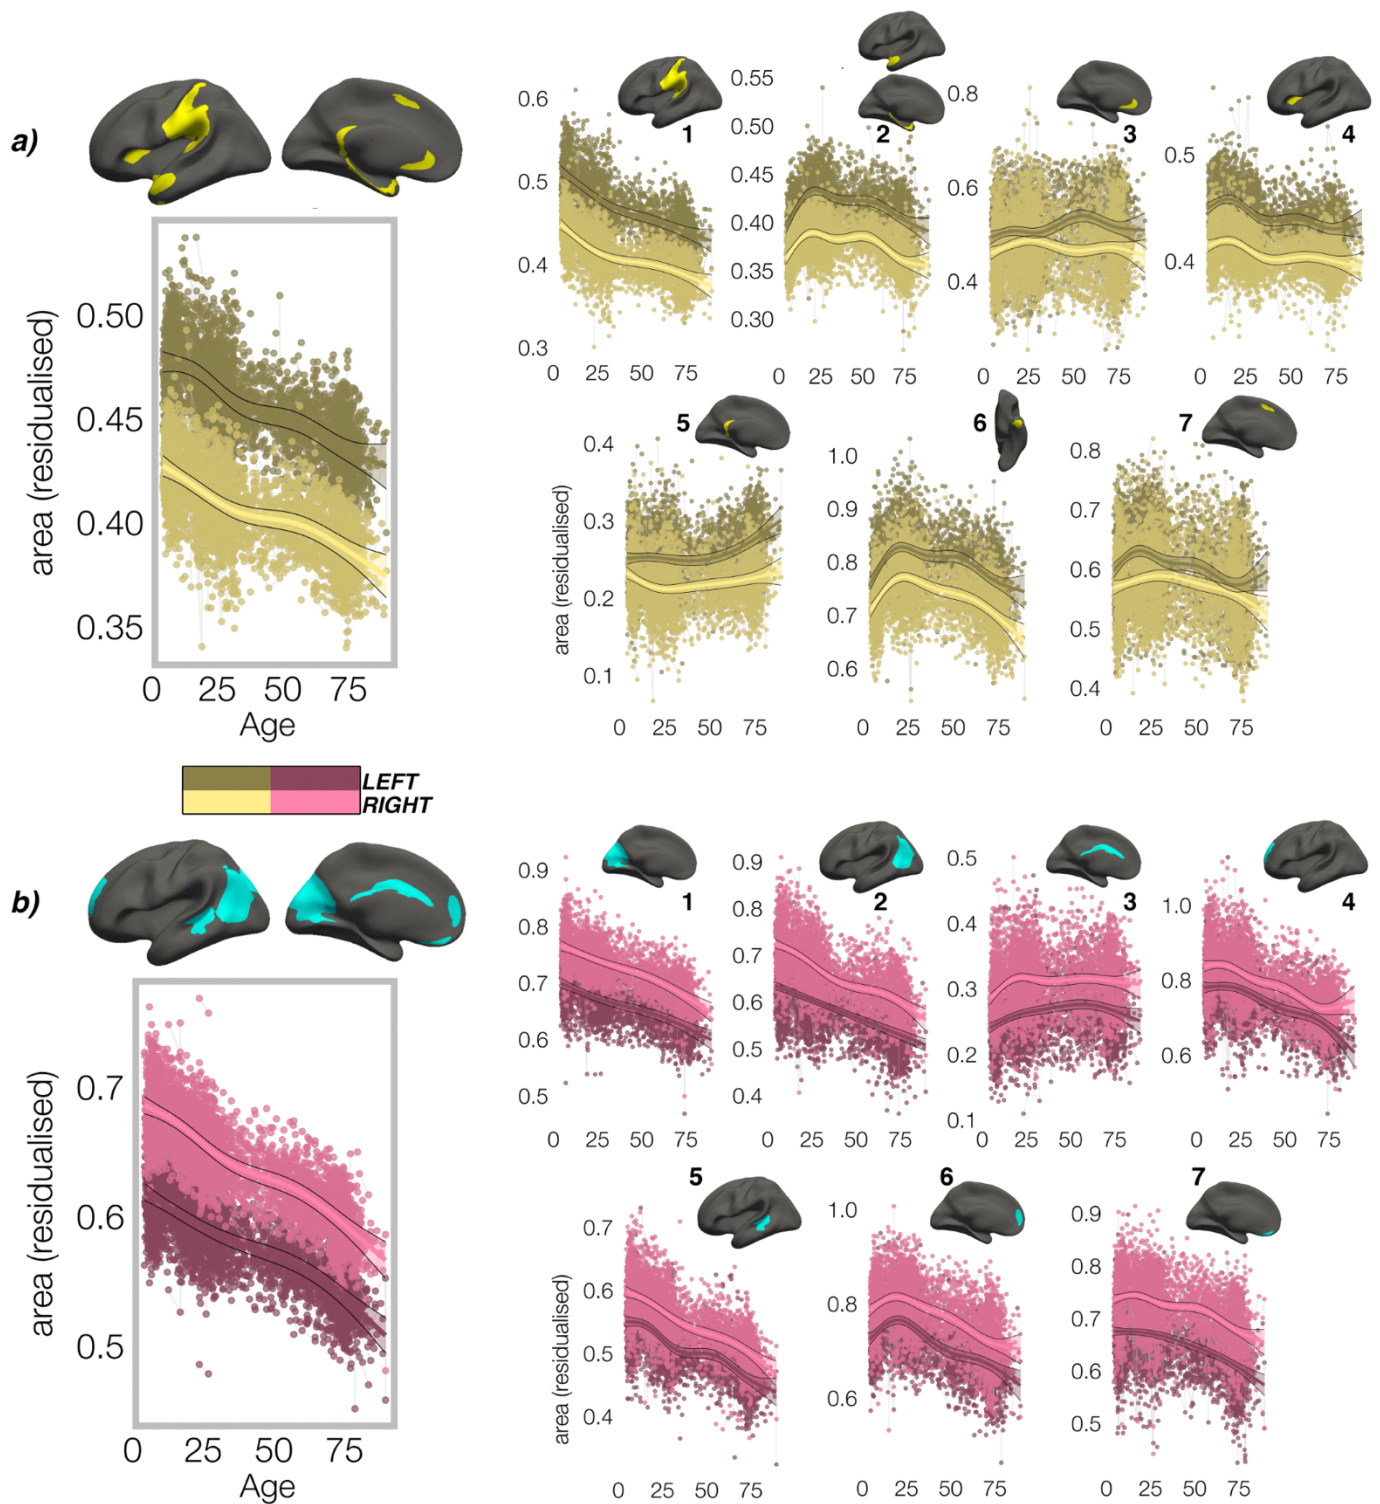

228  
 229  
 230 **Figure 2:** Homotopic lifespan trajectories of surface area in clusters exhibiting population-level **A)** leftward (yellow plots;  
 231 yellow clusters) and **B)** rightward (pink plots; blue clusters) areal asymmetry ( $\text{mm}^2$ ). Larger plots on the left show the  
 232 mean age trajectory across all clusters exhibiting leftward (top) and rightward (bottom) asymmetry. Note that the unit of  
 233 measurement is the average surface area of a vertex within the cluster. Dark colours correspond to LH trajectories. All  
 234 age trajectories were fitted using GAMMs. Data is residualized for sex, scanner and random subject intercepts. Clusters  
 235 are numbered for reference.  
 236  
 237  
 238  
 239

240  
241

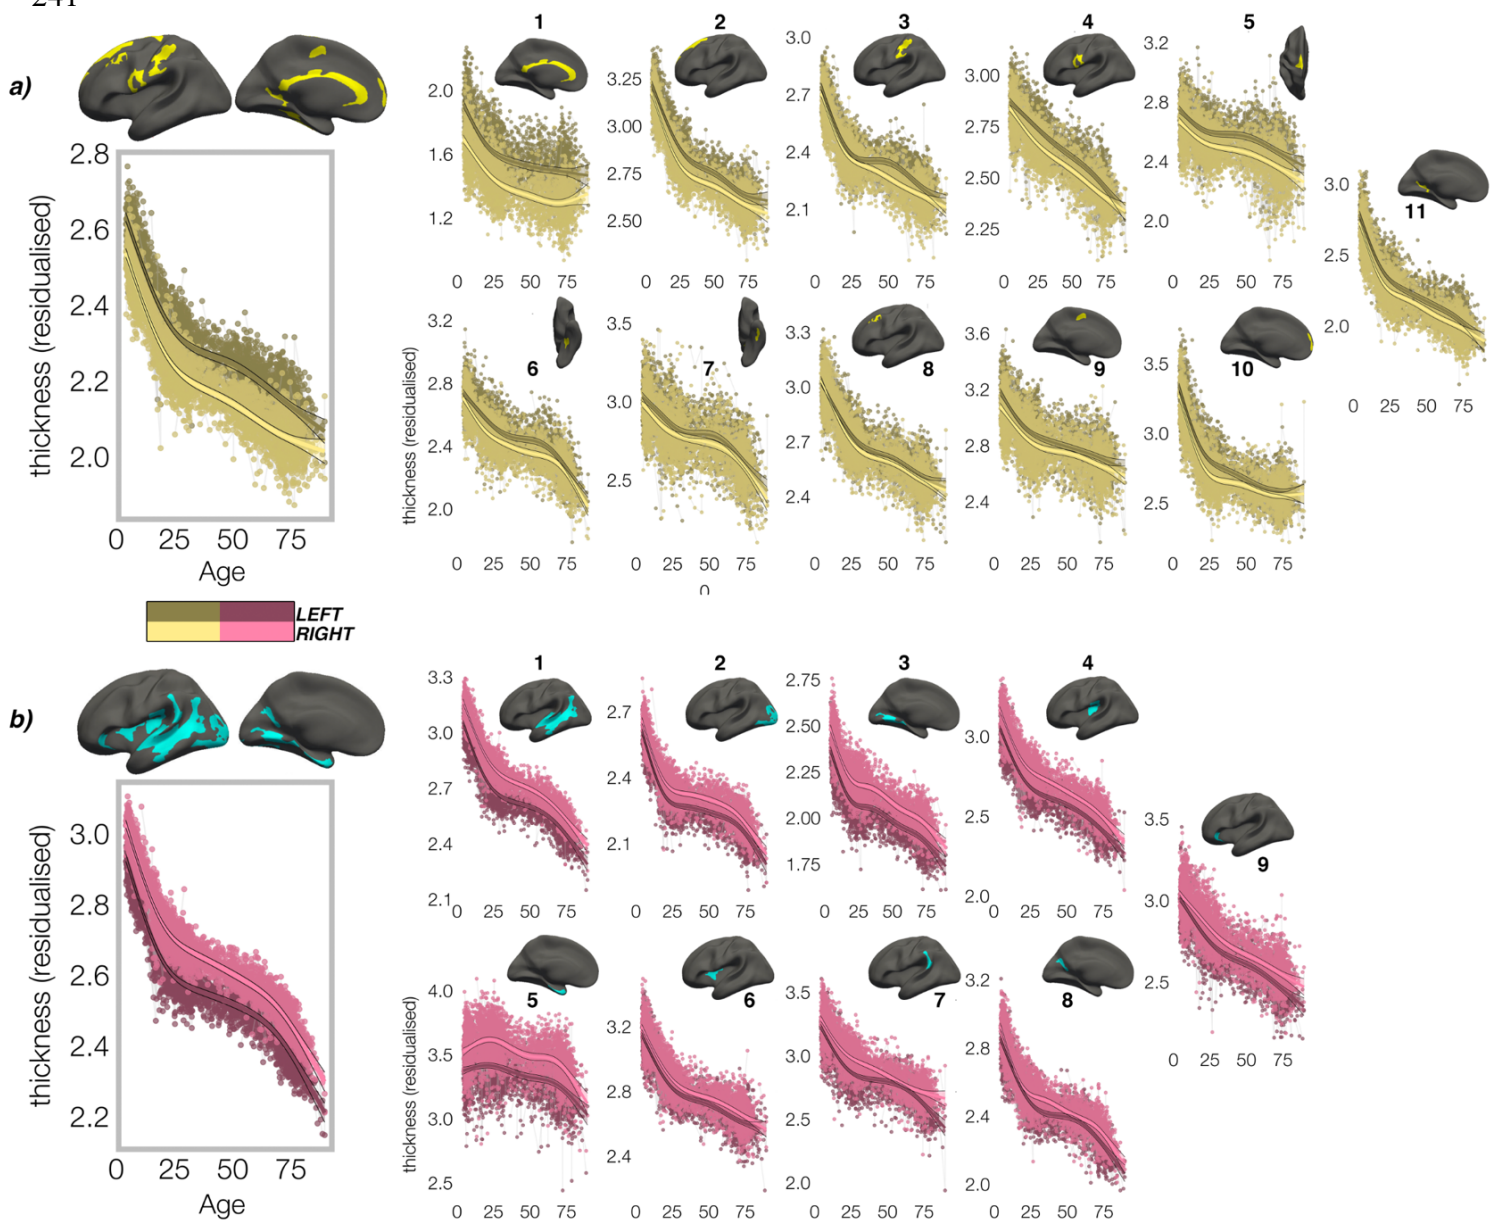

242  
243  
244  
245  
246  
247  
248

**Figure 3:** Homotopic lifespan trajectories of cortical thickness in clusters exhibiting population-level **A)** leftward (yellow plots; yellow clusters) and **B)** rightward (pink plots; blue clusters) thickness asymmetry (mm). Larger plots on the left show the mean age trajectory across all clusters exhibiting leftward (top) and rightward (bottom) asymmetry. Dark colours correspond to LH trajectories. All age trajectories were fitted using GAMMs. Data is residualized for sex, scanner and random subject intercepts. Clusters are numbered for reference.

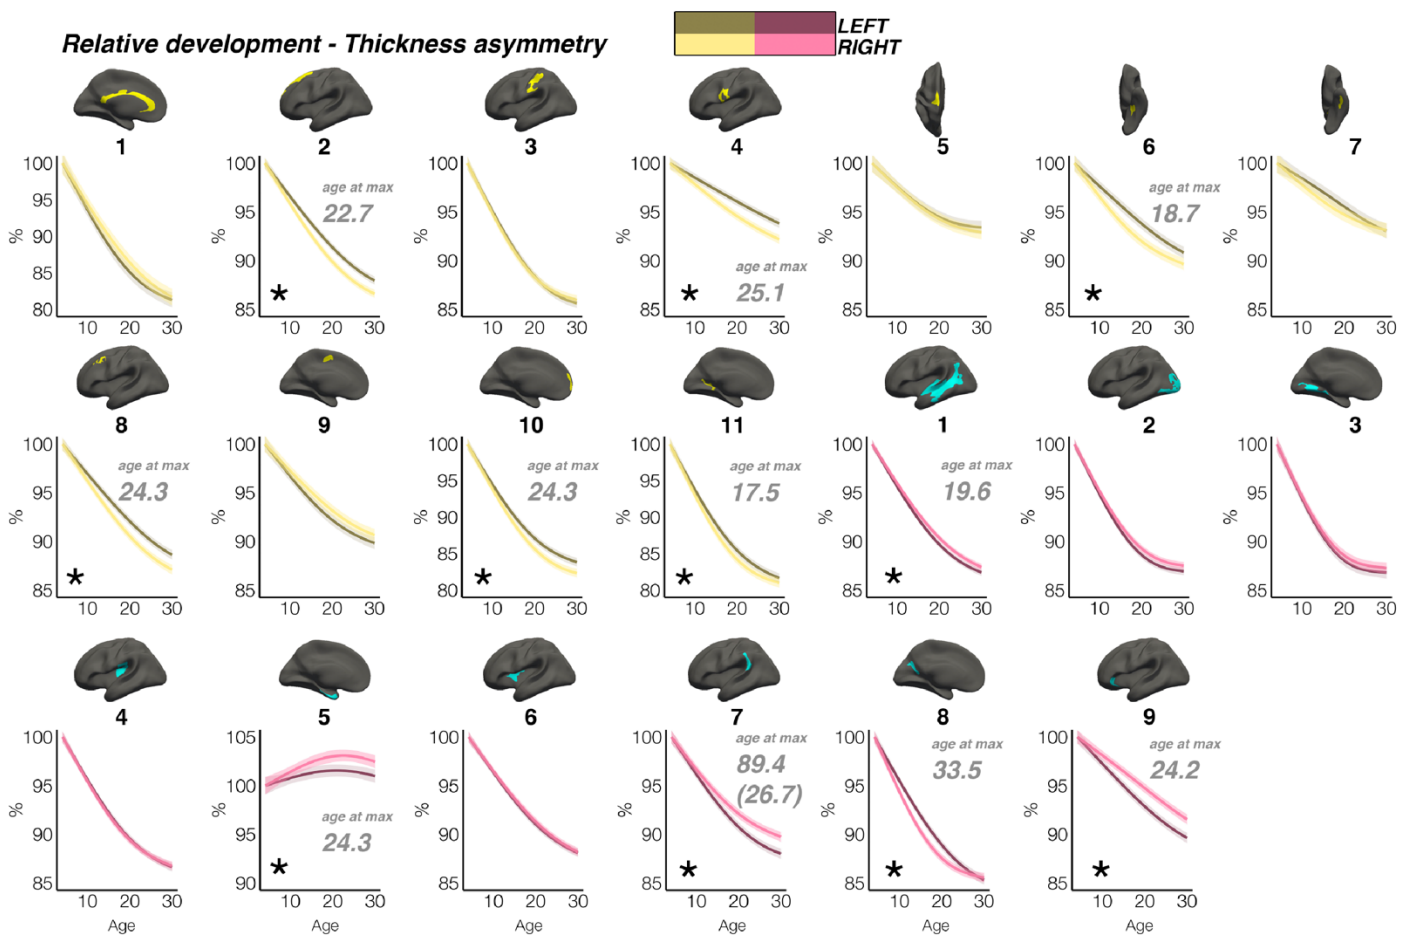

249  
250  
251 **Figure 4:** Relative developmental trajectories of homotopic cortical thickness in clusters exhibiting population-level  
252 thickness asymmetry. To highlight development, the x-axis covers the age-range 4-30 years, although relative change was  
253 calculated from full lifespan models (Methods). Darker trajectories indicate LH trajectories. Shaded areas indicate 95% CI.  
254 A relative difference in developmental thinning rates between hemispheres is suggested if the CI's of relative LH and RH  
255 trajectories diverge to be non-overlapping (denoted with \*). These indications should be interpreted in combination with  
256 the full lifespan GAMM trajectories shown in Figure 3. Where relative hemispheric differences are indicated, age at the  
257 point of maximum thickness asymmetry across life is denoted in grey (Methods). Since one cluster (R7) was estimated to  
258 exhibit maximum thickness asymmetry at age 89.4 (see Figure 3), age at maximum asymmetry for the developmental peak  
259 is also given in parentheses (Figure 3).

260  
261  
262 **2.3 Interregional asymmetry correlations**  
263 We then investigated whether cortical asymmetry correlates within individuals (AI's corrected for age, sex, scanner;  
264 Methods). For areal asymmetry, a common covariance structure between asymmetries was detectable across datasets:  
265 Mantel tests revealed the correlation matrices derived independently in LCBC, UKB and HCP data all correlated almost  
266 perfectly ( $r \geq 0.97$ , all  $p < 9.9 \times 10^{-5}$ ; Figure 5A; Figure 5-figure supplement 1A). The highest correlations (or "hotspots") all  
267 reflected positive correlations between regions that are on average left-asymmetric and regions that are on average right-  
268 asymmetric (i.e. higher leftward asymmetry in one region related to higher rightward asymmetry in another; Figure 5A  
269 black outline); leftward asymmetry in SMG/perisylvian (#1L) was related to higher rightward asymmetry in inferior parietal  
270 cortex (#2R;  $r = .48$  [LCBC]), leftward anterior cingulate asymmetry (ACC; #3L) was related to higher rightward  
271 asymmetry in mPFC (#6R,  $r = .47$ ), and leftward asymmetry in a superior frontal cluster (#7L) was related to rightward  
272 asymmetry in the cingulate (#3R,  $r = .68$ ). None of the relationships could be explained by brain size, as additionally  
273 removing the effect of intracranial volume (ICV) from cluster AI's had a negligible effect on their interrelations (max  
274 correlation change = 0.008). Post-hoc tests confirmed that opposite-direction asymmetries were more correlated if closer  
275 in cortex (Methods); geodesic distance was lower between cluster-pairs that were more correlated ( $\rho = -.35$ ,  $p = .01$   
276 [LCBC];  $-.38$ ,  $p = .007$  [UKB; Figure 5C];  $-.34$ ,  $p = .02$  [HCP]), though this was driven by the aforementioned "hotspots".  
277 By contrast, same-direction areal asymmetries were not more correlated if closer in cortex (leftward [all  $p > .5$ ]; rightward  
278 [all  $p > .5$ ]). This suggests specific areal asymmetries that are closer in cortex and opposite in direction may show  
279 coordinated development.  
280



281 For thickness asymmetry, the correlation matrix exhibited a clear pattern in UKB that was less visible but still apparent  
 282 in LCBC and HCP (Figure 5B; Figure 5-figure supplement 1B). Mantel tests confirmed that the covariance structure  
 283 replicated between all dataset-pairs (LCBC-UKB  $r = .49, p = .007$ ; LCBC-HCP  $r = .62, p < 2.9^{-4}$ ; UKB-HCP  $r = .46, p =$   
 284  $.009$ ). The observed pattern suggested higher leftward asymmetry in regions that are on average left-asymmetric was  
 285 associated with less rightward asymmetry in regions that are on average right-asymmetric. However, given that the AI  
 286 measure is bidirectional, closer inspection of the correlations revealed that higher leftward asymmetry in regions that are  
 287 left-asymmetric actually corresponded to more *leftward* asymmetry in right-asymmetric regions, and vice versa (and on  
 288 average; see Figure 5-figure supplement 2). In other words, individuals may tend towards either leftward lateralization  
 289 or rightward lateralization (or symmetry) on average, irrespective of the region-specific direction of mean thickness  
 290 asymmetry in the cluster. Similarly, asymmetry in left-asymmetric regions was mostly positively correlated, and  
 291 asymmetry in right-asymmetric regions was mostly positively correlated. Again, additionally removing ICV-associated  
 292 variance had negligible effect (max correlation change = 0.004). Post-hoc principal components analysis (PCA) in UKB  
 293 revealed PC1 explained 21.9% of the variance in thickness asymmetry and suggested a single component may be  
 294 evident for thickness asymmetry (Figure 5D). Accordingly, we found a correlation of  $r = -.61$  between mean asymmetry  
 295 across all leftward vs. mean asymmetry across all rightward clusters in UKB ( $p < 2.2^{-16}$  [means weighted by cluster size]; see Figure  
 296 4D;  $r = -.56, p < 2.2^{-16}$  [unweighted means];  $r = .66, p < 2.2^{-16}$  [PC1 across all leftward vs. PC1 across all rightward]). Though less strong, all  
 297 relationships were significant in LCBC ( $r = -.12; p = 7.4^{-11}$  [weighted];  $r = -.05; p = .005$  [unweighted];  $r = .19; p < 2.2^{-16}$  [PC1 vs. PC1])  
 298 and significant or trend-level in HCP ( $r = -.11; p = 1.6^{-4}$  [weighted];  $r = -.04; p = .15$  [unweighted];  $r = .12, p = 3.33^{-5}$  [PC1 vs. PC1]; see  
 299 Figure 5-figure supplement 3). These results suggest thickness asymmetry may be globally interrelated across the cortex  
 300 and show high directional variability in the adult population.

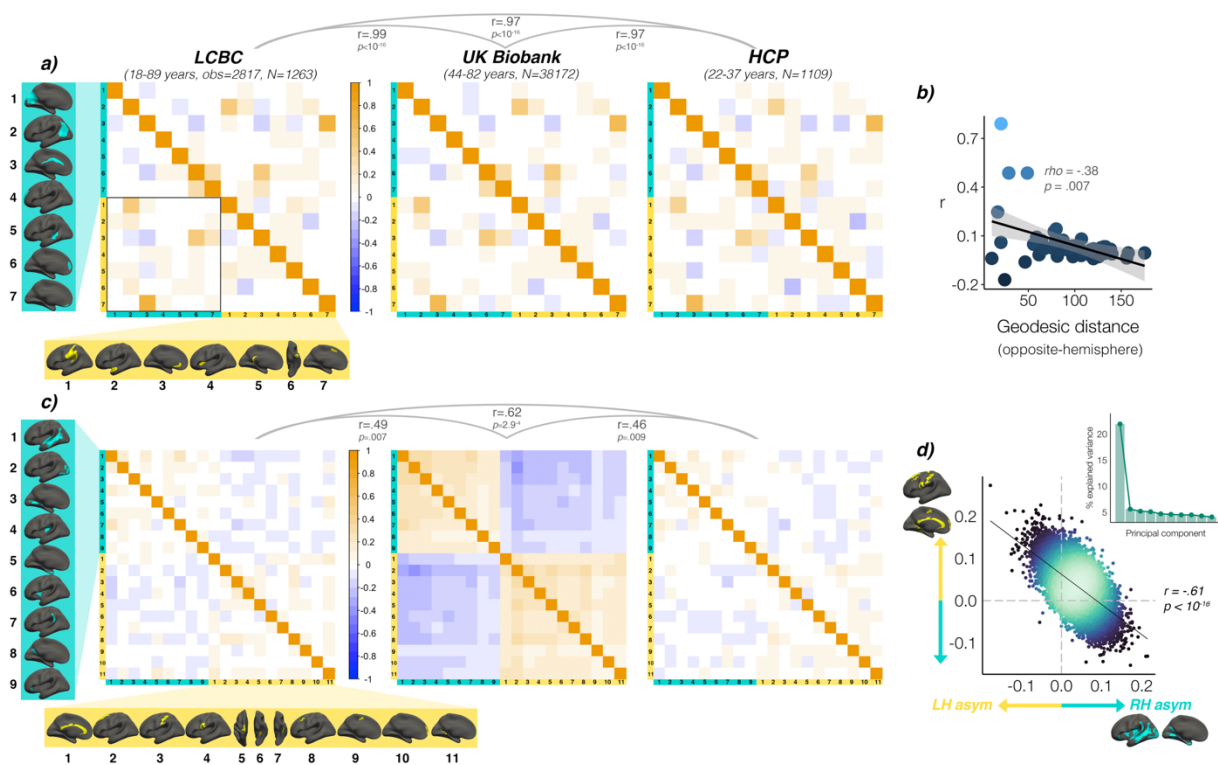

301  
 302  
 303 **Figure 5:** Interregional correlations between **A)** areal asymmetries and **B)** thickness asymmetries for each replication  
 304 dataset (AI's residualized for age, sex, scanner). AI's in rightward clusters are inverted, such that positive correlations  
 305 denote positive asymmetry-asymmetry relationships, regardless of direction of mean asymmetry in the cluster (i.e. higher  
 306 asymmetry in the population-direction). Yellow and blue brain clusters/colours denote leftward and rightward  
 307 asymmetries, respectively (clusters numbered for reference). A consistent covariance structure was evident both for  
 308 areal ( $r \geq .49$ ) and thickness asymmetry ( $r \geq .49$ ; results above matrices). Black box in A highlights relationships  
 309 between opposite-direction asymmetries (i.e. leftward vs rightward regions). **C)** For areal asymmetry, asymmetry in  
 310 opposite-direction cluster-pairs that were closer in cortex were more positively correlated (datapoints show cluster-pairs).  
 311 **D)** A single component explained 21.9% variance in thickness asymmetry in UKB (inset plot). Accordingly, we found a  
 312 correlation of  $r = -.61$  ( $p < 10^{-16}$ ) in UKB between mean asymmetry across leftward clusters (Y-axis) vs. mean asymmetry  
 313 across rightward clusters (X-axis; AI's in rightward clusters inverted). Lines of symmetry (0) are in dotted grey (see also  
 314 Figure 4-figure supplements 1-3).

315  
 316  
 317  
 318

## 319 2.4 Heritability

320 Although heritability of the global measures for each hemisphere was high (area  $h^2_{\text{twin}} = 92\%$ ;  $h^2_{\text{SNP}} = 67\%$ ; thickness  
321  $h^2_{\text{twin}} = 81\%$ ;  $h^2_{\text{SNP}} \sim 36\%$ ), heritability of global asymmetry measures was substantially lower (area  $h^2_{\text{twin}} = 16\%$  [95% CI  
322 = 5 - 27%];  $h^2_{\text{SNP}} = 7\%$  [3 - 10%]; thickness  $h^2_{\text{twin}} = 16\%$  [5 - 27%];  $h^2_{\text{SNP}} \sim 1\%$  [0 - 5%]). All estimates for global measures  
323 were post-corrected significant ( $p < .008$ ; see [Supplementary file 1G](#)) except the SNP-based estimate for global thickness  
324 asymmetry in UKB ( $p = .22$ ). Of our robust asymmetry clusters, four areal asymmetries showed significant twin-based  
325 heritability in HCP (post-correction; leftward SMG/perisylvian and anterior insula, and rightward cingulate and STS), all  
326 of which were also significant in the SNP-based analyses ( $h^2_{\text{twin}}$  range = 19 - 27%;  $h^2_{\text{SNP}}$  range = 8 - 19%). Additionally,  
327 SNP-based analyses revealed 9/14 (64%) areal asymmetry clusters exhibited significant heritability (post-correction;  
328 [Supplementary file 1H](#)). Importantly, highest SNP-based heritability was observed for leftward areal asymmetry in the  
329 anterior insula cluster ( $h^2_{\text{SNP}} = 18.6\%$ ,  $p < 10^{-10}$ ; see [Supplementary file 1H](#)), which was substantially higher than the next  
330 highest estimates in SMG/perisylvian ( $h^2_{\text{SNP}} = 10.7\%$ ,  $p = 3.01^{-9}$ ), retrosplenial cortex, gyrus rectus and the cingulate (all  
331  $h^2_{\text{SNP}} = 8-10\%$ ). For thickness, two robust asymmetries survived correction in the twin-based analyses (rightward STS  
332 and lingual gyrus). Of these, only STS was also significant in the SNP-based analysis but did not survive correction.  
333 Moreover, only 3/20 (15%) thickness asymmetries exhibited significant SNP-based heritability ( $h^2_{\text{SNP}} = 3-7\%$ ). Cluster-  
334 wise heritability estimates were significantly lower for thickness asymmetry than for area using a SNP-based approach  
335 ( $\beta = -1.1$ ,  $p = .0008$ ; [Supplementary file 1I](#)) but not a twin-based approach ( $\beta = -.03$ ,  $p = .33$ ).  
336

337 We then estimated asymmetry heritability cortex-wide<sup>50</sup> ([Figure 6](#)). For areal asymmetry, 69 parcels survived FDR-  
338 correction in HCP, 84% (58) of which were also FDR-corrected significant in the SNP-based analysis. Moreover, a total  
339 of 267 (53%) parcels exhibited significant FDR-corrected SNP-based heritability for areal asymmetry in UKB data  
340 (significant  $p[FDR] < .05$  parcels in each sample are depicted with black outlines in [Figure 6A](#)). Beyond significance, a  
341 consistent heritability pattern for areal asymmetry was clearly evident using twin- and SNP-based data from independent  
342 samples, with higher heritability notably in anterior insula, SMG, Sylvian fissure, STS, calcarine sulcus, cingulate, medial  
343 and orbitofrontal cortex, and fusiform. This overlap was substantiated by a spatial correlation of  $r = .46$  between maps;  $p$   
344  $< 10^{-16}$ . Moreover, maximum SNP-heritability (cyan parcel in [Figure 6](#)) was observed in anterior insula (parcel  $h^2_{\text{SNP}} =$   
345  $16.4\%$ ;  $p < 10^{-10}$ ), confirming this region constitutes the most heritable cortical asymmetry in humans (and not improving  
346 on the cluster-wise estimate).  
347

348 For thickness asymmetry, 15 parcels survived FDR-correction in the twin-based analysis, 7 of which were also post-  
349 corrected significant in the SNP-based analysis. However, significant FDR-corrected SNP-heritability was observed in  
350 only 11% (57) of parcels, including around superior temporal gyrus, planum temporale, the posterior insula/Sylvian  
351 fissure, anterior insula, and in orbitofrontal cortex (max  $h^2_{\text{SNP}} = 16.6\%$ ), along the cingulate and in medial visual cortex.  
352 Beyond significance, we observed little obvious visual overlap in twin- and SNP-based heritability patterns (spatial  
353 correlation was significant but low;  $r = .24$ ;  $p = .01$ ), and higher estimates pertained to regions that were limited in extent  
354 but generally showed no clear global pattern common to both datasets, with the possible exception of calcarine and  
355 cingulate cortex. Furthermore, cortex-wide heritability estimates were significantly lower for thickness asymmetry than  
356 for area using both a SNP-based ( $\beta = -0.71$ ,  $p < 2^{-16}$ ) and twin-based approach ( $\beta = -.33$ ,  $p = 1.08^{-7}$ ).  
357

358 For areal asymmetry, large genetic correlations explained several phenotypic correlations evident in [Figure 5A](#) ([Figure](#)  
359 [6C](#)): high genetic correlations were found between leftward asymmetry in SMG/perisylvian and higher rightward  
360 asymmetry in lateral parietal cortex (LPC;  $r_G = .83$ ;  $p[FDR] = 6.58^{-5}$ ), between leftward superior frontal cortex asymmetry  
361 and rightward asymmetry along the cingulate ( $r_G = .82$ ;  $p[FDR] = 1.15^{-2}$ ), and between leftward anterior  
362 temporal/parahippocampal asymmetry and rightward asymmetry in LPC ( $r_G = .68$ ;  $p[FDR] = 1.16e^{-2}$ ). Genetic correlations  
363 between anterior insula and two rightward superior frontal clusters were also observed ( $r_G = .86$ ;  $p[FDR] = 1.21^{-6}$ ;  $r_G =$   
364  $0.42$ ;  $p[FDR] = 6.64^{-4}$ ) in the absence of phenotypic correlations ([Figure 5](#)), and several same-direction asymmetries  
365 showed moderate genetic correlation. In contrast, only one post-corrected significant genetic correlation was observed  
366 for thickness asymmetry (see [Figure 6C](#);  $r_G = 0.68$ ;  $p[FDR] = 2.97^{-2}$ ).  
367

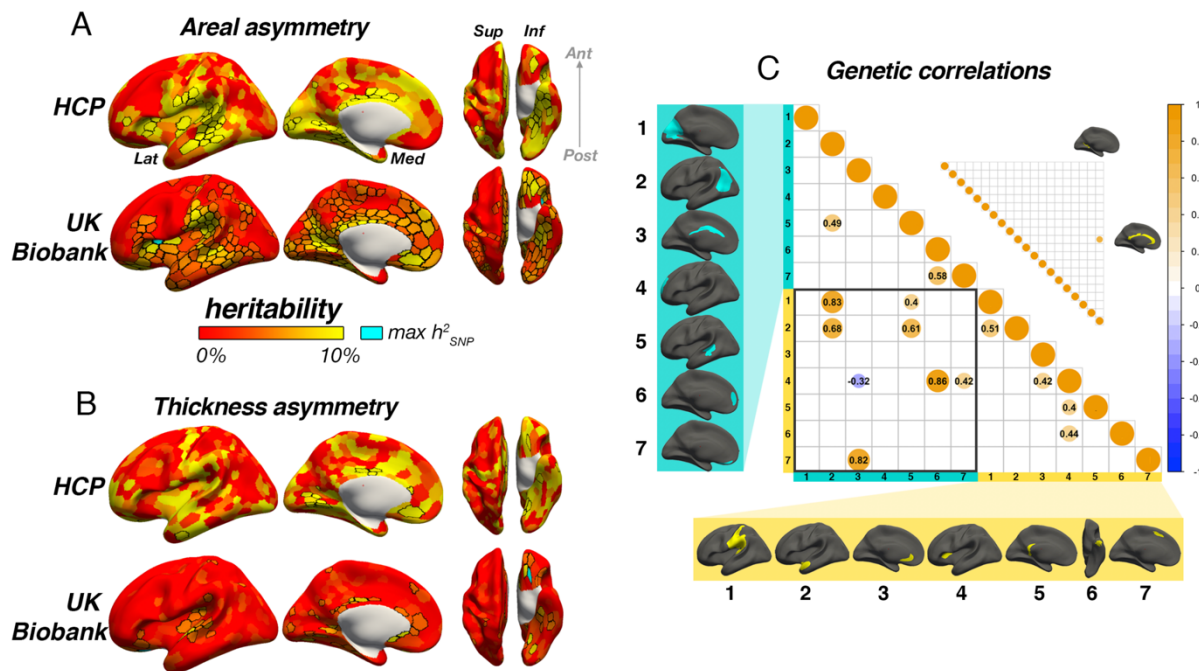

368  
369 **Figure 6.** Heritability of areal (A) and thickness asymmetry (B) estimated cortex-wide using twin-based (HCP data; top  
370 row) and SNP-based methods (UKB data; bottom row). Unthresholded effect maps are shown. Parcels in black outline  
371 show significance at  $p[FDR] < .05$ . Cyan parcels depict the point of maximum observed SNP-heritability (area  $h^2 = 16.4\%$ ;  
372 thickness  $h^2 = 16.6\%$ ). C) SNP-based genetic correlations between areal (lower matrix) and thickness asymmetries  
373 (upper matrix). For area, genetic correlations explained several phenotypic correlations (Figure 5A). For thickness, one  
374 pair survived FDR-correction (shown). AI's in rightward clusters are inverted such that positive genetic correlations  
375 denote asymmetry-asymmetry genetic relationships, regardless of direction of mean asymmetry in the cluster (i.e. higher  
376 asymmetry in the population-direction). Yellow and blue brain clusters/colours denote leftward and rightward  
377 asymmetries, respectively (clusters numbered for reference).

378  
379  
380 **2.5 Associations with Cognition, Handedness, Sex, and ICV**

381 Finally, several significant associations were observed between factors-of-interest and asymmetry in our clusters (Figure  
382 7; Supplementary file 1J-K). Notably, all effect sizes were small. For general cognitive ability, we found one association,  
383 wherein higher areal asymmetry in the largest leftward cluster (SMG/perisylvian) was significantly associated with better  
384 cognition ( $\beta = .03$  [CI = 0.02 – 0.04],  $p = 7.4 \cdot 10^{-7}$ , Figure 7C). Although small, we note this association was far from only just  
385 surviving correction at our predefined alpha level ( $\alpha = .01$ ; Methods). This was checked in the substantially reduced non-  
386 imputed subset of data with no missing cognitive variables and retained the lowest  $p$ -value ( $N = 4696$ ;  $\beta = 0.04$  [CI = 0.01  
387 - 0.07];  $p = 6.9 \cdot 10^{-3}$ ). We also post-hoc tested areal asymmetry associations with the 11 separate cognitive tests (Figure 7–  
388 figure supplement 1). For handedness, reduced leftward areal asymmetry in anterior insula and thickness asymmetry  
389 along postcentral gyrus was evident in left-handers, in line with our recent vertex-wise mapping in UKB<sup>22</sup>. For sex effects,  
390 which were also small, males typically exhibited slightly stronger areal asymmetry in large clusters (e.g. leftward  
391 SMG/perisylvian and temporal pole; rightward inferior parietal and superior frontal) but reduced leftward and rightward  
392 asymmetry in mPFC. For thickness, males exhibited more rightward asymmetry in STS and posterior insula, more  
393 leftward thickness asymmetry in superior frontal cortex, but reduced rightward thickness asymmetry in entorhinal cortex  
394 and anterior insula, and reduced leftward asymmetry in caudal superior frontal cortex. As ICV effects were typically most  
395 nominal, these are shown in Figure 7–figure supplement 2. Of note, none of the reported associations changed  
396 appreciably when controlling for additional brain-size related covariates<sup>28</sup> (Supplementary file 1J-K).  
397

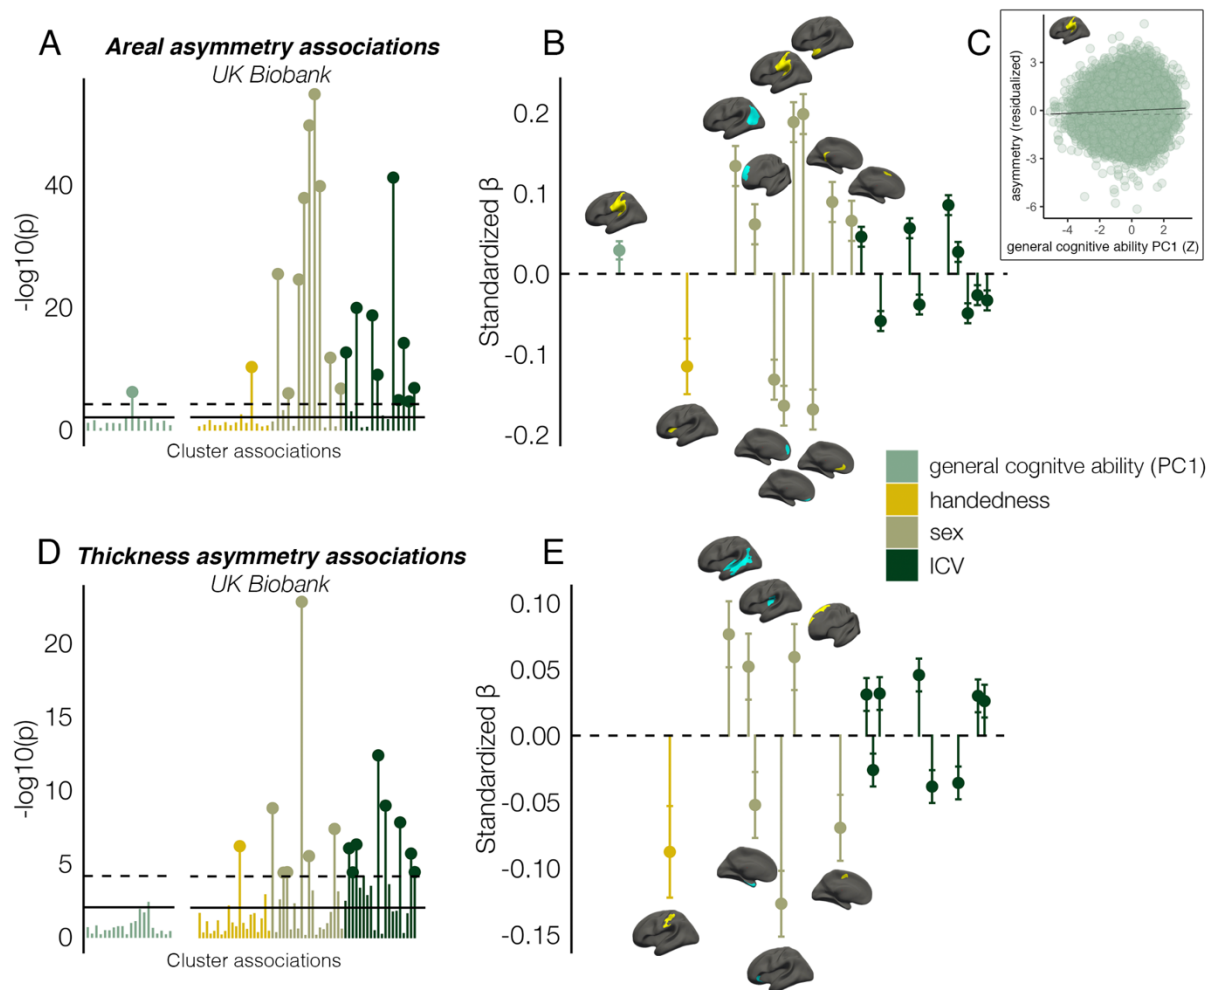

398  
 399  
 400 **Figure 7.** Associations with General cognitive ability (first principal component), Handedness, Sex, and Intracranial  
 401 volume (ICV) in UKB, in clusters exhibiting population-level areal (upper) and thickness asymmetry (lower). **A, D)**  
 402 Significance of associations (negative logarithm; corrected [ $p < 7.3e^{-5}$ ] and uncorrected threshold [ $p = .01$ ] shown by  
 403 dotted and non-dotted line, respectively). X-axis displays the test for each cluster-association. As maximum sample size  
 404 was used to test each association, effects on general cognitive ability were tested in separate models with fewer  
 405 observations ( $N = 35,199$ ; separated association plots) than Handedness, Sex and ICV ( $N=37,570$ ). **C)** Visualization of  
 406 the found association between leftward areal asymmetry in the large supramarginal cluster upon general cognitive ability  
 407 (PC1 across 11 cognitive tests). The line of null association is shown for comparison (dotted) **B, E)** Right plots denote  
 408 effect sizes, 95% confidence intervals (error bars) and cortical location of associations surpassing Bonferroni-corrected  
 409 significance. Als in rightward clusters were inverted. Right handers and females are coded 0, such that a negative effect  
 410 for general cognitive ability / handedness / sex / ICV / denotes less asymmetry in higher cognition / left handers / males  
 411 / larger brains. Associations with ICV are shown in [Figure 7-figure supplement 2](#). Yellow and blue clusters denote leftward  
 412 and rightward asymmetries, respectively.

### 413 414 415 416 **3. Discussion**

417 Combining the strengths of a vertex-wise delineation of population-level cortical asymmetry in 7 international datasets  
 418 and dense longitudinal data, we offer the first description of the longitudinal developmental and lifespan trajectories of  
 419 cortical asymmetry, advancing knowledge on normal human brain development. We show areal asymmetry is  
 420 predominantly stable across life, whereas we trace developmental growth in many thickness asymmetries signifying  
 421 differentiation of thickness asymmetry from early childhood to the mid-20s. We further demonstrate the replicable  
 422 interregional relationships between asymmetries within individuals, provide the most detailed heritability maps for cortical  
 423 asymmetry to date, and uncover novel and confirm previously-reported associations with factors purportedly important  
 424 in the context of asymmetry – all with small effects. All maps are available at [neurovault.org/XXXX](https://neurovault.org/XXXX).

425  
 426 **3.1. Population-level asymmetry**  
 427 Our vertex-wise analysis of cortical asymmetries that reproduce across adult cohorts replicates and completes a recent  
 428 low-resolution meta-analysis <sup>7</sup>, and can serve as a high-fidelity phenotype for future brain asymmetry studies. The marked

429 consistency across samples here suggests consensus may now be reached regarding cortical asymmetry phenotypes  
430 in humans, as our results agree with most reported results for areal asymmetry <sup>7,8,11,21,31</sup>, as well as several, typically  
431 more recent reports for thickness asymmetry <sup>7,17-19</sup>. Indeed, for thickness asymmetry – for which findings have been  
432 particularly mixed <sup>7,8,18-20,10-17</sup> – the left-right patterning here is compatible with low-resolution meta-analyses <sup>7</sup>,  
433 asymmetries evident in the first months of life <sup>19</sup>, a large-scale mapping in mid-old age <sup>22</sup>, reports using alternative  
434 analysis streams <sup>17,19</sup>, and possibly the overall pattern of brain torque <sup>7,51</sup> – a gross hemispheric twist leading to frontal  
435 and occipital bending at the poles <sup>52</sup>. The high overlap in effects between 7 datasets from 4 countries here suggests  
436 these results likely apply universally. This evident consensus suggests genetic-developmental programs regulate mean  
437 brain lateralization with respect to both area and thickness in humans. However, the genetic findings presented herein  
438 suggest these may have reached population fixation, as heritability of even our optimally delineated asymmetry measures  
439 was generally low. This indicates either subject-specific stochastic mechanisms in early neurodevelopment or later  
440 developmental influences primarily determine cortical asymmetry. Tracing their lifespan development, we show the  
441 lifespan trajectories of areal asymmetry primarily suggest this form of cerebral asymmetry is developmentally stable at  
442 least from age ~4, maintained throughout life, and formed early on – possibly *in utero* <sup>27,31</sup>. One interpretation of lifespan  
443 stability combined with low heritability may be stochastic early life developmental influences determine interindividual  
444 differences in areal asymmetry more than later developmental change. However, future work linking prenatal and  
445 childhood trajectories is needed to affirm this. Still, we also found relatively stronger heritability and reproducible  
446 heritability maps for areal asymmetry (notably, anterior insula exhibited ~19% SNP-based heritability). This also illustrates  
447 region-dependent interindividual genetic effects upon areal asymmetry, and the fact that phenotypic correlations were  
448 underpinned by high genetic correlations suggests specific areal asymmetries are formed under common genetic  
449 influence. In contrast, our findings of childhood development of thickness asymmetry until a peak around age ~24 <sup>18</sup>,  
450 higher directional variability in adult samples, and lower heritability, converge to suggest thickness asymmetry may be  
451 more shaped through subject-specific effects in later childhood development, possibly as the brain grows in interaction  
452 with the environment. This interpretation applied to asymmetry agrees with work suggesting cortical area in general may  
453 trace more to early life factors <sup>53-55</sup> whereas thickness may be more related to and impacted by lifespan influences <sup>54,56</sup>.

454  
455 **3.2. Lifespan trajectories**  
456 Our longitudinal description of cortical asymmetry lifespan trajectories gleaned novel insight into normal brain maturation  
457 and development. For areal asymmetry, adult-like patterns of lateralization were strongly established already before ~4  
458 years, indicating areal asymmetry traces back further and does not primarily emerge through later cortical expansion <sup>57</sup>.  
459 Rather, the lifespan trajectories predominantly show stability from childhood to old age, as areal asymmetry was generally  
460 maintained through periods of developmental expansion and aging-associated change that were region-specific and  
461 bilateral. This agrees with evidence indicating areal asymmetry may be primarily determined *in utero* <sup>31</sup>, and indirect  
462 evidence suggesting little change in areal asymmetry from birth to 2 years despite rapid and concurrent cortical expansion  
463 <sup>31,32,57</sup>. It may also fit with the principle that the primary microstructural basis of cortical area <sup>55</sup> – the number of and  
464 spacing between cortical minicolumns – is determined in prenatal life <sup>55,56</sup>, and agree with evidence suggesting  
465 asymmetry at this microstructural level may underly hemispheric differences in surface area <sup>58</sup>. The developmental  
466 trajectories agree with studies indicating areal asymmetry is established and strongly directional early in life <sup>30,31</sup>. That  
467 anatomical change in later development specifically in surface area follows embryonic gene expression gradients may  
468 also agree with a prenatal account for areal asymmetry <sup>56</sup>. Our results may therefore constrain the extent to which areal  
469 asymmetry can be viewed as a plastic feature of brain organization, and may even suggest areal asymmetry may  
470 sometimes be a marker for innate hemispheric specializations shared by most humans. Although future research is  
471 needed to characterize asymmetry structure-function relationships, the high degree of precision with which a large  
472 leftward areal asymmetry follows the contours of auditory-related regions in the Sylvian fissure ([Figure 1–figure](#)  
473 [supplement 1](#)) which show left functional lateralization in humans may be one example <sup>58-60</sup>; we found ~94% of individuals  
474 exhibited leftward areal asymmetry here – the most consistently lateralized cortical region in humans ([Figure 1F](#)).

475  
476 In stark contrast, although weak thickness asymmetry was evident by age 4, we observed considerable childhood  
477 developmental growth in many regional thickness asymmetries. Developmental trajectories showed non-linear  
478 asymmetry growth by virtue of accelerated thinning of the non-dominant hemisphere (10/20 clusters showed a relative  
479 hemispheric difference in the rate of developmental thinning; [Figure 4](#)). This led to maximally established asymmetry  
480 around ~24 years of age. These trajectories clearly suggest differentiation of the cortex is occurring with respect to  
481 thickness asymmetry in development, possibly (though not necessarily) suggesting thickness asymmetry may be more  
482 amenable to experience-dependent change. Indeed, as cortical thinning in childhood is thought to partly reflect likely  
483 learning-dependent processes such as intracortical myelination <sup>61</sup> and possibly pruning of initially overproduced  
484 synapses <sup>62,63</sup> and neuropil reduction, thickness asymmetry growth may suggest hemispheric differences in the  
485 developmental optimization of cortical networks at least partly shaped by childhood experience. This raises the possibility  
486 thickness asymmetry may be a marker of ontogenetic hemispheric specialization within neurocognitive networks, and  
487 may also fit with animal models suggesting lateralized training can alter hemispheric imbalance of cortical thickness <sup>64</sup>.  
488 However, this interpretation is speculative, and our results could be used to guide intervention-based approaches to  
489 experimentally test plasticity of thickness asymmetry in humans. Our lifespan results are often difficult to reconcile with  
490 earlier lifespan reports finding different mean thickness asymmetry patterns <sup>10,12,15</sup> and modelling asymmetry linearly  
491 across cross-sectional developmental and adult age-ranges <sup>10,15,17</sup>. However, our findings in development agree with  
492 work finding a similar left-right thickness asymmetry pattern shows rapid longitudinal asymmetry increase in the first  
493 years of life <sup>19</sup>, with especially rapid increase in mPFC <sup>19</sup>. As we observed rapid asymmetry differentiation that spanned  
494 across childhood and adolescence in most prefrontal regions and several others ([Figure 3](#); [Figure 4](#); [Figure 3–figure](#)  
495 [supplements 3 & 4](#)), we extend these earlier findings in neonates <sup>19</sup>. Likely, the combination of longitudinal data and

496 nonlinear modelling was critical to capture early developmental growth in thickness asymmetry within a lifespan  
497 perspective, because large interindividual variation in hemispheric thickness estimates at any age may hinder detection  
498 of subtle change effects even in large cross-sectional samples<sup>65</sup>, possibly rendering follow-up data all but essential in  
499 the context of cortical asymmetry change. As prefrontal thickness asymmetry seems particularly vulnerable in some  
500 neurodevelopmental disorders<sup>24</sup>, aging, and Alzheimer's disease<sup>18</sup>, these trajectories may provide a useful normative  
501 reference, for example regarding the timing of expected brain change in development. With regards to aging, most  
502 clusters delineated here did not exhibit the relative hemispheric difference in rates of cortical thinning we have previously  
503 shown is a feature of aging in heteromodal cortex<sup>18</sup>, except in clusters overlapping with our previous analysis (Figure 3–  
504 figure supplement 5). This agrees with our previous work showing aging-related loss in thickness asymmetry is specific  
505 to heteromodal cortical regions vulnerable in aging. In these regions, we also found strong evidence of early  
506 developmental growth in thickness asymmetry (Figure 3–figure supplement 4). Developmental differentiation and aging-  
507 related dedifferentiation of thickness asymmetry underscores its proposed role in supporting optimal brain organization  
508 and function, though it seems not all thickness asymmetries that grow in childhood development decline in aging.  
509

### 510 3.3. Interregional correlations

511 For areal asymmetry, we uncovered a covariance structure that almost perfectly replicated across datasets. In general,  
512 this fit with a multifaceted view<sup>29,34,35</sup>, in which most asymmetries were either not or only weakly correlated – but reliably  
513 so – contrasting views emphasizing a single biological<sup>37,38</sup> or overall anatomical factor<sup>66</sup> controlling cerebral  
514 lateralization. However, we also identified several regions wherein areal asymmetry reliably correlated within individuals,  
515 showing the variance in cortical asymmetries is not always dissociable, as often thought<sup>29,34,35</sup>. The strongest  
516 relationships all pertained to asymmetries that were proximal in cortex but opposite in direction. Several of these were  
517 underpinned by high asymmetry-asymmetry genetic correlations, illustrating cerebral lateralizations in surface area that  
518 are formed under common genetic influence, possibly in agreement with likely prenatal origins for areal asymmetry<sup>31,55</sup>.  
519

520 For thickness asymmetry, we also uncovered a common covariance structure – particularly clear in UKB – that  
521 nevertheless replicated with moderate precision across datasets (Figure 5C). Furthermore, a single component explained  
522 a relatively high proportion of variance in thickness asymmetry in UKB, and a high correlation across 38,172 individuals  
523 further suggested thickness asymmetry may be globally interrelated across the cortex (Figure 5D). These data for  
524 thickness indicate individuals may tend towards either leftward asymmetry, rightward asymmetry, or symmetry, both  
525 globally across the cortex and irrespective of the region-specific average direction of asymmetry (Figure 5–figure  
526 supplements 2-3). Though it is unclear why the relationships were weaker in the other datasets tested, we nevertheless  
527 found similarly significant relationships in each (Figure 5–figure supplement 3). This result seems in broad agreement  
528 with the notion that some lateralized genetic-developmental programs may trigger lateralization in either direction<sup>35</sup> or  
529 lose their directional bias through environmental interaction<sup>35</sup>. As thickness asymmetry seems established at but minimal  
530 from birth<sup>19</sup>, genetic effects may determine the average region-specific hemispheric bias in the population, but later  
531 developmental change may subsequently confer major increases upon its directional variance<sup>35</sup>. Overall, the evidence  
532 converges to suggest a high degree of developmental change may shape thickness asymmetry and lead to higher  
533 directional variability in the population. Thus, far from being independent phenotypes<sup>29,34</sup>, thickness asymmetries may  
534 be globally interrelated across the cortex and their direction coordinated through development.  
535

### 536 3.4. Genetic influences

537 For areal asymmetry, we found replicable patterns of low-moderate heritability across datasets and across twin and  
538 genomic methods. We also found areal asymmetry in the anterior insula is, to our knowledge, the most heritable brain or  
539 behavioural asymmetry yet reported with genomic methods<sup>22,27,67–69</sup>, with common SNPs explaining ~19% variance.  
540 This is a substantial improvement on our recent report of < 5%<sup>22</sup>, and illustrates a benefit of our data-driven population-  
541 mapping approach. As we reported recently<sup>22</sup>, we confirm asymmetry in this region associates with handedness.  
542 Furthermore, highest SNP and twin-based heritability for areal asymmetry was found in all regions that constitute the  
543 earliest emerging cortical asymmetries *in utero*<sup>70–73</sup>: anterior insula, STS, PT, medial occipital cortex, and  
544 parahippocampal gyrus (Figure 6A). However, observations of significant heritability were not restricted to these regions,  
545 as most areal asymmetries exhibited significant – albeit often lower – SNP-based heritability, as did most parcels when  
546 estimated cortex-wide, and significant SNP-based heritability was also evident in regions not found in the present  
547 analyses to show strong areal asymmetry, such as Broca's area (but see Figure 1–figure supplement 4). These effects  
548 agree with and elaborate on two genetic explorations using atlas-based methods<sup>7,27</sup> and reports of heritable areal  
549 asymmetry in handedness-associated clusters<sup>22</sup>. However, as noted above, although heritability of either hemisphere  
550 was high, areal asymmetry heritability was still only moderate at best, suggesting both genetics but primarily subject-  
551 specific stochastic effects likely underly its formation. By contrast, thickness asymmetry was generally not heritable, or  
552 showed low and localized heritability effects with no clear global pattern. We also observed more divergent results using  
553 twin and genomic methods for thickness, possibly due to low-power for twin-models, though we note the SNP-based  
554 effects we observed were somewhat in agreement with a previous twin study<sup>7</sup>.  
555

556 Considered together, lifespan stability possibly from birth<sup>31</sup>, less interindividual directional variability, higher heritability,  
557 and phenotypic and genetic correlations all converge to suggest comparatively higher genetic influence upon  
558 interindividual differences in areal asymmetry. This also agrees with work showing genetic variants associated with  
559 (mostly areal) asymmetry are primarily expressed in prenatal life<sup>27</sup>. By contrast, childhood developmental change, high  
560 interindividual directional variability and low heritability for thickness asymmetry converge to fit a scenario whereby  
561 thickness asymmetry may be more shaped through individual lifespan exposures<sup>56</sup>, or where its developmental direction  
562 may be triggered by random influences<sup>74</sup>. Whether region-specific thickness asymmetry change relates to the maturation

563 of lateralized brain functions <sup>74,75</sup> will be an important question for future research. Regardless, our results support a  
564 differentiation between early-life and later developmental factors in shaping areal and thickness asymmetry, respectively.  
565

### 566 3.5. Individual differences

567 Screening population-level asymmetries for association with general cognitive ability revealed one region –  
568 SMG/perisylvian – wherein higher leftward areal asymmetry related to higher cognition. Interestingly, this cluster was  
569 consistently the most lateralized across individuals, with ~94% directional concordance (Figure 1G), suggesting highly  
570 regulated genetic-developmental programs shape its laterality in humans. Asymmetry here is likely related to brain  
571 torque, which leads to interhemispheric anatomical differences especially around the Sylvian fissure <sup>52,76</sup>. This may  
572 therefore agree with recent work suggesting brain torque relates to cognitive outcomes <sup>77,78</sup>. However, as seems typical  
573 of brain associations in big data <sup>79</sup> and may be expected for any single structural measure explaining a complex  
574 phenomenon, the association was notably small. Also of note, no other asymmetry showed evidence of cognitive  
575 association (Figure 7–figure supplement 1), suggesting previously reported associations in small samples will likely not  
576 replicate <sup>17</sup>. That the association we find was specific to the most lateralized areal asymmetry in humans may suggest  
577 disruptions in early life cerebral lateralization lead to cognitive deficits – detectable in later life as small effects in big data.  
578 This may also agree with work suggesting differences in general cognitive ability relate primarily to areal phenotypes <sup>53,56</sup>  
579 formed early in life <sup>55</sup>.

580  
581 Consistent with our recent vertex-wise analysis in UKB <sup>22</sup>, we confirmed leftward areal asymmetry of anterior insula, and  
582 leftward somatosensory thickness asymmetry is subtly reduced in left handers. Sha et al. <sup>22</sup> reported shared genetic  
583 influences upon handedness and cortical asymmetry in anterior insula and other more focal regions not identified here.  
584 Anterior insula lies within a left-lateralized functional language network <sup>80</sup>, and its structural asymmetry may relate to  
585 language lateralization <sup>42,81,82</sup> in which left-handers show increased incidence of atypicality <sup>48,83,84</sup>. Since asymmetry here  
586 emerges early *in utero* <sup>70</sup> and is by far the most heritable (see above), we agree with others <sup>42</sup> that future research will  
587 find this ontogenetically foundational region of cortex <sup>85,86</sup> fruitful in understanding genetic-developmental mechanisms  
588 influencing laterality. Leftward thickness asymmetry reduction in somatosensory cortex in left handers also echoes our  
589 recent report <sup>22</sup>, and may also fit a scenario whereby thickness asymmetries are partly shaped through use-dependent  
590 plasticity, possibly carrying information regarding group-level hemispheric specializations of function. However, the small  
591 effects highlight that cortical asymmetry cannot predict individual hand preference. Similarly, asymmetry-relationships  
592 with other factors typically assumed important were all small – despite our optimization of asymmetry phenotypes – and  
593 mostly compatible with those reported in the ENIGMA meta-analysis <sup>7</sup> and elsewhere <sup>28,41</sup>. Concerning sex effects –  
594 which were small, differing in direction, and more predictive than ICV <sup>41</sup> – inconsistencies evident between ours and  
595 ENIGMA include findings of increased (here) and decreased <sup>7</sup> lateral parietal areal asymmetry in males, and increased  
596 <sup>7</sup> and decreased (here) entorhinal thickness asymmetry in males, and our approach detected other regions slightly more  
597 asymmetric in males (e.g. STS). Possibly, differences in sample median age (here UKB = ~64; Kong et al. = 26 <sup>7</sup>) and  
598 potential sex-differences in age decline trajectories <sup>87</sup> may underlie some inconsistencies, maybe more so for thickness  
599 measures in structures vulnerable to age-related degeneration <sup>22</sup>.

### 600 3.6. Limitations

601 Several limitations should be mentioned. First, our delineation of population-level asymmetry used a single analysis  
602 software. As with most current papers we used FreeSurfer's default 'recon-all' function to delineate the cortex, which has  
603 been extensively validated against postmortem measurements <sup>88</sup> and is the software underlying most large-scale studies  
604 involving brain measures. It is currently unclear to what extent differences in pipelines account for previous mixed results  
605 <sup>7,8,18–20,10–17</sup>. Although we highlight there are clear commonalities between our results and studies using alternative  
606 pipelines <sup>17,19,20</sup>, which may suggest our results generalize across analysis systems <sup>17,19–21</sup>, we found one instance where  
607 the MRI pipeline leads to different results for thickness asymmetry (Figure 1–figure supplement 4). It is not known what  
608 underlies this difference, though we find it is unrelated to the cross-hemispheric registration methods employed here, as  
609 our results reproduce using standard parcellation methods and thus are likely evident in most FreeSurfer-derived  
610 datasets (Figure 1–figure supplement 5). One possibility could be that thickness asymmetry may not reflect cortical  
611 thickness differences per se, but rather reflect biologically meaningful hemispheric differences in intracortical myelination  
612 levels that are consistently picked up on via FreeSurfer's standard delineation procedure. That the thickness asymmetry  
613 pattern we observe shows a clear developmental trajectory also suggests it is a true biological effect (Figure 3; Figure 4;  
614 Figure 3–figure supplements 1–4). Conceivable sources of inconsistently reported results for cortical asymmetries likely  
615 include varying age-distributions (particularly for thickness) <sup>18</sup>, and multiple asymmetries within atlas-based parcels (e.g.  
616 we observed notably discrepant results to ENIGMA for insula thickness asymmetry <sup>7</sup>). Still, this does not explain other  
617 discrepant reports, such as areal asymmetry of STS, which was rightward in all samples here (Figure 1–figure  
618 supplement 2; cf. <sup>7,29,30</sup>). Thickness asymmetries seem also more variable compared with area <sup>7</sup>, though it should be  
619 noted thickness in general may be slightly less reliable <sup>89</sup>, the asymmetry effect is smaller, and thus possibly contains  
620 more error. Relatedly, while the reported areal and thickness asymmetry patterns and strengths using cross-hemispheric  
621 methods agree with standard analysis (Figure 1–figure supplement 5), the magnitude of some asymmetries near the  
622 boundary of the subcortex may be exaggerated via this approach <sup>22</sup>. And although we did not find (strong) areal  
623 asymmetry in inferior frontal regions as reported by Kong et al <sup>7</sup>, both the unthresholded significance maps and standard  
624 parcellation analyses were compatible with this (Figure 1–figure supplement 2 & 5), highlighting a limitation of our chosen  
625 method. Second, while GAMMs are considered an optimal modelling technique for longitudinal lifespan data and are  
626 robust to nonuniform age distributions <sup>90</sup>, relative underrepresentation of the mid-adulthood age-range may drive  
627 trajectory inflection points around this age <sup>18</sup>, suggesting caution is warranted regarding interpreting mid-life inflection  
628 points as reflecting real change. Relatedly, as individual-level mean estimates likely contain more measurement error  
629

630 when extracted from smaller clusters, the lifespan trajectories from smaller clusters may be more variable, complicated,  
631 and prone to deflection by density differences along the age distribution. As can be seen in [Figures 3-4](#), spatially  
632 averaging across asymmetries helps smooth out some of this noise to better reveal developmental principles underlying  
633 structural asymmetries, but also trades off with accuracy, since the trajectories from distinct regions do somewhat differ.  
634 Third, though the differing heritability methods enabled a replication test, important differences between methods should  
635 be considered when interpreting heritability estimates, and may partly explain the common observation of higher  
636 estimates from twin methods, which we also observed. For example, twin methods implicitly incorporate additive genetic  
637 effects and gene-gene interactions amongst other terms, whereas SNP-based heritability incorporates only additive  
638 genetic effects. Still, twin methods may in some cases be prone to overestimating heritability due to unmet assumptions,  
639 particularly where the shared environment is thought to play a role <sup>91</sup>, whereas SNP-based methods may not capture all  
640 phenotype-relevant genetic variance and have their own assumptions <sup>92</sup>. We also observed that twin-based estimates  
641 were often substantially higher also where non-significant, which may suggest low power to detect the effects in question  
642 in HCP family data, or may agree with calls that caution against overinterpreting twin-based estimates <sup>91</sup>. Adding to this  
643 complexity, the samples used for twin- and SNP-based estimation consist of young adults and older adults, respectively.  
644 Hence, it is possible low SNP-based estimates for thickness asymmetry in UKB may be partly due to reduced mean  
645 thickness asymmetry in older adults <sup>18,28</sup>. However, as cortex-wide twin-based estimates for thickness asymmetry were  
646 also significantly lower than for areal asymmetry in the young HCP sample, this suggests age is likely not the main driver  
647 behind this difference, but a confound that further hinders comparison of results between methods. Again, we also cannot  
648 rule out that potential reliability differences between thickness and areal asymmetry may partially explain some  
649 magnitude differences in heritability estimates. Further, genetic correlations can be high even where heritability of either  
650 trait is low, and are typically higher than phenotypic correlations – known phenomena also observed here <sup>93,94</sup>. It may  
651 therefore be prudent to not overinterpret their magnitudes, though we emphasize their veracity seems well-supported,  
652 as one would expect true genetic correlations between developmentally-related and similar traits (here, sampled from  
653 nearby in the same organ), and to track the phenotypic correlations – both of which we also observed here – indicative  
654 of synchronized development of areal asymmetries through common genetic causes. Fourth, we imposed a necessary  
655 cluster size limit for overlapping asymmetry effects across samples, and thus more focal asymmetries may also be  
656 informative in relation to the factors tested here <sup>22</sup>. Fifth, as only dichotomous handedness self-reports are available with  
657 UKB, future studies might benefit from incorporating more nuanced handedness assessments not currently available in  
658 data of this size. Relatedly, because UKB cognitive data is not exhaustive <sup>95</sup> (e.g. fluid IQ ranges from 1-13), we extracted  
659 the common variance across core tests to index general cognitive ability. This approach does not permit testing  
660 associations with well-operationalized or specific cognitive domains (for which UKB cognitive data may not be sufficient),  
661 and it remains to be seen whether cortical asymmetry may be informative in the context of specific forms of lateralized  
662 cognition <sup>96</sup>, or using absolute non-directional measures. However, the subtlety of the only effect on cognition we find  
663 here may suggest we might expect similarly weak effects, though not necessarily if brain and phenotypic measurement  
664 accuracy is jointly optimized <sup>97</sup>.

665 Overall, we track the development of population-level cerebral cortical asymmetries longitudinally across life and perform  
666 analyses to trace developmental principles underlying their formation. Developmental trajectories, interregional  
667 correlations and genetic analyses converge upon a differentiation between early-life and later-developmental factors  
668 underlying the formation of areal and thickness asymmetries, respectively. By revealing hitherto unknown principles of  
669 developmental stability and change underlying diverse aspects of cortical asymmetry, we here advance knowledge of  
670 normal human brain development.

671  
672  
673  
674

## 675 **4. Methods**

### 676 **4.1 Samples**

677 We used anatomical T1 -weighted (T1<sub>w</sub>) scans from 7 independent international MRI datasets originating from 4  
678 countries (see [Supplementary file 1A](#) for an overview of samples used for each analysis). Note that with the exception  
679 of vertex-wise analyses in UKB (see below), all analyses made use of all available observations from each sample  
680 meeting the stated age-range criteria for each analysis.

681

#### 682 **4.1.1 Reproducibility across samples: population-level asymmetry**

683 To delineate average adult patterns of whole-cortical areal and thickness asymmetry, we restricted the age-range of all  
684 samples used in the vertex-wise analyses to 18-55. **Dataset 1:** Here, the Center for Lifespan Changes in Brain and  
685 Cognition (LCBC) sample comprised 1572 mixed cross-sectional and longitudinal scans (N longitudinal = 812; timepoint  
686 range = 1-6) from 923 participants (mean age = 30.6 ± 9.6) collected across 2 scanners. Additionally, 125 individuals  
687 were double-scanned at the same timepoint on both scanners. **Dataset 2:** The Cambridge Centre for Ageing and  
688 Neuroscience (Cam-CAN) <sup>98</sup> sample comprised cross-sectional scans of 321 individuals (mean age = 38.7 ± 9.7) <sup>99</sup>.  
689 **Dataset 3:** The Dallas Lifespan Brain Study (DLBS) <sup>100</sup> sample comprised cross-sectional scans of 160 individuals (mean  
690 age = 37.5 ± 10.7). **Dataset 4:** The Southwest University Adult Lifespan Dataset (SALD) <sup>101</sup> sample comprised cross-  
691 sectional scans of 301 individuals (mean age = 33.7 ± 11.5). **Dataset 5:** The IXI sample comprised cross-sectional scans  
692 of 313 healthy individuals collected across 3 scanners (mean age = 36.8 ± 9.6; <http://brain-development.org/ixi-dataset>).  
693 **Dataset 6:** Here, the Human Connectome Project (HCP) 1200 <sup>102</sup> sample comprised 1111 scans (mean age = 28.8 ±  
694 3.7). **Dataset 7:** Here, the UKB sample consisted of 1000 randomly sampled cross-sectional scans (mean age = 52.1 ±  
695 1.9), restricted to be comparable in size to the other datasets in this analysis.

696



#### 697 **4.1.2 Lifespan trajectories**

698 Here, we used the full age-range of the longitudinal lifespan LCBC sample (4.1 - 89.4 years), 3937 cross-sectional and  
699 longitudinal scans (N longitudinal = 2762) from 1886 individuals (females = 1139; mean age = 36.8) collected across 4  
700 scanners (271 double-scans) <sup>65,103</sup>.

#### 702 **4.1.3 Interregional correlations**

703 Here, we used the three largest datasets: LCBC (N = 1263; N obs = 2817), UKB (N = 38,172), and HCP (N = 1109; two  
704 outliers removed; see 4.3.3), excluding the childhood age-range from the LCBC sample not covered in any other dataset.

#### 706 **4.1.4 Heritability and individual differences**

707 For twin heritability, we used HCP 1200 extended twin data (1037 scans from twins and non-twin siblings; age-range =  
708 22-37; mean age = 28.9 ± 3.7). The various kinships are described in [Supplementary file 1B](#). All included twin pairs were  
709 same-sex. For SNP-heritability, we used the UKB imaging sample with genome-wide data surpassing quality control (N  
710 = 31,433; see 4.3.4). For individual differences analyses, we used the UKB imaging sample with the maximum number  
711 of available observations for each variable-of-interest (see 4.3.5).

#### 713 **4.2. MRI preprocessing**

714 T1w anatomical images (see [Supplementary file 1C](#) for MRI acquisition parameters) were processed with FreeSurfer  
715 (v6.0.0) <sup>104</sup> and vertex-wise areal and thickness morphometry estimates were obtained for each MRI observation. As the  
716 LCBC sample also contained longitudinal observations, initial cross-sectional reconstructions in LCBC were  
717 subsequently ran through FreeSurfer's longitudinal pipeline. As HCP data was acquired at a higher voxel resolution  
718 (0.7mm isotropic), the T1w scans were processed with the --hires flag to recon-all <sup>105</sup>. Areal and thickness maps of the  
719 LH and RH of each participant in each dataset were resampled from the native cortical geometry to a symmetrical surface  
720 template ("LH\_sym") <sup>11,106</sup> based on cross-hemispheric registration <sup>107</sup>. This procedure achieves vertex-wise alignment  
721 of the data from each participant and homotopic hemisphere in a common analysis space, enabling a whole-cortical and  
722 data-driven analysis of cortical asymmetry. Areal values were resampled with an additional Jacobian correction to ensure  
723 preservation of the areal quantities <sup>108</sup>. We then applied an 8mm FWHM Gaussian kernel to surface-smooth the LH and  
724 RH data.

#### 726 **4.3 Data analysis**

727 All analyses were performed in FreeSurfer (v6.0) and R (v4.1.1).

#### 729 **4.3.1 Population-level asymmetry**

730 We assessed areal and thickness asymmetry vertex-wise using FreeSurfer's Linear Mixed Effects (LME) tool <sup>109</sup>.  
731 Asymmetry was delineated via the main effect of Hemisphere (controlling for Age, Age × Hemisphere, Sex, Scanner  
732 [where applicable], with a random subject term). For each sample and metric, we computed mean Asymmetry Index  
733 maps (AI; defined as (LH-RH) / ((LH+RH)/2)). Spatial overlap of AI maps across datasets was quantified by correlating  
734 the 1-dimensional surface data between every dataset pair (Pearson's r). Next, to delineate regions exhibiting robust  
735 areal and thickness asymmetry across datasets, we thresholded and binarized the AI maps by a given absolute effect  
736 size (areal = 5%; thickness = 1%; achieving p[FDR] < .001 in most datasets with FreeSurfer's 2-stage FDR-procedure  
737 <sup>109</sup>), and summed the binary maps. After removing the smallest clusters (<200 mm<sup>2</sup>), a set of robust clusters was defined  
738 as those exhibiting overlapping effects in 6 out of 7 samples. We then extracted area and thickness data in symmetrical  
739 space for each cluster, subject, and hemisphere, spatially averaging across vertices.

#### 741 **4.3.2 Lifespan trajectories**

742 Factor-smooth GAMMs ("gamma4" <sup>110</sup>) were used to fit a smooth Age trajectory per Hemisphere, and assess the smooth  
743 Age × Hemisphere interaction in our clusters. GAMMs incorporate both cross-sectional and longitudinal data to capture  
744 nonlinearity of the mean level trajectories across persons <sup>111</sup>. The linear predictor matrix of the GAMM was used to obtain  
745 asymmetry trajectories and their confidence intervals, computed as the difference between zero-centered (i.e.  
746 demeaned) hemispheric age-trajectories. We included Hemisphere as an additional fixed effect, sex and scanner as  
747 covariates-of-no-interest, and a random subject intercept. We did not consider sex differences in lifespan asymmetry  
748 change because our elected method was not well-suited to testing three-way interactions between nonlinear smooth  
749 terms. A low number of basis dimensions for each smoothing spline was chosen to guard against overfitting (knots = 6;  
750 see [Figure 3—figure supplement 1](#)). LCBC outliers falling > 6SD from the trajectory of either hemisphere were detected  
751 and removed on a region-wise basis ([Supplementary file 1E-F](#)). To calculate relative change, we refitted lifespan GAMMs  
752 adding an ICV covariate, then scaled the LH and RH fitted lifespan trajectories by the prediction at the minimum age (i.e.  
753 ~4 years). Age at peak thickness asymmetry was estimated where the CI's of absolute hemispheric trajectories were  
754 maximally non-overlapping.

#### 756 **4.3.3 Interregional correlations**

757 We assessed covariance between asymmetries, separately for areal and thickness asymmetry. Here, we regressed out  
758 age, sex and scanner (where applicable) from each AI, using linear mixed models after collating the data from each  
759 sample (adding random intercepts for LCBC subjects), to ensure the correction was unaffected by differences in sample  
760 age-distribution. Separately for each dataset, we then obtained the cluster-cluster correlation matrix. All individual AI's in  
761 clusters with rightward mean asymmetry were inversed, such that positive correlations denote asymmetry-asymmetry  
762 relationships regardless of the direction of mean asymmetry in the cluster (i.e. higher asymmetry in the population-  
763 direction). At this point, two strong outliers in HCP data were detected and discarded for this and all subsequent analyses

764 (Figure 4—figure supplement 4). Replication was assessed using the Mantel test (“ade4”<sup>112</sup>) between each dataset-pair  
765 (LCBC, UKB, HCP) across 10,000 permutations. We then post-hoc tested whether covariance between areal  
766 asymmetries was related to proximity in cortex, obtaining the average geodesic distance between all clusters along the  
767 ipsilateral surface (“SurfDist” Python package<sup>113</sup>), and correlating pair-wise distance with pair-wise correlation coefficient  
768 (Fisher’s transformed coefficients; Spearman’s correlation). To post-hoc assess whether observed covariance patterns  
769 for thickness asymmetry reflected a global effect, we ran a PCA across z-transformed AIs for all thickness clusters (pre-  
770 corrected for the same covariates). Based on the results, we computed the mean AIs across all leftward clusters, and  
771 across all rightward clusters, and tested the partial correlation between mean leftward thickness asymmetry in left-  
772 asymmetric clusters and mean rightward thickness asymmetry in right-asymmetric clusters, in each of the three cohorts.  
773

#### 774 4.3.4 Heritability

775 Heritability of areal and thickness asymmetry was assessed using both twin- and SNP-based methods, both for our set  
776 of robust clusters and cortex-wide across 500 parcels<sup>50</sup>. For cluster analyses, significance was considered at Bonferroni-  
777 corrected  $p < .05$  applied separately across each metric. Cortex-wide significance was considered at  $p(FDR) < .05$  (500  
778 tests per map). Twin heritability was assessed using AE models in “OpenMx”<sup>114</sup>, which use observed cross-twin and  
779 cross-sibling covariance to decompose the proportion of observed phenotypic variance into additive genetic effects [A],  
780 and unique environmental effects or error [E]. Data were reformatted such that rows represented family-wise  
781 observations. As is standard, we set A to be 1 for MZ twins assumed to share 100% of their segregating genes (but see  
782<sup>115</sup>), and 0.5 for DZ twins and siblings that share 50% on average. For each phenotype we first regressed out age and  
783 sex and computed z-scores. Statistical significance was assessed by comparing model fit to submodels with the A  
784 parameter set to 0.  
785

786 For SNP-heritability, the final genetic sample consisted of 31,433 UKB participants (application #32048) with imaging  
787 and quality checked genetic data. We removed subjects that were outliers based on heterozygosity [field 22027] and  
788 missingness ( $> 0.05$ ), mismatched genetic and reported sex [22001], sex chromosome aneuploidies [22019], and those  
789 not in the “white British ancestry” subset [22006]<sup>116</sup>. At variant level, after removing SNPs with minor allele frequency  $<$   
790 0.01, data from 654,584 autosomal SNPs were used to compute a genetic relationship matrix using GCTA (v1.93.2)<sup>117</sup>.  
791 For each phenotype, we first regressed out age and sex and computed z-scores. Genome-based restricted maximum  
792 likelihood (GREML) methods as implemented in GCTA were then used to compute SNP-heritability for each AI measure,  
793 applying a kinship coefficient cut-off of 0.025 (excluding one individual from each pair), and controlling for genetic  
794 population structure (first ten principal components). Bivariate GREML analysis was used to test genetic correlations  
795 between asymmetry clusters<sup>117</sup>. These estimate the proportion of variance two asymmetries share due to genetic  
796 influences through pleiotropic action of genes<sup>118</sup>. We tested genetic relationships only for cluster-pairs where both  
797 clusters exhibited significant SNP-heritability ( $p < .05$ ; pre-corrected; 78 tests for area, 48 for thickness). Significance of  
798 genetic correlations was assessed at  $p(FDR) < .05$ .  
799

#### 801 4.3.5 Associations with Cognition, Sex, Handedness, & ICV

802 Finally, we assessed relationships between asymmetry in our robust clusters and general cognitive ability, handedness,  
803 sex and ICV. For general cognition, we used the first principal component across the following 11 core UK Biobank  
804 cognitive variables<sup>95</sup>: Mean reaction time (log transformed) [field 20023], Numeric memory [4282], Fluid reasoning  
805 [20016], Matrix completion [6373], Tower rearranging [21004], Symbol digit substitution [23324], Paired associate  
806 learning [20197], Prospective memory [20018] (recoded as 1 or 0, depending on whether the instruction was remembered  
807 on the first attempt or not), Pairs matching (log) [399], Trail making A (log) [6348], Trail making B (log) [6350]. Prior to  
808 the PCA, for participants with cognitive data, data was imputed for missing cognitive variables via the “imputePCA” R  
809 function (number of estimated components tentatively optimized using general cross validation; “missMDA” Package<sup>119</sup>).  
810 PC1 (explaining 39.2%; Supplementary file 1L) was inverted to correlate negatively with age ( $r = -.39$ ), ensuring higher  
811 values reflected higher cognition. As fewer participants had cognitive data relative to the other variables, for each cluster  
812 we ran one set of linear models to assess the marginal effect of cognition (PC1 as predictor; age, sex, ICV controlled;  $N$   
813 = 35,199), and one set of linear models to assess the marginal effects of Handedness, Sex, and ICV in a model including  
814 all three predictors (age controlled,  $N = 37,570$  with available handedness data). For the cognitive analysis, effects  
815 identified in the imputed dataset were checked against the confidence intervals for the effect in the subset of the data  
816 with no missing cognitive variables ( $N = 4696$ ). Participants who self-reported as mixed handed were not included<sup>22</sup>.  
817 Significance was considered at Bonferroni-corrected  $\alpha = p < 7.3^{-5}$  (.01/136 [34 clusters  $\times$  4]).  
818

#### 820 Data sharing/availability

821 All summary-level maps are available at neurovault.org/XXXX (upon acceptance). All code underlying the main  
822 analyses is available at <https://github.com/jamesmroe/PopAsym> and on the Open Science Framework (upon  
823 acceptance). All derived source data underlying all figures is also available here and in Supplementary files 2-3. All  
824 datasets used in this work are openly available, with the exception of LCBC, where participants, which include many  
825 children, have not consented to share their data publicly online. Other datasets used in this work are available without  
826 restrictions and are not subject to application approval (DLBS; [https://fcon\\_1000.projects.nitrc.org/indi/retro/dlbs.html](https://fcon_1000.projects.nitrc.org/indi/retro/dlbs.html));  
827 CC BY-NC; SALD; [http://fcon\\_1000.projects.nitrc.org/indi/retro/sald.html](http://fcon_1000.projects.nitrc.org/indi/retro/sald.html); CC BY-NC; IXI; [https://brain-  
828 development.org/ixi-dataset/](https://brain-development.org/ixi-dataset/); CC BY-SA 3.0). Accordingly, we have made the individual-level data for these samples  
829 available and our code can be used to reproduce vertex-wise analyses in these samples. Individual-level data for the  
830 remaining samples (LCBC; Cam-CAN, HCP; UKB) may be available upon reasonable request, given appropriate

831 ethical, data protection, and data-sharing agreements where applicable. Requests must be submitted and approved via  
832 the relevant channel (details are provided in Supplementary File 1).

#### 833 834 **Acknowledgements**

835 Scripts were run on the Colossus processing cluster at the University of Oslo, and on resources provided by UNINETT  
836 Sigma2 (NN9769K). LCBC funding: European Research Council under grants 283634, 725025 (to A.M.F.), and 313440  
837 (to K.B.W.); Norwegian Research Council (to A.M.F. and K.B.W.) under grants 249931 (TOPPFORSK) and 302854  
838 (FRIPRO; to Y.W.), The National Association for Public Health's dementia research program, Norway (to A.M.F). Data  
839 used in the preparation of this work were obtained from the MGH-USC Human Connectome Project  
840 (<https://ida.loni.usc.edu/login.jsp>). Data used in this work was also provided by the Cambridge Centre for Ageing and  
841 Neuroscience (CamCAN). This research has been conducted using the UK Biobank Resource.

#### 842 843 844 **4.4 References**

- 845  
846 1. van Kesteren, E.-J. & Kievit, R. A. Exploratory factor analysis with structured residuals for brain network data. *Netw. Neurosci.* 1–45 (2020). doi:10.1162/netn\_a\_00162
- 847  
848 2. Stark, D. E. *et al.* Regional Variation in Interhemispheric Coordination of Intrinsic Hemodynamic Fluctuations. *J. Neurosci.* **28**, 13754–13764 (2008).
- 849  
850 3. Schmitt, J. E., Giedd, J. N., Raznahan, A. & Neale, M. C. The genetic contributions to maturational coupling in the human cerebrum: A longitudinal pediatric twin imaging study. *Cereb. Cortex* **28**, 3184–3191 (2018).
- 851  
852 4. Chen, C. H. *et al.* Genetic topography of brain morphology. *Proc. Natl. Acad. Sci. U. S. A.* **110**, 17089–17094 (2013).
- 853  
854 5. Eyler, L. T. *et al.* Conceptual and Data-based Investigation of Genetic Influences and Brain Asymmetry: A Twin Study of Multiple Structural Phenotypes. *J. Cogn. Neurosci.* **26**, 1100–1117 (2014).
- 855  
856 6. Raznahan, A. *et al.* Patterns of coordinated anatomical change in human cortical development: A longitudinal neuroimaging study of maturational coupling. *Neuron* **72**, 873–884 (2011).
- 857  
858 7. Kong, X.-Z. *et al.* Mapping cortical brain asymmetry in 17,141 healthy individuals worldwide via the ENIGMA Consortium. *Proc. Natl. Acad. Sci.* **115**, E5154–E5163 (2018).
- 859  
860 8. Chiarello, C., Vazquez, D., Felton, A. & McDowell, A. Structural asymmetry of the human cerebral cortex: Regional and between-subject variability of surface area, cortical thickness, and local gyrification. *Neuropsychologia* **93**, 365–379 (2016).
- 861  
862 9. Meyer, M., Liem, F., Hirsiger, S., Jäncke, L. & Hänggi, J. Cortical surface area and cortical thickness demonstrate differential structural asymmetry in auditory-related areas of the human cortex. *Cereb. Cortex* **24**, 2541–2552 (2014).
- 863  
864 10. Zhou, D., Lebel, C., Evans, A. & Beaulieu, C. Cortical thickness asymmetry from childhood to older adulthood. *Neuroimage* **83**, 66–74 (2013).
- 865  
866 11. Maingault, S., Tzourio-Mazoyer, N., Mazoyer, B. & Crivello, F. Regional correlations between cortical thickness and surface area asymmetries: A surface-based morphometry study of 250 adults. *Neuropsychologia* **93**, 350–364 (2015).
- 867  
868 12. Shaw, P., Lalonde, F. & Al, L. C. *et al.* Development of Cortical Asymmetry in Typically Developing Children and Its Disruption in Attention-Deficit/Hyperactivity Disorder. **66**, 888–896 (2009).
- 869  
870 13. Lou, Y. *et al.* Brain asymmetry differences between Chinese and Caucasian populations : a surface-based morphometric comparison study. (2019).
- 871  
872 14. Hamilton, L. S. *et al.* Asymmetries of cortical thickness: Effects of handedness, sex, and schizophrenia. *Neuroreport* **18**, 1427–1431 (2007).
- 873  
874 15. Zhou, D. *et al.* Preserved cortical asymmetry despite thinner cortex in children and adolescents with prenatal alcohol exposure and associated conditions. *Hum. Brain Mapp.* **39**, 72–88 (2018).
- 875  
876 16. Koelkebeck, K. *et al.* The contribution of cortical thickness and surface area to gray matter asymmetries in the healthy human brain. *Hum. Brain Mapp.* **35**, 6011–6022 (2014).
- 877  
878 17. Plessen, K. J., Hugdahl, K., Bansal, R., Hao, X. & Peterson, B. S. Sex, age, and cognitive correlates of asymmetries in thickness of the cortical mantle across the life span. *J. Neurosci* **34**, 6294–6302 (2014).
- 879  
880 18. Roe, J. M. *et al.* Asymmetric thinning of the cerebral cortex across the adult lifespan is accelerated in Alzheimer's disease. *Nat. Commun.* **12**, 1–11 (2021).
- 881  
882 19. Li, G., Lin, W., Gilmore, J. H. & Shen, D. Spatial patterns, longitudinal development, and hemispheric asymmetries of cortical thickness in infants from birth to 2 years of age. *J. Neurosci.* **35**, 9150–9162 (2015).
- 883  
884 20. Luders, E. *et al.* Hemispheric asymmetries in cortical thickness. *Cereb. Cortex* **16**, 1232–1238 (2006).
- 885  
886 21. Lyttelton, O. C. *et al.* Positional and surface area asymmetry of the human cerebral cortex. *Neuroimage* **46**, 895–903 (2009).
- 887  
888 22. Sha, Z. *et al.* Handedness and its genetic influences are associated with structural asymmetries of the cerebral cortex in 31,864 individuals. *Proc. Natl. Acad. Sci.* **118**, 1–9 (2021).
- 889  
890 23. Kong, X. *et al.* Mapping brain asymmetry in health and disease through the ENIGMA consortium. *Hum. Brain Mapp.* 1–15 (2020).
- 891  
892 24. Postema, M. C. *et al.* Altered structural brain asymmetry in autism spectrum disorder in a study of 54 datasets. *Nat. Commun.* **10**, 1–12 (2019).
- 893  
894 25. Sha, Z. *et al.* Subtly altered topological asymmetry of brain structural covariance networks in autism spectrum disorder across 43 datasets from the ENIGMA consortium. *Mol. Psychiatry* (2022). doi:10.1038/s41380-022-01452-7
- 895  
896 26. Thompson, P. M. *et al.* Tracking Alzheimer's disease. *Ann. N. Y. Acad. Sci.* **1097**, 183–214 (2007).
- 897  
898 27. Sha, Z. *et al.* The genetic architecture of structural left–right asymmetry of the human brain. *Nat. Hum. Behav.* (2021). doi:10.1038/s41562-021-01069-w
- 899  
900 28. Williams, C. M., Peyre, H., Toro, R. & Ramus, F. Comparing brain asymmetries independently of brain size. *Neuroimage* **254**, 119118 (2022).
- 901  
902 29. Bain, J. S., Filo, S. & Mezer, A. A. The robust and independent nature of structural STS asymmetries. *Brain Struct. Funct.* **224**, 3171–3182 (2019).
- 903  
30. Remer, J. *et al.* Quantifying cortical development in typically developing toddlers and young children, 1–6 years of age. *Neuroimage* **153**, 246–261 (2017).

- 904 31. Li, G. *et al.* Mapping longitudinal hemispheric structural asymmetries of the human cerebral cortex from birth to 2 years  
905 of age. *Cereb. Cortex* **24**, 1289–1300 (2014).
- 906 32. Li, G. *et al.* Mapping region-specific longitudinal cortical surface expansion from birth to 2 years of age. *Cereb. Cortex*  
907 **23**, 2724–2733 (2013).
- 908 33. Nie, J., Li, G. & Shen, D. Development of cortical anatomical properties from early childhood to early adulthood.  
909 *Neuroimage* **76**, 216–224 (2013).
- 910 34. Rentería, M. E. Cerebral asymmetry: A quantitative, multifactorial, and plastic brain phenotype. *Twin Res. Hum. Genet.*  
911 **15**, 401–413 (2012).
- 912 35. Francks, C. Exploring human brain lateralization with molecular genetics and genomics. *Ann. N. Y. Acad. Sci.* **1359**, 1–  
913 13 (2015).
- 914 36. Neubauer, S., Gunz, P., Scott, N. A., Hublin, J. J. & Mitteroecker, P. Evolution of brain lateralization: A shared hominid  
915 pattern of endocranial asymmetry is much more variable in humans than in great apes. *Sci. Adv.* **6**, 1–12 (2020).
- 916 37. Annett, M. Handedness and cerebral dominance: The right shift theory. *J. Neuropsychiatry Clin. Neurosci.* **10**, 459–469  
917 (1998).
- 918 38. Annett, M. A model of the inheritance of handedness and cerebral dominance. *Nature* **204**, 59–60 (1964).
- 919 39. McManus, I. C. & Bryden, M. P. Geschwind's Theory of Cerebral Lateralization: Developing a Formal, Causal Model.  
920 *Psychol. Bull.* **110**, 237–253 (1991).
- 921 40. Geschwind, N. & Galaburda, A. M. Cerebral Lateralization: Biological Mechanisms, Associations, and Pathology: III. A  
922 Hypothesis and a Program for Research. *Arch. Neurol.* **42**, 634–654 (1985).
- 923 41. Guadalupe, T. *et al.* Asymmetry within and around the human planum temporale is sexually dimorphic and influenced  
924 by genes involved in steroid hormone receptor activity. *Cortex* **62**, 41–55 (2015).
- 925 42. Chiarello, C., Vazquez, D., Felton, A. & Leonard, C. M. Structural asymmetry of anterior insula: Behavioral correlates  
926 and individual differences. *Brain Lang.* **126**, 109–122 (2013).
- 927 43. Liu, H., Stuffelbeam, S. M., Sepulcre, J., Hedden, T. & Buckner, R. L. Evidence from intrinsic activity that asymmetry of  
928 the human brain is controlled by multiple factors. *Proc. Natl. Acad. Sci. U. S. A.* **106**, 20499–20503 (2009).
- 929 44. Crow, T. J., Crow, L. R., Done, D. J. & Leask, S. Relative hand skill predicts academic ability: Global deficits at the  
930 point of hemispheric indecision. *Neuropsychologia* **36**, 1275–1282 (1998).
- 931 45. Hirnstein, M., Leask, S., Rose, J. & Hausmann, M. Disentangling the relationship between hemispheric asymmetry and  
932 cognitive performance. *Brain Cogn.* **73**, 119–127 (2010).
- 933 46. Moodie, J. E. *et al.* Fluctuating asymmetry in brain structure and general intelligence in 73-year-olds. *Intelligence* **78**,  
934 101407 (2020).
- 935 47. Yeo, R. A., Ryman, S. G., Pommy, J., Thoma, R. J. & Jung, R. E. General cognitive ability and fluctuating asymmetry  
936 of brain surface area. *Intelligence* **56**, 93–98 (2016).
- 937 48. Wiberg, A. *et al.* Handedness, language areas and neuropsychiatric diseases: insights from brain imaging and  
938 genetics. *Brain* 1–10 (2019). doi:10.1093/brain/awz257
- 939 49. Miller, K. L. *et al.* Multimodal population brain imaging in the UK Biobank prospective epidemiological study. *Nat.*  
940 *Neurosci.* **19**, 1523–1536 (2016).
- 941 50. Schaefer, A. *et al.* Local-Global Parcellation of the Human Cerebral Cortex from Intrinsic Functional Connectivity MRI.  
942 *Cereb. Cortex* 1–20 (2017). doi:10.1093/cercor/bhx179
- 943 51. Hugdahl, K. Hemispheric asymmetry: Contributions from brain imaging. *Wiley Interdiscip. Rev. Cogn. Sci.* **2**, 461–478  
944 (2011).
- 945 52. Toga, a W. & Thompson, P. M. Mapping brain asymmetry. *Nat. Rev. Neurosci.* **4**, 37–48 (2003).
- 946 53. Walhovd, K. B. *et al.* Neurodevelopmental origins of lifespan changes in brain and cognition. *Proc. Natl. Acad. Sci. U.*  
947 *S. A.* **113**, 9357–9362 (2016).
- 948 54. Grasby, K. L. *et al.* The genetic architecture of the human cerebral cortex. *Science (80- )*. **367**, (2020).
- 949 55. Rakic, P. A small step for the cell, a giant leap for mankind: a hypothesis of neocortical expansion during evolution.  
950 *Trends Neurosci.* **18**, 383–388 (1995).
- 951 56. Fjell, A. M. *et al.* Continuity and Discontinuity in Human Cortical Development and Change From Embryonic Stages to  
952 Old Age. *Cereb. Cortex* **29**, 3879–3890 (2019).
- 953 57. Wierenga, L. M., Langen, M., Oranje, B. & Durston, S. Unique developmental trajectories of cortical thickness and  
954 surface area. *Neuroimage* **87**, 120–126 (2014).
- 955 58. Chance, S. A., Casanova, M. F., Switala, A. E. & Crow, T. J. Minicolumnar structure in Heschl's gyrus and planum  
956 temporale: Asymmetries in relation to sex and callosal fiber number. *Neuroscience* **143**, 1041–1050 (2006).
- 957 59. Tzourio-Mazoyer, N., Crivello, F. & Mazoyer, B. Is the planum temporale surface area a marker of hemispheric or  
958 regional language lateralization? *Brain Struct. Funct.* **223**, 1217–1228 (2018).
- 959 60. Ocklenburg, S. *et al.* Neurite architecture of the planum temporale predicts neurophysiological processing of auditory  
960 speech. *Sci. Adv.* **4**, 1–9 (2018).
- 961 61. Natu, V. S. *et al.* Apparent thinning of human visual cortex during childhood is associated with myelination. *Proc. Natl.*  
962 *Acad. Sci.* **116**, 20750–20759 (2019).
- 963 62. Petanjek, Z. *et al.* Extraordinary neoteny of synaptic spines in the human prefrontal cortex. *Proc. Natl. Acad. Sci. U. S.*  
964 *A.* **108**, 13281–13286 (2011).
- 965 63. Faust, T. E., Gunner, G. & Schafer, D. P. Mechanisms governing activity-dependent synaptic pruning in the developing  
966 mammalian CNS. *Nat. Rev. Neurosci.* **22**, 657–673 (2021).
- 967 64. Diaz, E., Pinto-Hamuy, T. & Fernández, V. Interhemispheric Structural Asymmetry Induced by a Lateralized Reaching  
968 Task in the Rat Motor Cortex. *Eur. J. Neurosci.* **6**, 1235–1238 (1994).
- 969 65. Fjell, A. M. *et al.* Self-reported sleep relates to hippocampal atrophy across the adult lifespan - results from the  
970 Lifebrain consortium. *Sleep* 1–15 (2019). doi:10.1093/sleep/zsz280
- 971 66. Crow, T. J. A theory of the origin of cerebral asymmetry: Epigenetic variation superimposed on a fixed right-shift.  
972 *Laterality* **15**, 289–303 (2010).
- 973 67. Carrion-Castillo, A. *et al.* Genetic effects on planum temporale asymmetry and their limited relevance to  
974 neurodevelopmental disorders, intelligence or educational attainment. *Cortex* **124**, 137–153 (2020).
- 975 68. Cuellar-Partida, G. *et al.* Genome-wide association study identifies 48 common genetic variants associated with  
976 handedness. *Nat. Hum. Behav.* (2020). doi:10.1038/s41562-020-00956-y
- 977 69. Elliott, L. T. *et al.* Genome-wide association studies of brain imaging phenotypes in UK Biobank. *Nature* **562**, 210–216  
978 (2018).
- 979 70. Dubois, J. *et al.* Structural asymmetries of perisylvian regions in the preterm newborn. *Neuroimage* **52**, 32–42 (2010).

- 980 71. Habas, P. A. *et al.* Early folding patterns and asymmetries of the normal human brain detected from in utero MRI. *Cereb. Cortex* **22**, 13–25 (2012).
- 981 72. Kaspran, G. *et al.* The prenatal origin of hemispheric asymmetry: An in utero neuroimaging study. *Cereb. Cortex* **21**, 1076–1083 (2011).
- 982 73. Hill, J. *et al.* A Surface-Based Analysis of Hemispheric Asymmetries and Folding of Cerebral Cortex in Term-Born Human Infants. *J. Neurosci.* **30**, 2268–2276 (2010).
- 983 74. Bishop, D. V. M. & Bates, T. C. Heritability of language laterality assessed by functional transcranial Doppler ultrasound: A twin study. *Wellcome Open Res.* **4**, 1–52 (2020).
- 984 75. Somers, M. *et al.* Linkage analysis in a Dutch population isolate shows no major gene for left-handedness or atypical language lateralization. *J. Neurosci.* **35**, 8730–8736 (2015).
- 985 76. LeMay, M. Morphological Cerebral Asymmetries of Modern Man, Fossil Man, and Nonhuman Primate. *Ann. N. Y. Acad. Sci.* **280**, 349–366 (1976).
- 986 77. Kong, X.-Z. *et al.* Handedness and Other Variables Associated with Human Brain Asymmetrical Skew. *bioRxiv* 756395 (2019). doi:10.1101/756395
- 987 78. Zhao, L., Matloff, W., Shi, Y., Cabeen, R. P. & Toga, A. W. Mapping Complex Brain Torque Components and Their Genetic and Phenomic Architecture in 24 , 112 healthy individuals. (2021).
- 988 79. Marek, S. *et al.* Reproducible brain-wide association studies require thousands of individuals. *Nature* **603**, 654–660 (2022).
- 989 80. Labache, L. *et al.* A SENTence Supramodal Areas Atlas (SENSAAS) based on multiple task-induced activation mapping and graph analysis of intrinsic connectivity in 144 healthy right-handers. *Brain Struct. Funct.* **224**, 859–882 (2019).
- 990 81. Bidula, S. P. & Króliczak, G. Structural asymmetry of the insula is linked to the lateralization of gesture and language. *Eur. J. Neurosci.* **41**, 1438–1447 (2015).
- 991 82. Keller, S. S. *et al.* Can the language-dominant hemisphere be predicted by brain anatomy? *J. Cogn. Neurosci.* **23**, 2013–2029 (2011).
- 992 83. Mazoyer, B. *et al.* Gaussian mixture modeling of hemispheric lateralization for language in a large sample of healthy individuals balanced for handedness. *PLoS One* **9**, 9–14 (2014).
- 993 84. Knecht, S. *et al.* Handedness and hemispheric language dominance in healthy humans. *Brain* **123**, 2512–2518 (2000).
- 994 85. Affif, A., Bouvier, R., Buenerd, A., Trouillas, J. & Mertens, P. Development of the human fetal insular cortex: Study of the gyration from 13 to 28 gestational weeks. *Brain Struct. Funct.* **212**, 335–346 (2007).
- 995 86. Kalani, M. Y. S., Kalani, M. A., Gwinn, R., Keogh, B. & Tse, V. C. K. Embryological development of the human insula and its implications for the spread and resection of insular gliomas. *Neurosurg. Focus* **27**, 1–4 (2009).
- 996 87. McCarrey, A. C., An, Y., Kitner-Triolo, M. H., Ferrucci, L. & Resnick, S. M. Sex differences in cognitive trajectories in clinically normal older adults. *Psychol. Aging* **31**, 166–175 (2016).
- 997 88. Cardinale, F. *et al.* Validation of FreeSurfer-Estimated Brain Cortical Thickness: Comparison with Histologic Measurements. *Neuroinformatics* **12**, 535–542 (2014).
- 998 89. Hedges, E. P. *et al.* Reliability of structural MRI measurements: The effects of scan session, head tilt, inter-scan interval, acquisition sequence, FreeSurfer version and processing stream. *Neuroimage* **246**, 118751 (2022).
- 999 90. Sørensen, Ø., Wallhovd, K. B. & Fjell, A. M. A Recipe for Accurate Estimation of Lifespan Brain Trajectories, Distinguishing Longitudinal and Cohort Effects. (2020).
- 1000 91. Dalmaijer, E. S. Twin studies with unmet assumptions are biased towards genetic heritability. *bioRxiv* 2020.08.27.270801 (2020).
- 1001 92. Hibar, D. P. *et al.* Novel genetic loci associated with hippocampal volume. *Nat. Commun.* **8**, (2017).
- 1002 93. Cheverud, J. M. A comparison of genetic and phenotypic correlations. *Evolution (N. Y.)* **42**, 958–968 (1988).
- 1003 94. Sodini, S. M., Kemper, K. E., Wray, N. R. & Trzaskowski, M. Comparison of genotypic and phenotypic correlations: Cheverud's conjecture in humans. *Genetics* **209**, 941–948 (2018).
- 1004 95. Fawns-Ritchie, C. & Deary, I. J. Reliability and validity of the UK Biobank cognitive tests. *PLoS One* **15**, 1–24 (2020).
- 1005 96. Ocklenburg, S., Hirnstein, M., Beste, C. & Güntürkün, O. Lateralization and cognitive systems. *Washington, DC APA, Guidel. Dev. Panel Treat. Posttraumatic Stress Disord. Adults.* **5**, (2014).
- 1006 97. Aki Nikolaidis *et al.* Suboptimal phenotypic reliability impedes reproducible human neuroscience. *bioRxiv* (2022). doi:https://doi.org/10.1101/2022.07.22.501193
- 1007 98. Shafto, M. A. *et al.* The Cambridge Centre for Ageing and Neuroscience (Cam-CAN) study protocol: A cross-sectional, lifespan, multidisciplinary examination of healthy cognitive ageing. *BMC Neurol.* **14**, 1–25 (2014).
- 1008 99. Taylor, J. R. *et al.* The Cambridge Centre for Ageing and Neuroscience (Cam-CAN) data repository: Structural and functional MRI, MEG, and cognitive data from a cross-sectional adult lifespan sample. *Neuroimage* **144**, 262–269 (2017).
- 1009 100. Kennedy, K. M. *et al.* Effects of beta-amyloid accumulation on neural function during encoding across the adult lifespan. *Neuroimage* **62**, 1–8 (2012).
- 1010 101. Wei, D. *et al.* Data Descriptor: Structural and functional brain scans from the cross-sectional Southwest University adult lifespan dataset. *Sci. Data* **5**, 1–10 (2018).
- 1011 102. Van Essen, D. C. *et al.* The WU-Minn Human Connectome Project: An overview. *Neuroimage* **80**, 62–79 (2013).
- 1012 103. Vidal-Pineiro, D. *et al.* Cellular correlates of cortical thinning throughout the lifespan. Preprint at <https://www.biorxiv.org/content/10.1101/585786v3>. (2019).
- 1013 104. Fischl, B. & Dale, A. M. Measuring the thickness of the human cerebral cortex from magnetic resonance images. *Proc. Natl. Acad. Sci. U. S. A.* **97**, 11050–5 (2000).
- 1014 105. Zaretskaya, N., Fischl, B., Reuter, M., Renvall, V. & Polimeni, J. R. Advantages of cortical surface reconstruction using submillimeter 7 T MEMPRAGE. *Neuroimage* **165**, 11–26 (2018).
- 1015 106. Marie, D., Maingault, S., Crivello, F., Mazoyer, B. & Tzourio-Mazoyer, N. Surface-Based Morphometry of Cortical Thickness and Surface Area Associated with Heschl's Gyri Duplications in 430 Healthy Volunteers. *Front. Hum. Neurosci.* **10**, (2016).
- 1016 107. Greve, D. *et al.* A Surface-based Analysis of Language Lateralization and Cortical Asymmetry. *J. Cogn. Neurosci.* **25**, 1477–1492 (2013).
- 1017 108. Winkler, A. M. *et al.* Measuring and comparing brain cortical surface area and other areal quantities. *Neuroimage* **61**, 1428–1443 (2012).
- 1018 109. Bernal-Rusiel, J. L., Reuter, M., Greve, D. N., Fischl, B. & Sabuncu, M. R. Spatiotemporal linear mixed effects modeling for the mass-univariate analysis of longitudinal neuroimage data. *Neuroimage* **81**, 358–370 (2013).
- 1019
- 1020
- 1021
- 1022
- 1023
- 1024
- 1025
- 1026
- 1027
- 1028
- 1029
- 1030
- 1031
- 1032
- 1033
- 1034
- 1035
- 1036
- 1037
- 1038
- 1039
- 1040
- 1041
- 1042
- 1043
- 1044
- 1045
- 1046
- 1047
- 1048
- 1049
- 1050
- 1051
- 1052
- 1053
- 1054
- 1055

- 1056  
1057  
1058  
1059  
1060  
1061  
1062  
1063  
1064  
1065  
1066  
1067  
1068  
1069  
1070  
1071  
1072  
1073  
1074
110. Wood, S. & Scheipl, F. gamm4: Generalized Additive Mixed Models using 'mgcv' and 'lme4'. R package version 0.2-5, available at <https://cran.r-project.org/web/packages/gamm4/gamm4.pdf>. (2017).
  111. Sørensen, Ø., Walhovd, K. B. & Fjell, A. M. A recipe for accurate estimation of lifespan brain trajectories, distinguishing longitudinal and cohort effects. *Neuroimage* **226**, (2021).
  112. Dray, S. & Dufour, A. B. The ade4 package: Implementing the duality diagram for ecologists. *J. Stat. Softw.* **22**, 1–20 (2007).
  113. Margulies, D. S., Falkiewicz, M. & Huntenburg, J. M. A cortical surface-based geodesic distance package for Python. *Gigascience* **5**, 1–26 (2016).
  114. Neale, M. C. *et al.* OpenMx 2.0: Extended Structural Equation and Statistical Modeling. *Psychometrika* **81**, 535–549 (2016).
  115. Jonsson, H. *et al.* Differences between germline genomes of monozygotic twins. *Nat. Genet.* **53**, 27–34 (2021).
  116. Bycroft, C. *et al.* The UK Biobank resource with deep phenotyping and genomic data. *Nature* **562**, 203–209 (2018).
  117. Yang, J. *et al.* Common SNPs explain a large proportion of the heritability for human height. *Nat. Genet.* **42**, 565–569 (2010).
  118. van Rheenen, W., Peyrot, W. J., Schork, A. J., Lee, S. H. & Wray, N. R. Genetic correlations of polygenic disease traits: from theory to practice. *Nat. Rev. Genet.* **20**, 567–581 (2019).
  119. Josse, J. & Husson, F. missMDA: A package for handling missing values in multivariate data analysis. *J. Stat. Softw.* **70**, (2016).
